# Supplementary material for: Dependence between luminescence properties of Cu(i) complexes and electronic/structural parameters derived from steric effects
Source: Royal Society of Chemistry journal article supplement (doi:10.1039/d2nj00407k), 2022-01-01
Supplement: d2nj00407k1.pdf [file d2nj00407k1.pdf]

# **Dependence between luminescent properties of Cu(I) complexes and electronic/structural parameters derived from steric effects**

Mireya Santander-Nelli,<sup>1,2,\*</sup> Diego Cortés-Arriagada,<sup>3</sup> Luis Sanhueza,<sup>4,5</sup> Paulina Dreyse<sup>6,\*</sup>

<sup>1</sup>Advanced Integrated Technologies (AINTECH), Chorrillo Uno, Parcela 21, Lampa, Santiago, Chile.

<sup>2</sup>Centro Integrativo de Biología y Química Aplicada (CIBQA), Universidad Bernardo O'Higgins, General Gana 1702, Santiago 8370854, Chile.

<sup>3</sup>Programa Institucional de Fomento a la Investigación, Desarrollo e Innovación. Universidad Tecnológica Metropolitana, Ignacio Valdivieso, 2409, San Joaquín, Santiago 8940577, Chile.

<sup>4</sup>Departamento de Ciencias Biológicas y Químicas, Facultad de Recursos Naturales, Universidad Católica de Temuco, Casilla 15-D, Temuco, Chile.

<sup>5</sup>Núcleo de Investigación en Bioproductos y Materiales Avanzados (BioMA), Universidad Católica de Temuco, Av. Rudecindo Ortega 02950, Temuco, Chile.

<sup>6</sup>Departamento de Química, Universidad Técnica Federico Santa María, Avda. España 1680, Casilla 2390123, Valparaíso, Chile.

\*Corresponding authors: [Mireya Santander-Nelli \(ms@aintech.cl\)](mailto:ms@aintech.cl) and [Paulina Dreyse \(paulina.dreyse@usm.cl\)](mailto:paulina.dreyse@usm.cl)

## Table of contents

|                                                                                                                |           |
|----------------------------------------------------------------------------------------------------------------|-----------|
| <b>S1. Benchmark study with other DFT functionals .....</b>                                                    | <b>3</b>  |
| <b>S2. Energies of the molecular orbitals from HOMO-3 to LUMO+2, in the ground state.....</b>                  | <b>4</b>  |
| <b>S3. Contribution to molecular orbitals from HOMO-3 to LUMO+2, in the ground state .....</b>                 | <b>5</b>  |
| <b>S4. Simulated electronic absorption spectra .....</b>                                                       | <b>6</b>  |
| <b>S5. Molecular orbitals from HOMO-2 to LUMO+1, in the triplet excited state .....</b>                        | <b>9</b>  |
| <b>S6. Geometries of the ground states and the triplet states.....</b>                                         | <b>12</b> |
| <b>S7. Pauli repulsion energy .....</b>                                                                        | <b>14</b> |
| <b>S8. Other complexes .....</b>                                                                               | <b>15</b> |
| <b>S9. Prediction of radiative (<math>k_r</math>) and non-radiative constants (<math>k_{nr}</math>).....</b>   | <b>17</b> |
| <b>S10. XYZ coordinates of the optimized molecular structures (<math>S_0</math> and <math>T_1</math>).....</b> | <b>17</b> |

## S1. Benchmark study with other DFT functionals

A benchmark study was performed to test the reliability of the selected methodology. The absorption spectra and emission energies were determined for complex **B1** ([Cu(bathocuproine)(POP)]<sup>+</sup>) and was compared against the experimental data. The absorption spectra were obtained from the optimized geometry in the ground state using the TD-DFT methodology and the T<sub>1</sub> state was fully optimized through TD-DFT optimization with eight different DFT functionals: B3LYP [1], B3PW91 [2-5], BLYP [6], M06 [7], TPSSH [8], wB97XD [9], M06-2X [7] and PBE0 [10].

The benchmark study was carried out mainly to find the methodology that best reproduced the experimental luminescent properties for the **B1** complex. The emission energy was calculated as the vertical energy difference between the relaxed triplet state and ground state at the optimized triplet geometry. The implicit solvent effects by the IEF-PCM method were also included using dichloromethane as solvent. The basis set and pseudo-potential used are the same for all the methodologies as described in the manuscript.

**Table S1.** Emission wavelengths from the triplet excited states for the complex **B1**.

| Functional          | $\lambda_{emi}$ (nm) |
|---------------------|----------------------|
| B3LYP               | 634                  |
| B3Pw91              | 643                  |
| BLYP                | 916                  |
| M06                 | 692                  |
| TPSSH               | 768                  |
| wB97XD              | 726                  |
| <b>M06-2X</b>       | <b>555</b>           |
| PBE0                | 672                  |
| <i>Experimental</i> | <i>558 [11]</i>      |

According to the results obtained, it is observed that the functional M06-2X presents the smallest deviation (3 nm) with respect to the experimental emission energy of the **B1** complex, then, this functional was selected to describe the emission of the Cu(I) complexes studied. However, it overestimates the values of the MLCT band (270 to 310 nm) of the absorption spectrum, therefore, PBE0 functional was chosen to reproduce the absorption properties due to the MLCT band was determined in a range between 340 and 390 nm which is close to the experimental data (350-450 nm) [11]. The choice of two different functionals that allow describing the ground and the excited state is a strategy that has already been used previously in compounds with transition metals [12, 13].

## **S2. Energies of the molecular orbitals from HOMO-3 to LUMO+2, in the ground state.**

**Table S2.** Energy of frontier molecular orbitals (eV) and H-L gaps of the ground state ( $S_0$ ) obtained at the PBE0/6-31G(d,p)/LANL2DZ level of theory.

| <b>Orbital</b>                 | <b>A1</b>   | <b>A2</b>   | <b>A3</b>   | <b>A4</b>   | <b>B1</b>   | <b>B2</b>   | <b>B3</b>   | <b>B4</b>   | <b>B4-1</b> | <b>B4-2</b> |
|--------------------------------|-------------|-------------|-------------|-------------|-------------|-------------|-------------|-------------|-------------|-------------|
| L+2                            | -1.26       | -1.23       | -1.35       | -1.27       | -1.22       | -1.23       | -1.34       | -1.27       | -1.85       | -1.27       |
| L+1                            | -1.91       | -1.91       | -1.93       | -1.99       | -2.08       | -2.02       | -2.04       | -2.10       | -2.24       | -2.05       |
| L                              | -2.10       | -2.09       | -2.12       | -2.17       | -2.22       | -2.17       | -2.18       | -2.24       | -2.58       | -2.19       |
| H                              | -6.24       | -6.23       | -6.35       | -6.36       | -6.24       | -6.20       | -6.32       | -6.32       | -6.19       | -5.47       |
| H-1                            | -6.88       | -6.90       | -6.75       | -6.78       | -6.86       | -6.85       | -6.74       | -6.77       | -6.52       | -5.52       |
| H-2                            | -6.90       | -6.98       | -6.85       | -6.88       | -6.90       | -6.88       | -6.80       | -6.80       | -6.61       | -6.30       |
| H-3                            | -7.07       | -7.02       | -7.06       | -7.05       | -6.93       | -6.98       | -6.87       | -6.94       | -6.78       | -6.70       |
| <b><math>\Delta</math> H-L</b> | <b>4.14</b> | <b>4.14</b> | <b>4.19</b> | <b>4.19</b> | <b>4.02</b> | <b>4.03</b> | <b>4.08</b> | <b>4.08</b> | <b>3.61</b> | <b>3.28</b> |

### S3. Contribution to molecular orbitals from HOMO-3 to LUMO+2

**Table S3.** Contribution to molecular orbitals (%) of all complexes calculated from HOMO-3 to LUMO+2 in the ground state ( $S_0$ ), obtained at the PBE0/6-31G(d,p)/LANL2DZ level of theory.

| Orbital | A1        |            |            | A2        |            |            | A3        |            |            | A4        |            |            |
|---------|-----------|------------|------------|-----------|------------|------------|-----------|------------|------------|-----------|------------|------------|
|         | <i>Cu</i> | <i>P^P</i> | <i>N^N</i> |
| L+2     | 1         | 99         | 0          | 1         | 98         | 1          | 0         | 99         | 1          | 0         | 99         | 1          |
| L+1     | 0         | 1          | 99         | 0         | 1          | 99         | 0         | 1          | 99         | 0         | 1          | 99         |
| L       | 2         | 1          | 97         | 2         | 1          | 97         | 2         | 2          | 96         | 2         | 1          | 97         |
| H       | 33        | 61         | 6          | 35        | 59         | 6          | 34        | 58         | 8          | 34        | 59         | 7          |
| H-1     | 40        | 51         | 9          | 58        | 16         | 26         | 42        | 47         | 11         | 37        | 53         | 10         |
| H-2     | 61        | 13         | 26         | 45        | 45         | 10         | 61        | 13         | 26         | 57        | 11         | 32         |
| H-3     | 8         | 55         | 37         | 9         | 74         | 17         | 1         | 13         | 86         | 4         | 15         | 81         |

| Orbital | B1        |            |            | B2        |            |            | B3        |            |            | B4        |            |            |
|---------|-----------|------------|------------|-----------|------------|------------|-----------|------------|------------|-----------|------------|------------|
|         | <i>Cu</i> | <i>P^P</i> | <i>N^N</i> |
| L+2     | 1         | 99         | 1          | 1         | 98         | 1          | 0         | 99         | 1          | 0         | 99         | 1          |
| L+1     | 0         | 1          | 99         | 0         | 0          | 100        | 0         | 1          | 99         | 0         | 1          | 99         |
| L       | 2         | 2          | 96         | 2         | 1          | 97         | 2         | 2          | 96         | 2         | 2          | 96         |
| H       | 34        | 54         | 12         | 34        | 57         | 9          | 33        | 52         | 15         | 33        | 54         | 13         |
| H-1     | 31        | 12         | 57         | 34        | 8          | 58         | 44        | 42         | 14         | 38        | 51         | 11         |
| H-2     | 34        | 15         | 51         | 29        | 13         | 58         | 56        | 17         | 27         | 43        | 11         | 46         |
| H-3     | 41        | 50         | 9          | 46        | 44         | 10         | 4         | 14         | 82         | 18        | 11         | 71         |

| Orbital | B4-1      |            |            | B4-2      |            |            |
|---------|-----------|------------|------------|-----------|------------|------------|
|         | <i>Cu</i> | <i>P^P</i> | <i>N^N</i> | <i>Cu</i> | <i>P^P</i> | <i>N^N</i> |
| L+2     | 0         | 2          | 98         | 0         | 99         | 1          |
| L+1     | 2         | 1          | 96         | 0         | 1          | 99         |
| L       | 0         | 1          | 99         | 2         | 2          | 96         |
| H       | 18        | 26         | 56         | 0         | 0          | 100        |
| H-1     | 18        | 36         | 46         | 0         | 0          | 100        |
| H-2     | 0         | 4          | 96         | 33        | 53         | 14         |
| H-3     | 40        | 48         | 12         | 38        | 52         | 10         |

#### S4. Simulated electronic absorption spectra

The results show a good agreement with the experimental absorption spectra of the complexes **A1**, **A2**, **A4** and **B1** [11, 14]. The analysis of the absorptions was focused on MLCT bands, since these allowed electronic transitions are responsible of the optical properties of Cu(I) complexes, therefore, for the emission processes. Table S4 shows the properties of the first allowed singlet transitions between 350-500 nm for all complexes, namely, the calculated absorption energies, oscillator strength, main contributions of the electronic transitions and their assignments.

According to the compositions of the molecular orbitals, **A1** and **A4** have <sup>1</sup>MLCT, <sup>1</sup>LLCT (singlet ligand-to-ligand charge transfer) and <sup>1</sup>ILCT (singlet intraligand charge transfer) mixed characters, where the electron is promoted from both the metal center and POP ligand to phenanthroline-based skeleton, and from  $\pi$  to  $\pi^*$  orbitals of the N<sup>^</sup>N ligand, these absorption bands are located at higher energy than the other complexes (between 320 and 370 nm). For **A2** and **A3** are characterized by a <sup>1</sup>MLCT and <sup>1</sup>LLCT, due to the contributions of the S<sub>1</sub>, S<sub>2</sub> and S<sub>3</sub> excited states. In agreement with the largest  $\Delta_{H-L}$  observed for the series **A**.

In series **B**, different allowed singlet–singlet transitions are observed, such as <sup>1</sup>MLCT and <sup>1</sup>LLCT for the complexes **B1** and **B2**, mainly due to the HOMO→LUMO and HOMO→LUMO+1 transitions associated to electron promotions from metal/P<sup>^</sup>P ligand moieties toward the N<sup>^</sup>N ligand. For the **B4** complex, transitions with mixed character <sup>1</sup>MLCT/<sup>1</sup>LLCT/<sup>1</sup>ILCT were observed, these transitions involve the orbitals from HOMO-1 to LUMO+1. The **B4-2** complex have a mixed contribution of <sup>1</sup>MLCT, <sup>1</sup>ILCT and <sup>1</sup>LLCT

transitions. The presence of electron-withdrawing groups (phenyl substituents) on N<sup>^</sup>N ligand produces a slight redshift of the MLCT band (between 340 to 380 nm) with respect to the series **A**, caused by the energy stabilization of the LUMO orbital. On the other hand, the destabilization of the HOMO orbital due to the presence of an electron-donor amino group in the **B4** complex considerably reduces the H-L energy gap, shifting the MLCT band even more red-shifted.

Finally, the absorptions for **B4-1** are more displaced at lower energy compared to the other complexes due to the presence of double bond chains in the N<sup>^</sup>N ligand, which stabilizes the LUMO energy and significantly reduces the H-L gap. The use of ligands with extended  $\pi$  systems to lower the energy of the  $\pi^*$  level is a strategy commonly used in solar cell design to improve the redshift in the <sup>1</sup>MLCT band [15]. Singlet-singlet transitions with mixed character <sup>1</sup>MLCT, <sup>1</sup>LLCT and <sup>1</sup>ILCT are observed.

**Table S4.** Properties of the computed low-lying singlet-singlet transitions of all complexes: absorption energies ( $E_{\text{abs}}$ , in eV) and absorption wavelengths ( $\lambda_{\text{abs}}$ , in nm); oscillator strength ( $f$ ); monoexcitations with weighting coefficients and percentage of contribution to the excited state wavefunction; and character of the excited state based on monoexcitations. Values are in dichloromethane as solvent. Determined at the PBE0/6-31G(d)/LANL2DZ level of theory.

| <i>system</i> | <i>state</i>   | $E_{\text{abs}}$ ( $\lambda_{\text{abs}}$ ) | $f$   | <i>monoexcitations</i> | <i>Description</i>                                                                                                                              |
|---------------|----------------|---------------------------------------------|-------|------------------------|-------------------------------------------------------------------------------------------------------------------------------------------------|
| <b>A1</b>     | S <sub>1</sub> | 3.33 (372)                                  | 0.071 | H→L (0.97, 95%)        | Cu(d)+ P <sup>^</sup> P( $\pi$ )→N <sup>^</sup> N ( $\pi^*$ ); <sup>1</sup> MLCT/ <sup>1</sup> LLCT                                             |
|               | S <sub>2</sub> | 3.58 (346)                                  | 0.016 | H→L+1 (0.98, 96%)      | Cu(d)+ P <sup>^</sup> P( $\pi$ )→N <sup>^</sup> N ( $\pi^*$ ); <sup>1</sup> MLCT/ <sup>1</sup> LLCT                                             |
|               | S <sub>4</sub> | 3.85 (322)                                  | 0.010 | H-1→L (0.87, 76%)      | Cu(d)+P <sup>^</sup> P( $\pi$ )+N <sup>^</sup> N→N <sup>^</sup> N ( $\pi^*$ ); <sup>1</sup> MLCT/ <sup>1</sup> LLCT/ <sup>1</sup> ILCT          |
| <b>A2</b>     | S <sub>1</sub> | 3.32 (374)                                  | 0.063 | H→L (0.98, 95%)        | Cu(d)+P <sup>^</sup> P( $\pi$ )→N <sup>^</sup> N ( $\pi^*$ ); <sup>1</sup> MLCT/ <sup>1</sup> LLCT                                              |
|               | S <sub>2</sub> | 3.57 (347)                                  | 0.016 | H→L+1 (0.98, 96%)      | Cu(d)+ P <sup>^</sup> P( $\pi$ )→N <sup>^</sup> N ( $\pi^*$ ); <sup>1</sup> MLCT/ <sup>1</sup> LLCT                                             |
| <b>A3</b>     | S <sub>1</sub> | 3.40 (365)                                  | 0.070 | H→L (0.98, 95%)        | Cu(d)+P <sup>^</sup> P( $\pi$ )→N <sup>^</sup> N ( $\pi^*$ ); <sup>1</sup> MLCT/ <sup>1</sup> LLCT                                              |
|               | S <sub>3</sub> | 3.65 (339)                                  | 0.021 | H→L+1 (0.98, 96%)      | Cu(d)+P <sup>^</sup> P( $\pi$ )→N <sup>^</sup> N ( $\pi^*$ ); <sup>1</sup> MLCT/ <sup>1</sup> LLCT                                              |
| <b>A4</b>     | S <sub>1</sub> | 3.35 (370)                                  | 0.061 | H→L (0.97, 95%)        | Cu(d)+P <sup>^</sup> P( $\pi$ )→N <sup>^</sup> N ( $\pi^*$ ); <sup>1</sup> MLCT/ <sup>1</sup> LLCT                                              |
|               | S <sub>3</sub> | 3.60 (344)                                  | 0.021 | H→L+1 (0.97, 95%)      | Cu(d)+P <sup>^</sup> P( $\pi$ )→N <sup>^</sup> N ( $\pi^*$ ); <sup>1</sup> MLCT/ <sup>1</sup> LLCT                                              |
|               | S <sub>4</sub> | 3.68 (337)                                  | 0.016 | H-1→L (0.88, 77%)      | Cu(d)+P <sup>^</sup> P( $\pi$ )+N <sup>^</sup> N( $\pi$ )→N <sup>^</sup> N ( $\pi^*$ ); <sup>1</sup> MLCT/ <sup>1</sup> LLCT/ <sup>1</sup> ILCT |

|             |                |            |       |                                        |                                                                                                                                                       |
|-------------|----------------|------------|-------|----------------------------------------|-------------------------------------------------------------------------------------------------------------------------------------------------------|
| <b>B1</b>   | S <sub>1</sub> | 3.21 (386) | 0.134 | H→L (0.97, 93%)                        | Cu(d)+P <sup>Λ</sup> P(π)→N <sup>Λ</sup> N (π*); <sup>1</sup> MLCT/ <sup>1</sup> LLCT                                                                 |
|             | S <sub>2</sub> | 3.43 (361) | 0.071 | H→L+1 (0.98, 96%)                      | Cu(d)+P <sup>Λ</sup> P(π)→N <sup>Λ</sup> N (π*); <sup>1</sup> MLCT/ <sup>1</sup> LLC                                                                  |
| <b>B2</b>   | S <sub>1</sub> | 3.24 (383) | 0.113 | H→L (0.98, 96%)                        | Cu(d)+P <sup>Λ</sup> P(π)→N <sup>Λ</sup> N (π*); <sup>1</sup> MLCT/ <sup>1</sup> LLCT                                                                 |
|             | S <sub>2</sub> | 3.46 (358) | 0.054 | H→L+1 (0.98, 97%)                      | Cu(d)+P <sup>Λ</sup> P(π)→N <sup>Λ</sup> N (π*); <sup>1</sup> MLCT/ <sup>1</sup> LLCT                                                                 |
| <b>B3</b>   | S <sub>1</sub> | 3.32 (373) | 0.132 | H→L (0.97, 95%)                        | Cu(d)+P <sup>Λ</sup> P(π)→N <sup>Λ</sup> N (π*); <sup>1</sup> MLCT/ <sup>1</sup> LLCT                                                                 |
|             | S <sub>3</sub> | 3.54 (350) | 0.082 | H→L+1 (0.97, 95%)                      | Cu(d)+P <sup>Λ</sup> P(π)→N <sup>Λ</sup> N (π*); <sup>1</sup> MLCT/ <sup>1</sup> LLCT                                                                 |
|             | S <sub>4</sub> | 3.66 (339) | 0.015 | H-1→L (0.73, 54%)<br>H-2→L (0.58, 33%) | Cu(d)+N <sup>Λ</sup> N(π)→N <sup>Λ</sup> N<br>(π*); <sup>1</sup> MLCT/ <sup>1</sup> LLCT/ <sup>1</sup> ILCT                                           |
| <b>B4</b>   | S <sub>1</sub> | 3.28 (378) | 0.121 | H→L (0.98, 96%)                        | Cu(d)+P <sup>Λ</sup> P(π)→N <sup>Λ</sup> N (π*); <sup>1</sup> MLCT/ <sup>1</sup> LLCT                                                                 |
|             | S <sub>3</sub> | 3.49 (355) | 0.074 | H→L+1 (0.98, 96%)                      | Cu(d)+ P <sup>Λ</sup> P(π)→N <sup>Λ</sup> N (π*); <sup>1</sup> MLCT/ <sup>1</sup> LLCT                                                                |
|             | S <sub>4</sub> | 3.63 (342) | 0.027 | H-1→L (0.86, 73%)                      | Cu(d)+ P <sup>Λ</sup> P(π)+N <sup>Λ</sup> N(π)→N <sup>Λ</sup> N<br>(π*); <sup>1</sup> MLCT/ <sup>1</sup> LLCT/ <sup>1</sup> ILCT                      |
| <b>B4-1</b> | S <sub>1</sub> | 2.93 (422) | 0.375 | H→L (0.97, 95%)                        | Cu(d)+P <sup>Λ</sup> P(π)+N <sup>Λ</sup> N(π)→N <sup>Λ</sup> N<br>(π*); <sup>1</sup> MLCT/ <sup>1</sup> LLCT/ <sup>1</sup> ILCT                       |
|             | S <sub>3</sub> | 3.23 (384) | 0.437 | H-1→L (0.94, 88%)                      | Cu(d) +P <sup>Λ</sup> P(π)+N <sup>Λ</sup> N(π)→N <sup>Λ</sup> N<br>(π*); <sup>1</sup> MLCT/ <sup>1</sup> LLCT/ <sup>1</sup> ILCT                      |
|             | S <sub>6</sub> | 3.44 (360) | 0.304 | H-2→L (0.74, 54%)<br>H-1→L+1(0.42,17%) | N <sup>Λ</sup> N(π)→N <sup>Λ</sup> N (π*); <sup>1</sup> ILCT<br>Cu(d)+N <sup>Λ</sup> N(π)→N <sup>Λ</sup> N (π*); <sup>1</sup> MLCT/ <sup>1</sup> ILCT |
| <b>B4-2</b> | S <sub>4</sub> | 3.07 (403) | 0.257 | H-1→L+1(0.97,95%)                      | N <sup>Λ</sup> N (π)→N <sup>Λ</sup> N (π*); <sup>1</sup> ILCT                                                                                         |
|             | S <sub>5</sub> | 3.31 (374) | 0.085 | H-2→L (0.98, 96%)                      | Cu(d)+ P <sup>Λ</sup> P(π)→N <sup>Λ</sup> N (π*); <sup>1</sup> MLCT/ <sup>1</sup> LLCT                                                                |
|             | S <sub>7</sub> | 3.51 (353) | 0.072 | H-2→L+2(0.98,96%)                      | Cu(d)+ P <sup>Λ</sup> P(π)→N <sup>Λ</sup> N (π*); <sup>1</sup> MLCT/ <sup>1</sup> LLCT                                                                |



## S5. Molecular orbitals from HOMO-2 to LUMO+1, in the triplet excited state

**Table S5.** Contribution to molecular orbitals (%) involved in deactivating the triplet excited state ( $T_1$ ) (from HOMO-2 to LUMO+1) of all complexes under study, obtained at the M06-2X/6-31G(d,p)/LANL2DZ level of theory. Contribution to the molecular orbitals (%) involved in the deactivation of the excited triplet state ( $T_1$ ) (from HOMO-2 to LUMO + 2) of all the complexes under study, obtained in the M06-2X / 6-31G (d, p) / Theoretical level LANL2DZ.

| Orbital | A1 |                  |                  | A2 |                  |                  | A3 |                  |                  | A4 |                  |                  |
|---------|----|------------------|------------------|----|------------------|------------------|----|------------------|------------------|----|------------------|------------------|
|         | Cu | P <sup>^</sup> P | N <sup>^</sup> N | Cu | P <sup>^</sup> P | N <sup>^</sup> N | Cu | P <sup>^</sup> P | N <sup>^</sup> N | Cu | P <sup>^</sup> P | N <sup>^</sup> N |
| L       | 0  | 1                | 99               | 0  | 1                | 99               | 0  | 1                | 99               | 0  | 1                | 99               |
| H       | 10 | 40               | 50               | 12 | 46               | 42               | 7  | 25               | 68               | 8  | 32               | 60               |
| H-1     | 7  | 43               | 50               | 6  | 36               | 58               | 11 | 57               | 32               | 10 | 50               | 40               |

| Orbital | B1 |                  |                  | B2 |                  |                  | B3 |                  |                  | B4 |                  |                  |
|---------|----|------------------|------------------|----|------------------|------------------|----|------------------|------------------|----|------------------|------------------|
|         | Cu | P <sup>^</sup> P | N <sup>^</sup> N | Cu | P <sup>^</sup> P | N <sup>^</sup> N | Cu | P <sup>^</sup> P | N <sup>^</sup> N | Cu | P <sup>^</sup> P | N <sup>^</sup> N |
| L       | 0  | 1                | 99               | 0  | 0                | 100              | 0  | 0                | 100              | 0  | 0                | 100              |
| H       | 4  | 12               | 84               | 6  | 18               | 76               | 3  | 10               | 87               | 4  | 12               | 84               |

| Orbital | B4-1 |                  |                  | B4-2 |                  |                  |
|---------|------|------------------|------------------|------|------------------|------------------|
|         | Cu   | P <sup>^</sup> P | N <sup>^</sup> N | Cu   | P <sup>^</sup> P | N <sup>^</sup> N |
| L+1     | 2    | 1                | 97               | 2    | 2                | 96               |
| L       | 0    | 1                | 99               | 0    | 0                | 100              |
| H       | 2    | 7                | 91               | 0    | 0                | 100              |
| H-1     | 0    | 4                | 96               | 0    | 1                | 99               |
| H-2     | 15   | 71               | 14               | 4    | 13               | 83               |

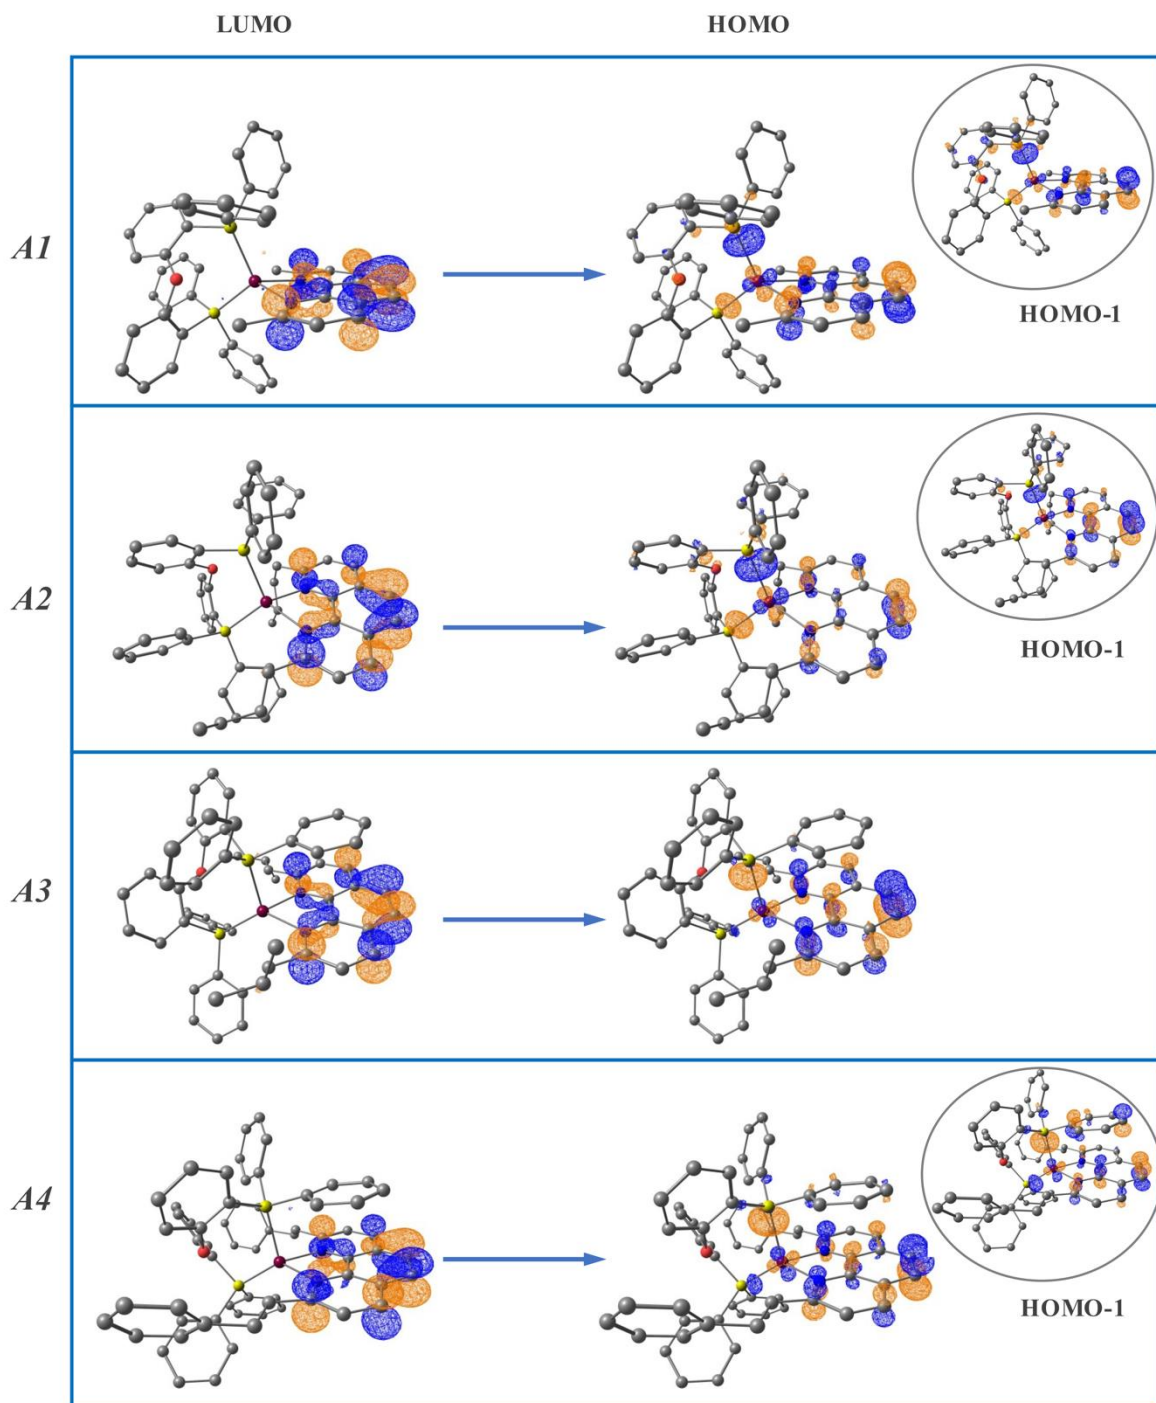

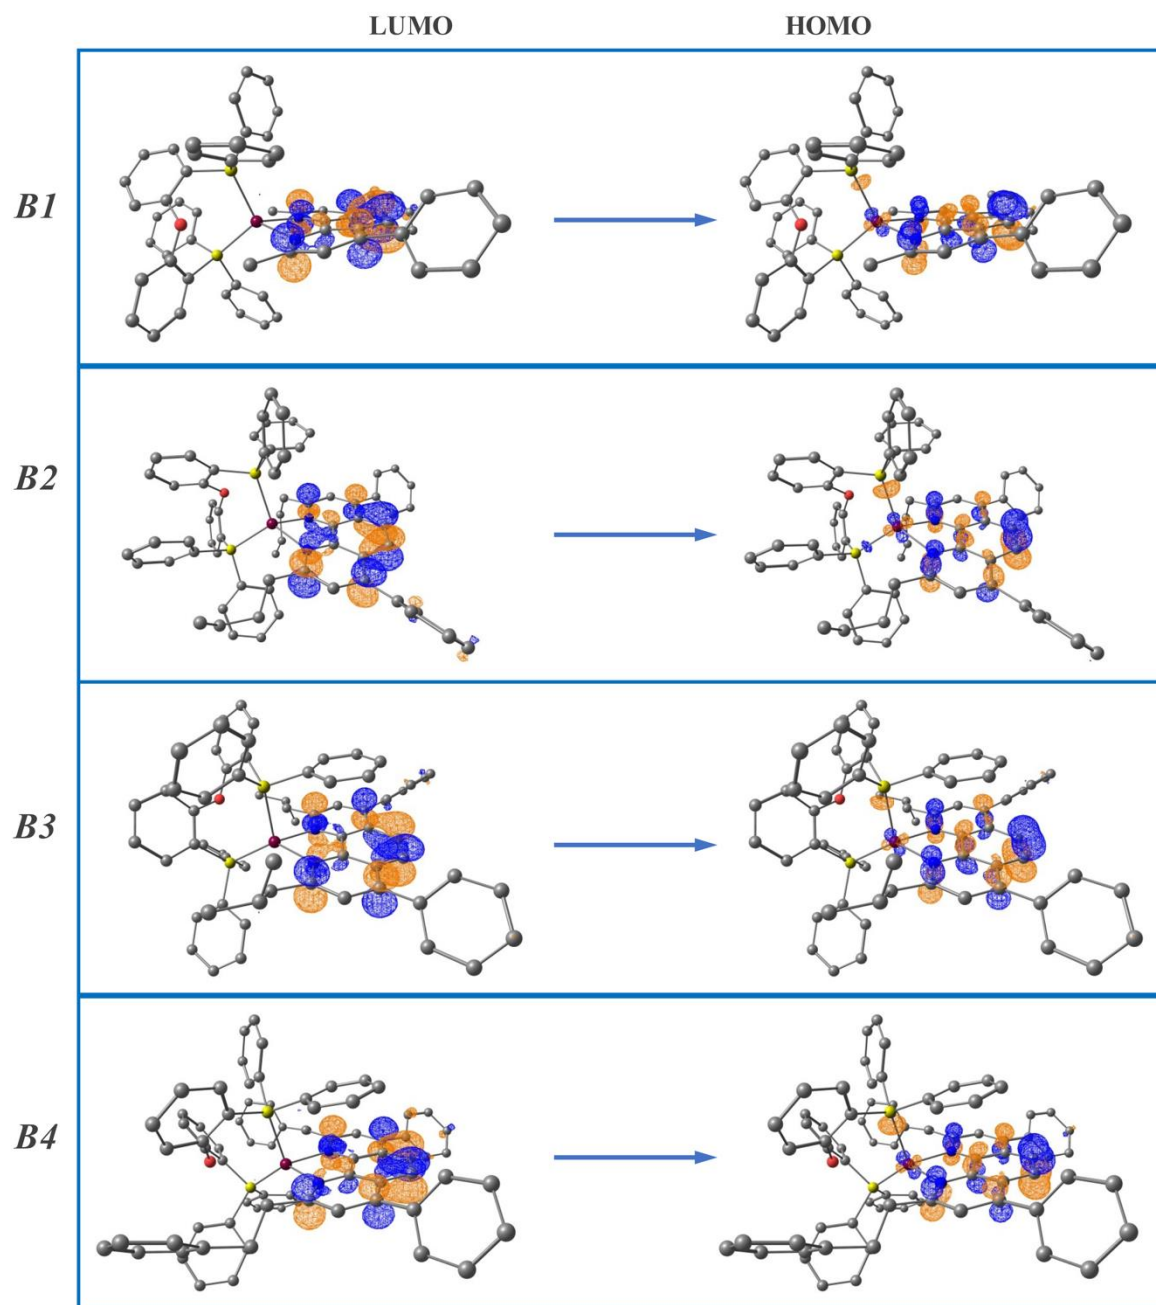

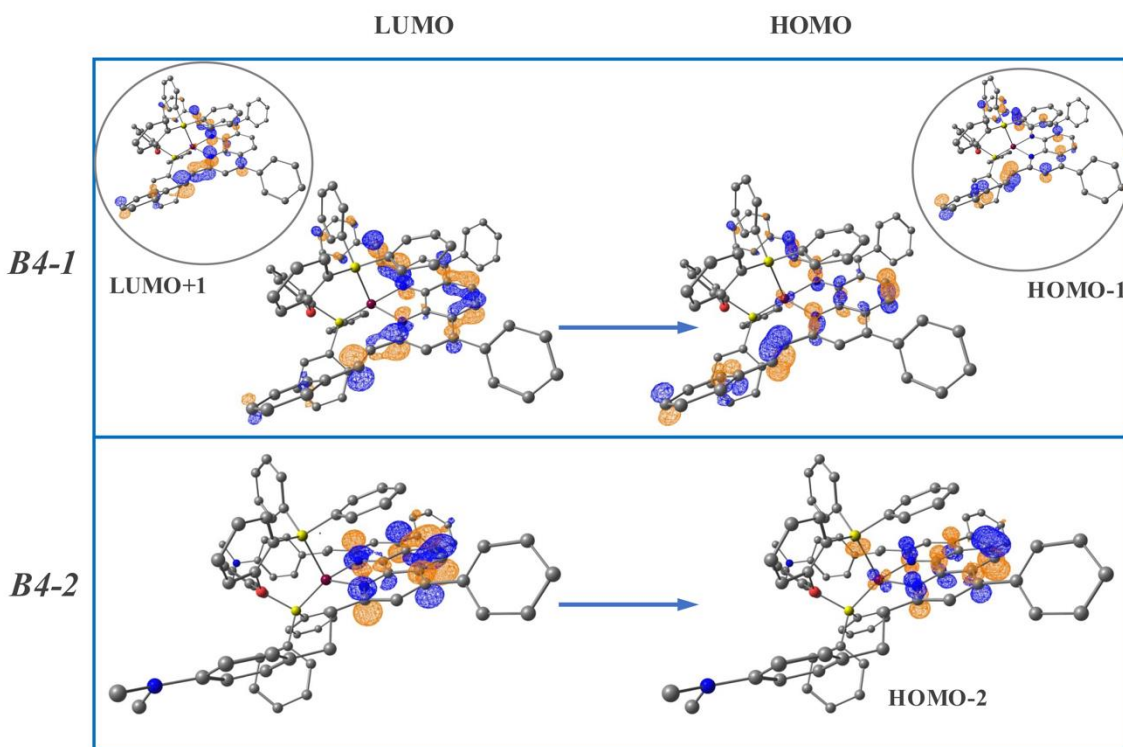

**Figure S1.** Frontier molecular orbitals involved in the radiative deactivation of the lowest-lying triplet excited state of all complexes.

## S6. Geometries of the ground states and the triplet states

**Table S6.** Geometrical parameters of the ground states ( $S_0$ ) and lowest triplet states ( $T_1$  or  $T_2$ ) for all complexes determined at the level PBE0/6-31G(d,p)/LANL2DZ and M06-2X/6-31G(d,p)/LANL2DZ, respectively. Using dichloromethane as solvent.

| Parameter                  | A1     |        | A2     |        | A3     |        | A4     |        |
|----------------------------|--------|--------|--------|--------|--------|--------|--------|--------|
|                            | $S_0$  | $T_1$  | $S_0$  | $T_1$  | $S_0$  | $T_1$  | $S_0$  | $T_1$  |
| <i>Bond length</i><br>(Å)  |        |        |        |        |        |        |        |        |
| Cu-P1                      | 2.366  | 2.420  | 2.362  | 2.426  | 2.405  | 2.499  | 2.342  | 2.358  |
| Cu-P2                      | 2.368  | 2.434  | 2.387  | 2.433  | 2.341  | 2.389  | 2.386  | 2.480  |
| Cu-N1                      | 2.158  | 2.199  | 2.172  | 2.196  | 2.142  | 2.168  | 2.150  | 2.146  |
| Cu-N2                      | 2.173  | 2.174  | 2.191  | 2.197  | 2.163  | 2.191  | 2.158  | 2.178  |
| <i>Bond angle</i><br>(deg) |        |        |        |        |        |        |        |        |
| P1-Cu-P2                   | 114.19 | 110.17 | 111.51 | 108.40 | 117.44 | 113.02 | 117.28 | 114.03 |

|                                |              |              |              |              |              |              |              |              |
|--------------------------------|--------------|--------------|--------------|--------------|--------------|--------------|--------------|--------------|
| P1-Cu-N1                       | 116.11       | 121.46       | 123.17       | 125.76       | 102.87       | 98.63        | 117.67       | 131.13       |
| P1-Cu-N2                       | 112.30       | 118.88       | 117.45       | 115.23       | 105.97       | 98.89        | 121.16       | 125.86       |
| P2-Cu-N1                       | 109.97       | 106.88       | 105.39       | 105.14       | 121.79       | 128.26       | 107.97       | 100.47       |
| P2-Cu-N2                       | 121.14       | 118.81       | 117.75       | 123.47       | 122.34       | 132.09       | 107.07       | 99.57        |
| N1-Cu-N2                       | 78.36        | 76.91        | 77.70        | 76.75        | 79.37        | 77.27        | 79.21        | 77.48        |
| <i>Dihedral angle</i><br>(deg) |              |              |              |              |              |              |              |              |
| P1-P2-N2-N1                    | -80.39       | -82.42       | 83.17        | 87.96        | -72.41       | -74.13       | -74.96       | -79.86       |
| $\tau_4$                       | <b>0.870</b> | <b>0.849</b> | <b>0.844</b> | <b>0.786</b> | <b>0.822</b> | <b>0.707</b> | <b>0.859</b> | <b>0.730</b> |

| Parameter                      | B1             |                | B2             |                | B3             |                | B4             |                |
|--------------------------------|----------------|----------------|----------------|----------------|----------------|----------------|----------------|----------------|
|                                | S <sub>0</sub> | T <sub>1</sub> |
| <i>Bond length</i><br>(Å)      |                |                |                |                |                |                |                |                |
| Cu-P1                          | 2.358          | 2.419          | 2.360          | 2.429          | 2.411          | 2.499          | 2.343          | 2.355          |
| Cu-P2                          | 2.381          | 2.433          | 2.392          | 2.434          | 2.339          | 2.389          | 2.388          | 2.468          |
| Cu-N1                          | 2.149          | 2.200          | 2.163          | 2.190          | 2.134          | 2.162          | 2.143          | 2.158          |
| Cu-N2                          | 2.171          | 2.169          | 2.182          | 2.190          | 2.153          | 2.187          | 2.147          | 2.148          |
| <i>Bond angle</i><br>(deg)     |                |                |                |                |                |                |                |                |
| P1-Cu-P2                       | 112.40         | 110.22         | 111.39         | 107.91         | 117.33         | 113.14         | 117.24         | 115.69         |
| P1-Cu-N1                       | 120.24         | 121.88         | 123.62         | 125.54         | 102.05         | 98.16          | 118.56         | 131.26         |
| P1-Cu-N2                       | 115.41         | 119.15         | 118.83         | 115.83         | 105.36         | 98.23          | 120.91         | 124.97         |
| P2-Cu-N1                       | 107.15         | 106.16         | 105.07         | 105.85         | 123.11         | 128.67         | 107.39         | 98.12          |
| P2-Cu-N2                       | 119.88         | 119.04         | 116.69         | 123.42         | 122.88         | 132.81         | 107.58         | 100.51         |
| N1-Cu-N2                       | 77.56          | 76.43          | 77.07          | 76.26          | 78.75          | 76.72          | 78.63          | 77.49          |
| <i>Dihedral angle</i><br>(deg) |                |                |                |                |                |                |                |                |
| P1-P2-N2-N1                    | -82.22         | -82.96         | 82.84          | 87.62          | -72.18         | -74.24         | -75.85         | -81.31         |
| $\tau_4$                       | <b>0.850</b>   | <b>0.844</b>   | <b>0.834</b>   | <b>0.788</b>   | <b>0.808</b>   | <b>0.699</b>   | <b>0.854</b>   | <b>0.736</b>   |

| Parameter                      | B4-1           |                | B4-2           |                |
|--------------------------------|----------------|----------------|----------------|----------------|
|                                | S <sub>0</sub> | T <sub>1</sub> | S <sub>0</sub> | T <sub>1</sub> |
| <i>Bond length</i><br>(Å)      |                |                |                |                |
| Cu-P1                          | 2.335          | 2.366          | 2.325          | 2.357          |
| Cu-P2                          | 2.405          | 2.489          | 2.399          | 2.468          |
| Cu-N1                          | 2.138          | 2.147          | 2.133          | 2.157          |
| Cu-N2                          | 2.148          | 2.159          | 2.138          | 2.154          |
| <i>Bond angle</i><br>(deg)     |                |                |                |                |
| P1-Cu-P2                       | 118.70         | 113.09         | 117.55         | 115.45         |
| P1-Cu-N1                       | 122.41         | 129.99         | 122.81         | 130.85         |
| P1-Cu-N2                       | 123.64         | 131.61         | 120.50         | 125.30         |
| P2-Cu-N1                       | 101.04         | 97.62          | 103.40         | 98.41          |
| P2-Cu-N2                       | 104.19         | 97.87          | 106.74         | 100.84         |
| N1-Cu-N2                       | 78.70          | 77.55          | 78.86          | 77.37          |
| <i>Dihedral angle</i><br>(deg) |                |                |                |                |
| P1-P2-N2-N1                    | -77.17         | -78.36         | -78.55         | -81.02         |
| $\tau_4$                       | <b>0.801</b>   | <b>0.698</b>   | <b>0.828</b>   | <b>0.736</b>   |

The  $\tau_4$  geometry index is defined as:  $\tau_4 = \{360^\circ - (\theta + \varphi)\} / 141^\circ$ , where  $\theta$  and  $\varphi$  correspond to the two largest angles that pass through the metal center in the four-coordinate geometry [16-18]. The values of  $\tau_4$  can range from 1 (for a perfect tetrahedral geometry) to zero (for a perfect square planar geometry), and  $\tau_4=0.85$  correspond to a trigonal pyramidal geometry.

### S7. Pauli repulsion energy

$\Delta E_{PAULI}$  values were obtained by the second-generation energy decomposition analysis based on absolutely localized molecular orbitals (ALMO-EDA) of the Q-Chem5.2 program [19], which is expressed as:

$$\Delta E_{PAULI} = \sum (E[\tilde{P}_F] - E[P_F]) + (E_{xc}^{DF}[P_{FRZ}] - \sum E_{xc}^{DF}[\tilde{P}_F])$$

where the energies are obtained from a set of fragment-localized orthogonal orbitals  $\mathbf{P}$  (the tildes indicate that these fragment density matrices, and the corresponding densities are modified from the isolated fragment quantities,  $P_F$ ). In this framework,  $E[P_F]$  stands for the energy obtained from fragment molecular contributions, while  $E[P_{FRZ}]$  is the energy obtained for the sum of fragment contributions, where the FRZ term stand for the frozen component (the interaction energy of the complex with constraints on the orbitals to prevent polarization and charge transfer.  $E_{xc}^{DF}$  energies are obtained with the use of a dispersion-free exchange-correlation method (xc), where the Hartree-Fock energy is recommended for hybrid functionals (this is to prevent Pauli energy of dispersion contributions). For a detailed description of these quantities, see reference 20 [20].

## S8. Other Complexes:

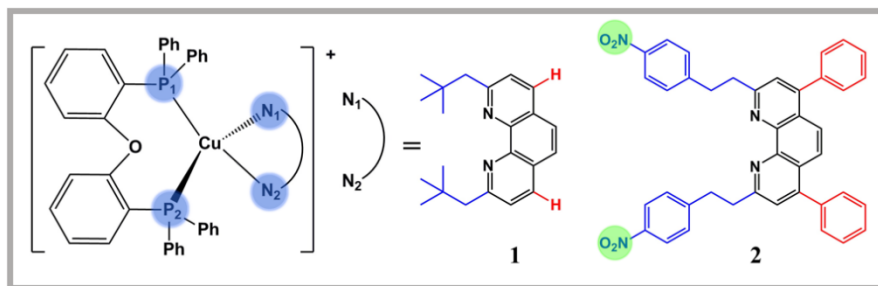

**Figure S2.** Cu(I) complexes according to diimine ( $N^N$ ) ligand: (1) neopentyl and (2) nitro group.

The frontier molecular orbitals of complexes **1** and **2** shown in Fig. S2 follow the same trend as the complexes in the manuscript, namely, the HOMO is distributed between the central metal (32 % to 34 %) and POP ligand (54 % to 58 %) and the LUMO is mainly localized entirely on the  $N^N$  ligand (up to 98%), see Fig. S3 and Table S7. Note that the presence of an electron-withdrawing group (complex **2**) in the  $N^N$  ligand does not show significant change in the contribution of the metal in the HOMO.

Complex **1** has similar characteristics to **A3**, which suggests that the addition of an extra methyl group in the substituent at position 2,9 of phen would not produce significant changes in the molecular properties of the complexes. On the other hand, complex **2** experiences a reduction of  $\Delta_{HL}$  with respect to **B4**, because of the presence of the electron withdrawing group in the ligand  $N^N$  that mainly affects the LUMO, stabilizing its energy, following the trend observed in **B4-1** and **B4-2**.

**Table S7.** Contribution to molecular orbitals (%) HOMO and LUMO in the ground state ( $S_0$ ), obtained at the PBE0/6-31G(d,p)/LANL2DZ level of theory.

| Orbital | 1  |     |     | 2  |     |     |
|---------|----|-----|-----|----|-----|-----|
|         | Cu | P^P | N^N | Cu | P^P | N^N |
| L       | 2  | 2   | 96  | 0  | 0   | 100 |
| H       | 34 | 58  | 8   | 32 | 54  | 14  |

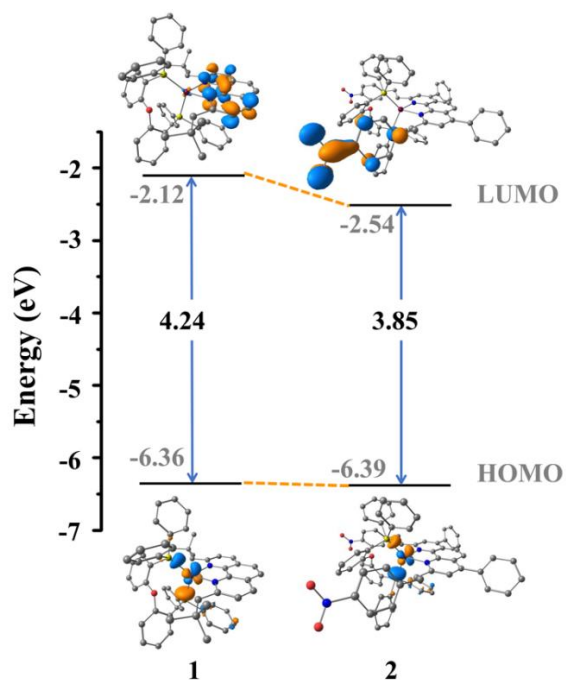

**Figure S3.** Molecular orbital diagrams of complexes **1** and **2**.

The obtained results suggest that the emission properties will not experience significant changes with respect to the series of complexes presented in the main manuscript. However, the presence of an electron-withdrawing group (complex **2**) is reported to induce an important red shift,[21] according to the energy gap law, could lead to a decrease in photoluminescence quantum yield.



## S9. Prediction of radiative ( $k_r$ ) and non-radiative constants ( $k_{nr}$ )

**Table S8.**  $k_{nr}$ ,  $k_r$  and  $\Phi$  experimental and predicted obtained through relationships.

| Complexes   | $k_{nr}(x10^4)$<br><i>predicted</i> | $k_r(x10^4)$<br><i>predicted</i> | $\Phi$ <i>predicted</i> |
|-------------|-------------------------------------|----------------------------------|-------------------------|
| <b>A1</b>   | 6.53                                | 1.08                             | 0.14                    |
| <b>A2</b>   | 4.01                                | 1.48                             | 0.27                    |
| <b>A3</b>   | 3.92                                | 2.52                             | 0.39                    |
| <b>A4</b>   | 19.57                               | 1.98                             | 0.09                    |
| <b>B1</b>   | 4.14                                | 1.58                             | 0.28                    |
| <b>B2</b>   | 7.45                                | 1.33                             | 0.15                    |
| <b>B3</b>   | 6.70                                | 2.55                             | 0.28                    |
| <b>B4</b>   | 36.69                               | 2.04                             | 0.05                    |
| <b>B4-1</b> | 8.40                                | 2.88                             | 0.26                    |
| <b>B4-2</b> | 10.42                               | 3.12                             | 0.23                    |

## S10. XYZ coordinates of the optimized molecular structures (S<sub>0</sub> and T<sub>1</sub>)

| XYZ Coordinates of the S <sub>0</sub> states. |              |              |              | 6 | -0.753214000 | 0.229983000  | 3.253410000  |
|-----------------------------------------------|--------------|--------------|--------------|---|--------------|--------------|--------------|
|                                               |              |              |              | 6 | -0.345846000 | 1.435263000  | -3.403372000 |
| <b>A1</b>                                     |              |              |              | 6 | 2.614729000  | 0.787681000  | 1.596081000  |
|                                               |              |              |              | 6 | 2.480345000  | -0.499076000 | 2.136156000  |
| 29                                            | -0.454922000 | 0.338109000  | -0.139773000 | 6 | 3.103188000  | -0.861767000 | 3.324590000  |
| 15                                            | 1.751422000  | 1.177008000  | 0.018960000  | 6 | 3.898240000  | 0.066901000  | 3.990309000  |
| 15                                            | -0.591768000 | -2.024533000 | -0.210592000 | 6 | 4.051842000  | 1.350265000  | 3.472064000  |
| 8                                             | 1.614102000  | -1.389967000 | 1.532631000  | 6 | 3.412118000  | 1.706451000  | 2.287918000  |
| 7                                             | -1.872037000 | 1.115939000  | 1.290421000  | 6 | 1.716993000  | 3.008012000  | -0.017820000 |
| 7                                             | -1.718313000 | 1.575072000  | -1.402835000 | 6 | 2.233955000  | 3.753718000  | -1.081905000 |
| 6                                             | -1.911672000 | 0.913414000  | 2.604728000  | 6 | 2.073982000  | 5.138510000  | -1.113850000 |
| 6                                             | -3.002699000 | 1.352952000  | 3.386369000  | 6 | 1.400686000  | 5.792346000  | -0.086591000 |
| 6                                             | -4.049292000 | 2.009808000  | 2.790483000  | 6 | 0.874955000  | 5.054970000  | 0.974127000  |
| 6                                             | -4.018105000 | 2.248090000  | 1.401441000  | 6 | 1.021536000  | 3.672613000  | 1.003472000  |
| 6                                             | -5.063889000 | 2.943977000  | 0.721336000  | 6 | 3.024930000  | 0.697890000  | -1.213615000 |
| 6                                             | -4.981818000 | 3.183313000  | -0.614013000 | 6 | 2.713848000  | -0.253882000 | -2.188386000 |
| 6                                             | -3.849976000 | 2.739856000  | -1.364215000 | 6 | 3.672723000  | -0.656291000 | -3.116256000 |
| 6                                             | -3.711035000 | 3.000392000  | -2.743042000 | 6 | 4.951935000  | -0.110735000 | -3.074927000 |
| 6                                             | -2.584619000 | 2.575561000  | -3.399196000 | 6 | 5.276329000  | 0.830866000  | -2.097935000 |
| 6                                             | -1.590311000 | 1.861401000  | -2.694538000 | 6 | 4.321570000  | 1.229377000  | -1.169084000 |
| 6                                             | -2.809868000 | 2.022012000  | -0.731194000 | 6 | 1.072938000  | -2.788306000 | -0.270064000 |
| 6                                             | -2.892430000 | 1.775870000  | 0.687899000  | 6 | 2.058229000  | -2.293987000 | 0.600551000  |

|           |              |              |              |   |              |              |              |
|-----------|--------------|--------------|--------------|---|--------------|--------------|--------------|
| 6         | 3.377596000  | -2.726283000 | 0.528332000  | 8 | -0.403884000 | -2.263568000 | 1.460456000  |
| 6         | 3.726114000  | -3.678190000 | -0.425963000 | 7 | 1.801385000  | 1.433296000  | 1.077837000  |
| 6         | 2.767522000  | -4.194825000 | -1.292835000 | 7 | 0.789255000  | 2.172785000  | -1.355124000 |
| 6         | 1.450753000  | -3.749033000 | -1.212645000 | 6 | 2.261935000  | 1.078314000  | 2.274334000  |
| 6         | -1.392759000 | -2.758006000 | 1.266420000  | 6 | 3.431198000  | 1.658979000  | 2.815800000  |
| 6         | -0.778601000 | -3.723234000 | 2.069132000  | 6 | 4.110477000  | 2.615847000  | 2.107110000  |
| 6         | -1.441714000 | -4.232353000 | 3.184501000  | 6 | 3.627537000  | 3.018551000  | 0.844729000  |
| 6         | -2.722357000 | -3.787973000 | 3.502434000  | 6 | 4.274471000  | 4.025109000  | 0.065319000  |
| 6         | -3.342871000 | -2.829311000 | 2.701998000  | 6 | 3.763107000  | 4.404577000  | -1.135505000 |
| 6         | -2.680078000 | -2.311828000 | 1.594081000  | 6 | 2.571729000  | 3.801192000  | -1.641816000 |
| 6         | -1.490535000 | -2.827545000 | -1.589375000 | 6 | 1.996489000  | 4.188148000  | -2.869465000 |
| 6         | -1.977901000 | -4.138239000 | -1.502160000 | 6 | 0.832640000  | 3.594166000  | -3.283772000 |
| 6         | -2.646917000 | -4.709330000 | -2.580438000 | 6 | 0.238490000  | 2.584097000  | -2.493948000 |
| 6         | -2.837782000 | -3.979335000 | -3.753190000 | 6 | 1.919160000  | 2.781375000  | -0.911396000 |
| 6         | -2.361986000 | -2.673934000 | -3.845518000 | 6 | 2.456963000  | 2.386228000  | 0.367370000  |
| 6         | -1.694965000 | -2.099674000 | -2.765911000 | 6 | 1.516296000  | 0.025920000  | 3.038486000  |
| 1         | -2.997661000 | 1.162640000  | 4.454367000  | 6 | 1.124949000  | 0.423386000  | 4.465688000  |
| 1         | -4.899021000 | 2.352467000  | 3.374406000  | 6 | 0.221432000  | 1.650071000  | 4.543714000  |
| 1         | -5.919203000 | 3.285792000  | 1.296653000  | 6 | -0.214482000 | 1.966913000  | 5.968564000  |
| 1         | -5.769419000 | 3.721755000  | -1.132834000 | 6 | -1.061506000 | 1.980134000  | -2.929414000 |
| 1         | -4.491604000 | 3.544610000  | -3.267223000 | 6 | -2.221910000 | 2.984386000  | -2.871845000 |
| 1         | -2.441963000 | 2.777375000  | -4.455766000 | 6 | -3.564545000 | 2.388434000  | -3.294797000 |
| 1         | 0.253216000  | 0.784056000  | -2.767090000 | 6 | -3.627581000 | 1.948992000  | -4.753287000 |
| 1         | 0.260140000  | 2.312046000  | -3.658112000 | 6 | -2.135548000 | -0.755563000 | 2.135193000  |
| 1         | -0.576229000 | 0.917506000  | -4.339531000 | 6 | -1.369571000 | -1.904586000 | 2.379885000  |
| 1         | 2.950504000  | -1.861739000 | 3.718229000  | 6 | -1.470471000 | -2.607389000 | 3.574325000  |
| 1         | 4.388624000  | -0.212056000 | 4.917761000  | 6 | -2.363180000 | -2.170076000 | 4.550247000  |
| 1         | 4.665763000  | 2.079130000  | 3.991894000  | 6 | -3.131836000 | -1.029759000 | 4.331762000  |
| 1         | 3.521274000  | 2.715735000  | 1.902013000  | 6 | -3.015134000 | -0.326881000 | 3.134450000  |
| 1         | 2.765082000  | 3.258444000  | -1.888618000 | 6 | -2.741255000 | 1.726703000  | 0.782414000  |
| 1         | 2.482754000  | 5.705048000  | -1.945524000 | 6 | -1.927725000 | 2.761218000  | 1.266926000  |
| 1         | 1.281658000  | 6.871459000  | -0.111980000 | 6 | -2.453906000 | 4.030759000  | 1.484578000  |
| 1         | 0.344709000  | 5.556833000  | 1.778279000  | 6 | -3.793619000 | 4.288169000  | 1.198221000  |
| 1         | 0.593985000  | 3.106570000  | 1.827248000  | 6 | -4.603468000 | 3.271427000  | 0.698376000  |
| 1         | 1.725355000  | -0.703296000 | -2.207993000 | 6 | -4.083404000 | 1.994688000  | 0.493196000  |
| 1         | 3.418955000  | -1.400842000 | -3.864791000 | 6 | -3.053462000 | -0.866197000 | -0.542178000 |
| 1         | 5.700384000  | -0.422728000 | -3.797480000 | 6 | -2.646596000 | -1.218226000 | -1.832955000 |
| 1         | 6.276579000  | 1.251937000  | -2.057115000 | 6 | -3.491429000 | -1.943583000 | -2.670122000 |
| 1         | 4.586783000  | 1.956319000  | -0.406379000 | 6 | -4.749849000 | -2.333335000 | -2.220955000 |
| 1         | 4.120811000  | -2.323556000 | 1.208163000  | 6 | -5.155859000 | -2.010466000 | -0.926927000 |
| 1         | 4.756097000  | -4.016868000 | -0.485444000 | 6 | -4.311590000 | -1.288285000 | -0.089569000 |
| 1         | 3.041725000  | -4.940300000 | -2.032456000 | 6 | 0.172418000  | -3.073250000 | -0.662832000 |
| 1         | 0.706872000  | -4.142732000 | -1.898201000 | 6 | -0.666933000 | -3.164646000 | 0.459202000  |
| 1         | -0.267590000 | -0.451643000 | 2.554671000  | 6 | -1.661651000 | -4.131835000 | 0.549297000  |
| 1         | -1.071050000 | -0.328663000 | 4.136986000  | 6 | -1.819829000 | -5.038434000 | -0.495219000 |
| 1         | -0.012355000 | 0.970535000  | 3.578401000  | 6 | -0.990770000 | -4.981789000 | -1.611998000 |
| 1         | 0.216324000  | -4.082645000 | 1.822966000  | 6 | -0.004443000 | -4.002402000 | -1.692137000 |
| 1         | -0.955629000 | -4.981772000 | 3.802519000  | 6 | 2.741286000  | -2.145310000 | 0.320396000  |
| 1         | -3.237355000 | -4.187496000 | 4.371200000  | 6 | 3.837245000  | -1.275141000 | 0.395225000  |
| 1         | -4.342081000 | -2.479182000 | 2.944351000  | 6 | 4.921898000  | -1.576822000 | 1.211937000  |
| 1         | -3.164827000 | -1.556742000 | 0.979862000  | 6 | 4.919915000  | -2.744927000 | 1.973496000  |
| 1         | -1.837565000 | -4.709646000 | -0.588801000 | 6 | 3.833886000  | -3.613540000 | 1.904662000  |
| 1         | -3.022347000 | -5.725614000 | -2.504547000 | 6 | 2.749745000  | -3.318801000 | 1.079466000  |
| 1         | -3.363153000 | -4.427173000 | -4.591641000 | 6 | 2.059078000  | -1.808174000 | -2.436617000 |
| 1         | -2.516127000 | -2.098962000 | -4.753930000 | 6 | 3.035872000  | -2.760834000 | -2.754992000 |
| 1         | -1.337755000 | -1.076344000 | -2.829528000 | 6 | 3.544245000  | -2.837720000 | -4.048165000 |
|           |              |              |              | 6 | 3.084862000  | -1.965826000 | -5.034747000 |
|           |              |              |              | 6 | 2.118219000  | -1.012294000 | -4.725504000 |
|           |              |              |              | 6 | 1.611494000  | -0.931352000 | -3.430541000 |
|           |              |              |              | 1 | 3.783073000  | 1.334826000  | 3.789308000  |
|           |              |              |              | 1 | 5.013096000  | 3.071559000  | 2.504722000  |
|           |              |              |              | 1 | 5.177111000  | 4.484414000  | 0.457373000  |
| <b>A2</b> |              |              |              |   |              |              |              |
| 29        | 0.324790000  | 0.408546000  | -0.142506000 |   |              |              |              |
| 15        | -1.920924000 | 0.107628000  | 0.526619000  |   |              |              |              |
| 15        | 1.339420000  | -1.662062000 | -0.758918000 |   |              |              |              |

|           |              |              |              |   |              |              |              |
|-----------|--------------|--------------|--------------|---|--------------|--------------|--------------|
| 1         | 4.245744000  | 5.175888000  | -1.728507000 | 6 | 3.054995000  | -3.497611000 | 3.435037000  |
| 1         | 2.475901000  | 4.958619000  | -3.466733000 | 6 | 3.606890000  | -2.347108000 | 3.900022000  |
| 1         | 0.359483000  | 3.883337000  | -4.216573000 | 6 | 3.155828000  | -1.078738000 | 3.419680000  |
| 1         | -0.842948000 | -3.479078000 | 3.731225000  | 6 | 3.720290000  | 0.134412000  | 3.856946000  |
| 1         | -2.447982000 | -2.716936000 | 5.484181000  | 6 | 3.271056000  | 1.320886000  | 3.332752000  |
| 1         | -3.821442000 | -0.682023000 | 5.094589000  | 6 | 2.250077000  | 1.319764000  | 2.357995000  |
| 1         | -3.607427000 | 0.569661000  | 2.975122000  | 6 | 2.117016000  | -0.999889000 | 2.463885000  |
| 1         | -0.874402000 | 2.569214000  | 1.459879000  | 6 | 1.507959000  | -2.223375000 | 1.993658000  |
| 1         | -1.814651000 | 4.821801000  | 1.865670000  | 6 | -1.159512000 | -3.084569000 | -0.389565000 |
| 1         | -4.203037000 | 5.281513000  | 1.356841000  | 6 | 1.732535000  | 2.603775000  | 1.767954000  |
| 1         | -5.645517000 | 3.469642000  | 0.465023000  | 6 | 0.118474000  | -0.548687000 | -3.089194000 |
| 1         | -4.724782000 | 1.214929000  | 0.095138000  | 6 | -1.277671000 | -0.419996000 | -3.078502000 |
| 1         | -1.654017000 | -0.946654000 | -2.178680000 | 6 | -2.059639000 | -0.866326000 | -4.139648000 |
| 1         | -3.159589000 | -2.211971000 | -3.668660000 | 6 | -1.447758000 | -1.427875000 | -5.255055000 |
| 1         | -5.409029000 | -2.899871000 | -2.872105000 | 6 | -0.059220000 | -1.534370000 | -5.306830000 |
| 1         | -6.129720000 | -2.327356000 | -0.565518000 | 6 | 0.711087000  | -1.097995000 | -4.234683000 |
| 1         | -4.629634000 | -1.065241000 | 0.925143000  | 6 | 2.513061000  | -1.145859000 | -1.544884000 |
| 1         | 2.137744000  | -0.878740000 | 3.069838000  | 6 | 3.692242000  | -0.714613000 | -0.919324000 |
| 1         | 0.624109000  | -0.228569000 | 2.461405000  | 6 | 4.732958000  | -1.605981000 | -0.678446000 |
| 1         | 0.612437000  | -0.433817000 | 4.919796000  | 6 | 4.609093000  | -2.945021000 | -1.044206000 |
| 1         | 2.024365000  | 0.591727000  | 5.072962000  | 6 | 3.436917000  | -3.385723000 | -1.651922000 |
| 1         | -0.664214000 | 1.483933000  | 3.917010000  | 6 | 2.394321000  | -2.495010000 | -1.898799000 |
| 1         | 0.741994000  | 2.517880000  | 4.116669000  | 6 | 1.855847000  | 1.564594000  | -2.324797000 |
| 1         | -0.778643000 | 1.132828000  | 6.400656000  | 6 | 1.208599000  | 2.780237000  | -2.077020000 |
| 1         | -0.853308000 | 2.854765000  | 6.003936000  | 6 | 1.681753000  | 3.960599000  | -2.646954000 |
| 1         | 0.650051000  | 2.152293000  | 6.615817000  | 6 | 2.816778000  | 3.941157000  | -3.452647000 |
| 1         | -1.282618000 | 1.130919000  | -2.277525000 | 6 | 3.473240000  | 2.735602000  | -3.695812000 |
| 1         | -0.955250000 | 1.595171000  | -3.951358000 | 6 | 2.992587000  | 1.552173000  | -3.143319000 |
| 1         | -1.990135000 | 3.847522000  | -3.510043000 | 6 | -2.248899000 | 1.995809000  | -0.607584000 |
| 1         | -2.302181000 | 3.365066000  | -1.846525000 | 6 | -2.090530000 | 1.471544000  | -1.901952000 |
| 1         | -2.301224000 | -4.174770000 | 1.424509000  | 6 | -2.133155000 | 2.290595000  | -3.025969000 |
| 1         | -2.596019000 | -5.794910000 | -0.428370000 | 6 | -2.319335000 | 3.660656000  | -2.862322000 |
| 1         | -1.113298000 | -5.693237000 | -2.422446000 | 6 | -2.458556000 | 4.207448000  | -1.590286000 |
| 1         | 0.630473000  | -3.950050000 | -2.570986000 | 6 | -2.424293000 | 3.376400000  | -0.472811000 |
| 1         | -3.802876000 | 1.538501000  | -2.642571000 | 6 | -3.545092000 | -0.198911000 | 0.784800000  |
| 1         | -4.341948000 | 3.139790000  | -3.110456000 | 6 | -4.564494000 | -0.067067000 | -0.161563000 |
| 1         | 3.844946000  | -0.358985000 | -0.190510000 | 6 | -5.712184000 | -0.853400000 | -0.070942000 |
| 1         | 5.766518000  | -0.895561000 | 1.258558000  | 6 | -5.857403000 | -1.766889000 | 0.969466000  |
| 1         | 5.763987000  | -2.977598000 | 2.616151000  | 6 | -4.845218000 | -1.900089000 | 1.919359000  |
| 1         | 3.829580000  | -4.528508000 | 2.490105000  | 6 | -3.691553000 | -1.128671000 | 1.822505000  |
| 1         | 1.913310000  | -4.008938000 | 1.023933000  | 6 | -2.338995000 | 1.827299000  | 2.307144000  |
| 1         | -3.373304000 | 2.775438000  | -5.426806000 | 6 | -3.533994000 | 2.533187000  | 2.506751000  |
| 1         | -4.632993000 | 1.604991000  | -5.014822000 | 6 | -3.752186000 | 3.219209000  | 3.696443000  |
| 1         | -2.939097000 | 1.124000000  | -4.964563000 | 6 | -2.790805000 | 3.191812000  | 4.707417000  |
| 1         | 3.400539000  | -3.439387000 | -1.988791000 | 6 | -1.614081000 | 2.470921000  | 4.528747000  |
| 1         | 4.301851000  | -3.578658000 | -4.286136000 | 6 | -1.389909000 | 1.790050000  | 3.332679000  |
| 1         | 3.485835000  | -2.026635000 | -6.042277000 | 1 | -0.047791000 | -5.422975000 | 0.612672000  |
| 1         | 1.764517000  | -0.325309000 | -5.488779000 | 1 | 1.772462000  | -5.599493000 | 2.279145000  |
| 1         | 0.871947000  | -0.174816000 | -3.183287000 | 1 | 3.402175000  | -4.464915000 | 3.786027000  |
|           |              |              |              | 1 | 4.405496000  | -2.368297000 | 4.635615000  |
|           |              |              |              | 1 | 4.512597000  | 0.119730000  | 4.600297000  |
|           |              |              |              | 1 | 3.701586000  | 2.260494000  | 3.658346000  |
|           |              |              |              | 1 | 0.889327000  | 2.939460000  | 2.388171000  |
|           |              |              |              | 1 | 1.305718000  | 2.370606000  | 0.784071000  |
|           |              |              |              | 1 | -3.138249000 | -0.764263000 | -4.076331000 |
|           |              |              |              | 1 | -2.055616000 | -1.774934000 | -6.084824000 |
|           |              |              |              | 1 | 0.424624000  | -1.960299000 | -6.180128000 |
|           |              |              |              | 1 | 1.791600000  | -1.195850000 | -4.281097000 |
|           |              |              |              | 1 | 3.802774000  | 0.325224000  | -0.623950000 |
|           |              |              |              | 1 | 5.643064000  | -1.251398000 | -0.203308000 |
|           |              |              |              | 1 | 5.421990000  | -3.640072000 | -0.856147000 |
|           |              |              |              | 1 | 3.329574000  | -4.427274000 | -1.940633000 |
| <b>A3</b> |              |              |              |   |              |              |              |
| 29        | 0.089321000  | -0.121042000 | 0.527157000  |   |              |              |              |
| 15        | 1.108405000  | 0.027173000  | -1.646195000 |   |              |              |              |
| 15        | -2.028272000 | 0.841473000  | 0.793797000  |   |              |              |              |
| 8         | -1.912754000 | 0.110818000  | -1.972731000 |   |              |              |              |
| 7         | 0.490099000  | -2.144232000 | 1.105235000  |   |              |              |              |
| 7         | 1.685778000  | 0.180886000  | 1.954882000  |   |              |              |              |
| 6         | -0.062333000 | -3.258467000 | 0.625678000  |   |              |              |              |
| 6         | 0.400578000  | -4.528782000 | 1.028152000  |   |              |              |              |
| 6         | 1.414666000  | -4.627981000 | 1.949458000  |   |              |              |              |
| 6         | 2.000966000  | -3.459991000 | 2.470732000  |   |              |              |              |

|   |              |              |              |   |              |              |              |
|---|--------------|--------------|--------------|---|--------------|--------------|--------------|
| 1 | 1.490785000  | -2.859039000 | -2.378006000 | 6 | -1.324523000 | -1.917476000 | -2.697127000 |
| 1 | 0.325890000  | 2.807453000  | -1.443792000 | 6 | -1.414634000 | -3.184067000 | -3.291738000 |
| 1 | 1.161862000  | 4.894793000  | -2.455657000 | 1 | -0.742990000 | -3.980489000 | -2.982982000 |
| 1 | 3.190633000  | 4.862209000  | -3.890120000 | 6 | -2.352922000 | -3.426072000 | -4.289468000 |
| 1 | 4.359594000  | 2.714261000  | -4.323173000 | 1 | -2.418541000 | -4.412263000 | -4.739494000 |
| 1 | 3.511221000  | 0.619431000  | -3.344050000 | 6 | -3.198198000 | -2.403152000 | -4.720012000 |
| 1 | -2.012760000 | 1.863983000  | -4.015732000 | 1 | -3.925612000 | -2.593922000 | -5.503528000 |
| 1 | -2.349059000 | 4.300148000  | -3.739254000 | 6 | -3.097509000 | -1.135166000 | -4.155175000 |
| 1 | -2.594930000 | 5.276688000  | -1.463903000 | 1 | -3.740048000 | -0.330255000 | -4.500127000 |
| 1 | -2.524566000 | 3.807372000  | 0.517936000  | 6 | -2.163952000 | -0.893898000 | -3.147622000 |
| 1 | -0.686764000 | -2.710630000 | -1.308929000 | 1 | -2.070159000 | 0.099060000  | -2.717484000 |
| 1 | -1.807507000 | -2.267419000 | -0.046986000 | 6 | -0.352152000 | -2.709821000 | -0.062353000 |
| 1 | -4.474605000 | 0.657434000  | -0.964960000 | 6 | -1.400775000 | -3.633878000 | -0.025563000 |
| 1 | -6.498627000 | -0.741249000 | -0.811737000 | 1 | -2.056549000 | -3.731641000 | -0.884218000 |
| 1 | -6.756331000 | -2.371806000 | 1.042775000  | 6 | -1.627974000 | -4.417745000 | 1.102977000  |
| 1 | -4.952142000 | -2.608451000 | 2.735778000  | 1 | -2.450477000 | -5.125796000 | 1.111911000  |
| 1 | -2.906309000 | -1.242202000 | 2.566626000  | 6 | -0.801209000 | -4.283363000 | 2.213734000  |
| 1 | -4.298744000 | 2.537306000  | 1.734611000  | 1 | -0.970490000 | -4.889754000 | 3.098400000  |
| 1 | -4.677939000 | 3.768623000  | 3.839927000  | 6 | 0.248055000  | -3.368319000 | 2.207665000  |
| 1 | -2.966889000 | 3.724081000  | 5.637601000  | 1 | 0.889514000  | -3.257088000 | 3.075063000  |
| 1 | -0.870854000 | 2.432324000  | 5.319745000  | 6 | 0.463743000  | -2.587998000 | 1.076487000  |
| 1 | -0.481702000 | 1.209111000  | 3.196425000  | 6 | 2.010050000  | -1.132761000 | 2.144623000  |
| 6 | -2.012234000 | -4.308745000 | -0.739491000 | 6 | 3.138095000  | -1.729774000 | 2.695540000  |
| 1 | -1.341694000 | -5.119536000 | -1.058865000 | 1 | 3.563628000  | -2.601907000 | 2.210708000  |
| 6 | -2.848649000 | -4.797886000 | 0.442044000  | 6 | 3.712971000  | -1.184621000 | 3.838415000  |
| 1 | -3.410522000 | -5.697495000 | 0.170542000  | 1 | 4.597062000  | -1.647206000 | 4.265539000  |
| 1 | -3.569155000 | -4.028709000 | 0.739837000  | 6 | 3.159602000  | -0.047620000 | 4.422388000  |
| 1 | -2.239472000 | -5.037992000 | 1.319057000  | 1 | 3.601968000  | 0.378931000  | 5.317259000  |
| 6 | -2.917353000 | -3.975602000 | -1.924649000 | 6 | 2.043556000  | 0.553662000  | 3.850325000  |
| 1 | -3.526322000 | -4.841257000 | -2.204096000 | 1 | 1.635322000  | 1.454104000  | 4.299210000  |
| 1 | -2.337365000 | -3.671077000 | -2.802067000 | 6 | 1.451121000  | 0.030794000  | 2.693232000  |
| 1 | -3.598959000 | -3.154535000 | -1.671884000 | 6 | -1.382671000 | 0.222493000  | 2.984379000  |
| 6 | 2.733801000  | 3.759936000  | 1.641582000  | 6 | -1.540835000 | 0.704996000  | 4.291074000  |
| 1 | 3.134972000  | 3.982401000  | 2.640011000  | 1 | -0.878082000 | 1.476185000  | 4.672920000  |
| 6 | 3.900421000  | 3.413600000  | 0.718755000  | 6 | -2.555574000 | 0.210438000  | 5.103055000  |
| 1 | 3.541535000  | 3.206173000  | -0.295819000 | 1 | -2.672182000 | 0.594156000  | 6.112477000  |
| 1 | 4.451720000  | 2.534715000  | 1.069821000  | 6 | -3.420324000 | -0.773576000 | 4.623132000  |
| 1 | 4.608346000  | 4.246526000  | 0.659239000  | 1 | -4.214187000 | -1.154961000 | 5.258960000  |
| 6 | 2.009066000  | 5.016190000  | 1.162932000  | 6 | -3.265698000 | -1.264068000 | 3.330260000  |
| 1 | 1.578165000  | 4.861945000  | 0.167707000  | 1 | -3.938418000 | -2.024445000 | 2.945021000  |
| 1 | 2.700051000  | 5.862626000  | 1.098653000  | 6 | -2.250071000 | -0.767871000 | 2.514747000  |
| 1 | 1.197367000  | 5.293698000  | 1.843879000  | 1 | -2.130176000 | -1.162760000 | 1.510441000  |

#### A4

|    |              |              |              |   |              |             |              |
|----|--------------|--------------|--------------|---|--------------|-------------|--------------|
| 29 | -0.095853000 | 0.632698000  | -0.484670000 | 6 | 0.133072000  | 2.583022000 | 2.272076000  |
| 15 | -0.070982000 | -1.515334000 | -1.419023000 | 6 | 1.369477000  | 3.237269000 | 2.193906000  |
| 15 | -0.018884000 | 0.795393000  | 1.894531000  | 1 | 2.281151000  | 2.667021000 | 2.042779000  |
| 8  | 1.479628000  | -1.668781000 | 0.985095000  | 6 | 1.448569000  | 4.620884000 | 2.327003000  |
| 7  | 1.263330000  | 2.088895000  | -1.293222000 | 1 | 2.417420000  | 5.109280000 | 2.276204000  |
| 7  | -1.480485000 | 2.136470000  | -1.178079000 | 6 | 0.294318000  | 5.374302000 | 2.527669000  |
| 6  | 1.448617000  | -2.113803000 | -2.258337000 | 1 | 0.357587000  | 6.453266000 | 2.632812000  |
| 6  | 1.951445000  | -3.406391000 | -2.081464000 | 6 | -0.941180000 | 4.734684000 | 2.594254000  |
| 1  | 1.494293000  | -4.073312000 | -1.355602000 | 1 | -1.847246000 | 5.312456000 | 2.752474000  |
| 6  | 3.032925000  | -3.847282000 | -2.842092000 | 6 | -1.023397000 | 3.350838000 | 2.464491000  |
| 1  | 3.413682000  | -4.854852000 | -2.702065000 | 1 | -1.994350000 | 2.867514000 | 2.524948000  |
| 6  | 3.621131000  | -3.001997000 | -3.780844000 | 6 | 0.604424000  | 3.119811000 | -1.874777000 |
| 1  | 4.461342000  | -3.349240000 | -4.374745000 | 6 | 1.276644000  | 4.172880000 | -2.537437000 |
| 6  | 3.134308000  | -1.706283000 | -3.950007000 | 6 | 2.681055000  | 4.108973000 | -2.582759000 |
| 1  | 3.594241000  | -1.040587000 | -4.674531000 | 1 | 3.237404000  | 4.891864000 | -3.090630000 |
| 6  | 2.055887000  | -1.262166000 | -3.189485000 | 6 | 3.334734000  | 3.064812000 | -1.974825000 |
| 1  | 1.677326000  | -0.251387000 | -3.324680000 | 1 | 4.416193000  | 3.014787000 | -1.998220000 |
|    |              |              |              | 6 | 2.596247000  | 2.059603000 | -1.316023000 |
|    |              |              |              | 6 | 3.272879000  | 0.936882000 | -0.574602000 |
|    |              |              |              | 1 | 2.684074000  | 0.024289000 | -0.719517000 |

|   |              |              |              |   |              |              |              |
|---|--------------|--------------|--------------|---|--------------|--------------|--------------|
| 1 | 3.210462000  | 1.158918000  | 0.499590000  | 6 | -2.327821000 | -0.908631000 | -0.085446000 |
| 6 | 4.738733000  | 0.687684000  | -0.944853000 | 6 | -2.269197000 | 0.445181000  | -0.595909000 |
| 1 | 4.804304000  | 0.471229000  | -2.018433000 | 6 | 0.388220000  | 2.656118000  | -1.837778000 |
| 1 | 5.326668000  | 1.594021000  | -0.764232000 | 6 | 0.115127000  | -3.545752000 | 0.698645000  |
| 6 | 5.358687000  | -0.443120000 | -0.162304000 | 6 | 3.229561000  | 0.314487000  | -2.317839000 |
| 6 | 5.133251000  | -1.773451000 | -0.529601000 | 6 | 3.600496000  | 1.461082000  | -1.601164000 |
| 1 | 4.507694000  | -1.991911000 | -1.390880000 | 6 | 4.295762000  | 2.503271000  | -2.201221000 |
| 6 | 5.713731000  | -2.818454000 | 0.184581000  | 6 | 4.646559000  | 2.405203000  | -3.545596000 |
| 1 | 5.534474000  | -3.845079000 | -0.123876000 | 6 | 4.286907000  | 1.278012000  | -4.279324000 |
| 6 | 6.529572000  | -2.549276000 | 1.282773000  | 6 | 3.580369000  | 0.243463000  | -3.669951000 |
| 1 | 6.989700000  | -3.363453000 | 1.835641000  | 6 | 1.644582000  | -2.046535000 | -2.798231000 |
| 6 | 6.757839000  | -1.227838000 | 1.660168000  | 6 | 2.262513000  | -3.209128000 | -3.209128000 |
| 1 | 7.396890000  | -1.006499000 | 2.510632000  | 6 | 1.675302000  | -3.947563000 | -4.296675000 |
| 6 | 6.176289000  | -0.185296000 | 0.941475000  | 6 | 0.473381000  | -3.531265000 | -4.862851000 |
| 1 | 6.367164000  | 0.844450000  | 1.235964000  | 6 | -0.152363000 | -2.377432000 | -4.392866000 |
| 6 | 0.541262000  | 5.251053000  | -3.120820000 | 6 | 0.422915000  | -1.645969000 | -3.359107000 |
| 1 | 1.091697000  | 6.039076000  | -3.626192000 | 6 | 3.659474000  | -1.968557000 | -0.682039000 |
| 6 | -0.813272000 | 5.292509000  | -3.031992000 | 6 | 3.514763000  | -2.424841000 | 0.631325000  |
| 1 | -1.376047000 | 6.115000000  | -3.463200000 | 6 | 4.524333000  | -3.168419000 | 1.237833000  |
| 6 | -1.529372000 | 4.251759000  | -2.363148000 | 6 | 5.692234000  | -3.456676000 | 0.537474000  |
| 6 | -0.838416000 | 3.155097000  | -1.798046000 | 6 | 5.855258000  | -2.988893000 | -0.765947000 |
| 6 | -2.931091000 | 4.265877000  | -2.232023000 | 6 | 4.848620000  | -2.243680000 | -1.371561000 |
| 1 | -3.499638000 | 5.093122000  | -2.647640000 | 6 | 3.183026000  | 0.913867000  | 1.936881000  |
| 6 | -3.564071000 | 3.238133000  | -1.576498000 | 6 | 3.906518000  | 1.181896000  | 0.763516000  |
| 1 | -4.641659000 | 3.243356000  | -1.462019000 | 6 | 5.289923000  | 1.055296000  | 0.713806000  |
| 6 | -2.806926000 | 2.168498000  | -1.055279000 | 6 | 5.974004000  | 0.659840000  | 1.860030000  |
| 6 | -3.456416000 | 1.028585000  | -0.320524000 | 6 | 5.283548000  | 0.398138000  | 3.039975000  |
| 1 | -3.529641000 | 1.296632000  | 0.742451000  | 6 | 3.897146000  | 0.523541000  | 3.073208000  |
| 1 | -2.772352000 | 0.173666000  | -0.365108000 | 6 | 0.934541000  | 2.744628000  | 1.853799000  |
| 6 | -4.844077000 | 0.614757000  | -0.828731000 | 6 | 1.896707000  | 3.755187000  | 1.937673000  |
| 1 | -5.550479000 | 1.442660000  | -0.708318000 | 6 | 1.509600000  | 5.094238000  | 1.939603000  |
| 1 | -4.785635000 | 0.397956000  | -1.901971000 | 6 | 0.161881000  | 5.435130000  | 1.863154000  |
| 6 | -5.374755000 | -0.590244000 | -0.093125000 | 6 | -0.803368000 | 4.432084000  | 1.783943000  |
| 6 | -4.976954000 | -1.880536000 | -0.459612000 | 6 | -0.419953000 | 3.095064000  | 1.773895000  |
| 1 | -4.303499000 | -2.011368000 | -1.304013000 | 6 | 0.805168000  | 0.429473000  | 3.508288000  |
| 6 | -5.444142000 | -2.994439000 | 0.233495000  | 6 | 0.975053000  | 1.235043000  | 4.642567000  |
| 1 | -5.129111000 | -3.989555000 | -0.068809000 | 6 | 0.539646000  | 0.791856000  | 5.887350000  |
| 6 | -6.322918000 | -2.835120000 | 1.304255000  | 6 | -0.074850000 | -0.454252000 | 6.012105000  |
| 1 | -6.694665000 | -3.703695000 | 1.840332000  | 6 | -0.258528000 | -1.255417000 | 4.888544000  |
| 6 | -6.728824000 | -1.554946000 | 1.675472000  | 6 | 0.177055000  | -0.812291000 | 3.641448000  |
| 1 | -7.418525000 | -1.420876000 | 2.504188000  | 1 | -1.989587000 | 3.941435000  | -2.078286000 |
| 6 | -6.255790000 | -0.443136000 | 0.981829000  | 1 | -5.632945000 | 1.108233000  | -0.642673000 |
| 1 | -6.579737000 | 0.553241000  | 1.274471000  | 1 | -5.736112000 | -1.193161000 | 0.159355000  |

**B1**

|    |              |              |              |   |              |              |              |
|----|--------------|--------------|--------------|---|--------------|--------------|--------------|
| 29 | 0.549116000  | -0.220237000 | -0.063945000 | 1 | -0.038978000 | -4.624770000 | 0.759037000  |
| 15 | 2.296834000  | -1.002483000 | -1.440123000 | 1 | 4.543242000  | 3.382037000  | -1.614040000 |
| 15 | 1.353193000  | 0.957496000  | 1.842538000  | 1 | 5.191181000  | 3.216157000  | -4.019087000 |
| 8  | 3.153743000  | 1.607954000  | -0.302583000 | 1 | 4.550789000  | 1.203472000  | -5.329653000 |
| 7  | -1.048606000 | 0.946825000  | -0.902168000 | 1 | 3.289746000  | -0.627030000 | -4.251220000 |
| 7  | -1.154187000 | -1.553475000 | 0.127102000  | 1 | 3.197924000  | -3.547031000 | -2.835874000 |
| 6  | -0.964935000 | 2.155392000  | -1.453273000 | 1 | 2.161502000  | -4.851119000 | -4.652789000 |
| 6  | -2.107971000 | 2.945573000  | -1.663989000 | 1 | 0.019986000  | -4.108737000 | -5.663144000 |
| 6  | -3.364574000 | 2.493493000  | -1.309478000 | 1 | -1.095367000 | -2.053425000 | -4.823510000 |
| 6  | -3.468251000 | 1.172941000  | -0.787141000 | 1 | -0.081676000 | -0.763389000 | -2.971687000 |
| 6  | -4.717876000 | 0.547332000  | -0.491406000 | 1 | 2.616443000  | -2.176067000 | 1.187427000  |
| 6  | -4.775814000 | -0.737726000 | -0.053184000 | 1 | 4.400672000  | -3.513086000 | 2.260192000  |
| 6  | -3.589798000 | -1.511581000 | 0.135648000  | 1 | 6.481226000  | -4.034912000 | 1.009388000  |
| 6  | -3.610205000 | -2.871927000 | 0.553064000  | 1 | 6.771162000  | -3.199346000 | -1.310323000 |
| 6  | -2.395110000 | -3.503366000 | 0.735226000  | 1 | 4.995126000  | -1.865678000 | -2.379697000 |
| 6  | -1.183256000 | -2.826594000 | 0.515063000  | 1 | 5.822442000  | 1.263670000  | -0.208110000 |

|   |              |              |              |   |              |              |              |
|---|--------------|--------------|--------------|---|--------------|--------------|--------------|
| 1 | 7.054659000  | 0.559537000  | 1.825010000  | 6 | 0.270692000  | -4.407421000 | -4.468989000 |
| 1 | 5.819815000  | 0.092478000  | 3.932712000  | 6 | 0.305321000  | 3.529352000  | -0.357286000 |
| 1 | 3.360253000  | 0.304898000  | 3.990812000  | 6 | 0.495134000  | 4.256252000  | -1.696805000 |
| 1 | 1.066522000  | 2.613436000  | -0.981746000 | 6 | 1.860210000  | 4.930253000  | -1.835130000 |
| 1 | 0.343413000  | 3.683730000  | -2.202952000 | 6 | 2.104242000  | 6.067334000  | -0.849311000 |
| 1 | 0.813791000  | 2.026650000  | -2.626429000 | 6 | 3.279621000  | -1.338871000 | -1.681313000 |
| 1 | 2.949811000  | 3.499281000  | 2.007836000  | 6 | 3.466382000  | -2.239635000 | -0.622712000 |
| 1 | 2.265581000  | 5.871428000  | 2.005461000  | 6 | 4.084436000  | -3.469584000 | -0.812282000 |
| 1 | -0.137007000 | 6.479259000  | 1.865380000  | 6 | 4.543083000  | -3.814257000 | -2.081780000 |
| 1 | -1.856553000 | 4.690717000  | 1.722842000  | 6 | 4.364891000  | -2.938449000 | -3.149482000 |
| 1 | -1.178402000 | 2.318771000  | 1.706559000  | 6 | 3.734134000  | -1.712148000 | -2.950090000 |
| 1 | 1.443614000  | 2.211108000  | 4.549429000  | 6 | 2.030392000  | 0.914841000  | -2.988138000 |
| 1 | 0.675996000  | 1.421443000  | 6.761738000  | 6 | 0.775065000  | 0.556008000  | -3.499937000 |
| 1 | -0.416931000 | -0.795307000 | 6.984873000  | 6 | 0.366484000  | 1.009276000  | -4.750458000 |
| 1 | -0.747058000 | -2.221178000 | 4.979167000  | 6 | 1.197545000  | 1.845676000  | -5.493944000 |
| 1 | 0.014913000  | -1.422375000 | 2.757900000  | 6 | 2.437839000  | 2.222056000  | -4.984417000 |
| 6 | -4.535747000 | 3.381089000  | -1.490329000 | 6 | 2.856676000  | 1.757826000  | -3.738801000 |
| 6 | -5.404959000 | 3.659686000  | -0.426748000 | 6 | 3.853492000  | 1.263830000  | -0.721763000 |
| 6 | -4.754505000 | 4.003608000  | -2.725738000 | 6 | 3.677444000  | 2.095002000  | 0.389103000  |
| 6 | -6.470769000 | 4.537266000  | -0.599636000 | 6 | 4.727846000  | 2.877336000  | 0.863630000  |
| 1 | -5.230660000 | 3.205408000  | 0.544668000  | 6 | 5.969641000  | 2.829324000  | 0.236710000  |
| 6 | -5.826334000 | 4.873855000  | -2.897973000 | 6 | 6.163672000  | 1.986074000  | -0.856362000 |
| 1 | -4.089032000 | 3.788963000  | -3.557340000 | 6 | 5.115675000  | 1.202644000  | -1.329155000 |
| 6 | -6.686726000 | 5.142972000  | -1.835790000 | 6 | 2.848361000  | -0.642355000 | 2.551278000  |
| 1 | -7.130748000 | 4.751877000  | 0.235638000  | 6 | 3.619683000  | -1.314923000 | 1.589745000  |
| 1 | -5.989941000 | 5.341157000  | -3.864511000 | 6 | 5.006894000  | -1.363223000 | 1.671116000  |
| 1 | -7.521615000 | 5.824346000  | -1.969903000 | 6 | 5.643706000  | -0.738954000 | 2.740144000  |
| 6 | -4.863422000 | -3.628487000 | 0.777024000  | 6 | 4.902829000  | -0.080826000 | 3.717808000  |
| 6 | -5.056613000 | -4.308526000 | 1.986005000  | 6 | 3.514927000  | -0.033313000 | 3.618461000  |
| 6 | -5.842006000 | -3.727081000 | -0.221277000 | 6 | 0.348249000  | -2.100639000 | 2.795925000  |
| 6 | -6.210477000 | -5.056344000 | 2.198949000  | 6 | -1.044986000 | -2.250341000 | 2.772291000  |
| 1 | -4.304197000 | -4.234797000 | 2.766336000  | 6 | -1.630984000 | -3.453532000 | 3.151260000  |
| 6 | -6.990533000 | -4.483157000 | -0.008788000 | 6 | -0.832254000 | -4.527477000 | 3.542694000  |
| 1 | -5.690328000 | -3.229953000 | -1.175181000 | 6 | 0.552875000  | -4.387032000 | 3.564532000  |
| 6 | -7.179979000 | -5.145386000 | 1.202465000  | 6 | 1.142483000  | -3.178195000 | 3.197925000  |
| 1 | -6.352169000 | -5.569525000 | 3.145472000  | 6 | 0.494998000  | 0.642224000  | 3.597083000  |
| 1 | -7.736420000 | -4.559117000 | -0.794387000 | 6 | 0.291644000  | 0.212841000  | 4.914918000  |
| 1 | -8.079094000 | -5.731529000 | 1.367765000  | 6 | -0.112196000 | 1.117728000  | 5.892411000  |
|   |              |              |              | 6 | -0.316066000 | 2.457822000  | 5.566000000  |
|   |              |              |              | 6 | -0.119112000 | 2.892661000  | 4.257680000  |
|   |              |              |              | 6 | 0.279387000  | 1.987195000  | 3.277445000  |

**B2**

|    |              |              |              |   |              |              |              |
|----|--------------|--------------|--------------|---|--------------|--------------|--------------|
| 29 | 0.501482000  | 0.087158000  | 0.006762000  | 1 | -2.379228000 | -4.280234000 | -0.786286000 |
| 15 | 2.441021000  | 0.258207000  | -1.327096000 | 1 | -5.761432000 | -0.903347000 | -0.088061000 |
| 15 | 1.043329000  | -0.488823000 | 2.264537000  | 1 | -5.680685000 | 1.531428000  | 0.083888000  |
| 8  | 2.902924000  | -1.942613000 | 0.602287000  | 1 | -2.084769000 | 4.746111000  | -0.161128000 |
| 7  | -1.194319000 | -1.156248000 | -0.499329000 | 1 | 4.188799000  | -4.146725000 | 0.029676000  |
| 7  | -1.101679000 | 1.539855000  | -0.276304000 | 1 | 5.029260000  | -4.772700000 | -2.235014000 |
| 6  | -1.206309000 | -2.479385000 | -0.630816000 | 1 | 4.712751000  | -3.209293000 | -4.141470000 |
| 6  | -2.412786000 | -3.203527000 | -0.655706000 | 1 | 3.585453000  | -1.038954000 | -3.789545000 |
| 6  | -3.631804000 | -2.567574000 | -0.542794000 | 1 | 0.113214000  | -0.070722000 | -2.905827000 |
| 6  | -3.626309000 | -1.151207000 | -0.383902000 | 1 | -0.605818000 | 0.719694000  | -5.138272000 |
| 6  | -4.813583000 | -0.385386000 | -0.179554000 | 1 | 0.875384000  | 2.209868000  | -6.465073000 |
| 6  | -4.768616000 | 0.970059000  | -0.083580000 | 1 | 3.084790000  | 2.880909000  | -5.556208000 |
| 6  | -3.532633000 | 1.678226000  | -0.179010000 | 1 | 3.822589000  | 2.066019000  | -3.351473000 |
| 6  | -3.449123000 | 3.099816000  | -0.135362000 | 1 | 2.721244000  | 2.113147000  | 0.902981000  |
| 6  | -2.191586000 | 3.665696000  | -0.171139000 | 1 | 4.576409000  | 3.514794000  | 1.729645000  |
| 6  | -1.034839000 | 2.867557000  | -0.249226000 | 1 | 6.790063000  | 3.437317000  | 0.606457000  |
| 6  | -2.323604000 | 0.947646000  | -0.270641000 | 1 | 7.135494000  | 1.932228000  | -1.338122000 |
| 6  | -2.373017000 | -0.493846000 | -0.382839000 | 1 | 5.286858000  | 0.530216000  | -2.165316000 |
| 6  | 0.107536000  | -3.192208000 | -0.748829000 | 1 | 0.275334000  | -3.754388000 | 0.179252000  |
| 6  | 0.228278000  | -4.139190000 | -1.946750000 | 1 | 0.888601000  | -2.429482000 | -0.794932000 |
| 6  | 0.065944000  | -3.452949000 | -3.299560000 | 1 | 1.217068000  | -4.611957000 | -1.896846000 |

|    |              |              |              |   |              |              |              |
|----|--------------|--------------|--------------|---|--------------|--------------|--------------|
| 1  | -0.499551000 | -4.956988000 | -1.860584000 | 6 | -3.243586000 | 2.968175000  | 0.383356000  |
| 1  | 0.784032000  | -2.625761000 | -3.370492000 | 6 | -3.374668000 | 1.560075000  | 0.529339000  |
| 1  | -0.932506000 | -2.999922000 | -3.364471000 | 6 | -4.630978000 | 0.911054000  | 0.732058000  |
| 1  | 1.277973000  | -4.838508000 | -4.451288000 | 6 | -4.715804000 | -0.441375000 | 0.830071000  |
| 1  | 0.143301000  | -3.897898000 | -5.429092000 | 6 | -3.554942000 | -1.265535000 | 0.709243000  |
| 1  | -0.444895000 | -5.236494000 | -4.434038000 | 6 | -3.605449000 | -2.686488000 | 0.753025000  |
| 1  | 1.077200000  | 2.762456000  | -0.249927000 | 6 | -2.411228000 | -3.377061000 | 0.678118000  |
| 1  | 0.423809000  | 4.241181000  | 0.469161000  | 6 | -1.186605000 | -2.703386000 | 0.525376000  |
| 1  | -0.295478000 | 5.008470000  | -1.819513000 | 6 | -2.283223000 | -0.658020000 | 0.577821000  |
| 1  | 0.366063000  | 3.529830000  | -2.508142000 | 6 | -2.189323000 | 0.786906000  | 0.517922000  |
| 1  | 5.579169000  | -1.882297000 | 0.909540000  | 6 | 0.564460000  | 3.210981000  | 0.268639000  |
| 1  | 6.727012000  | -0.774282000 | 2.806329000  | 6 | 0.112025000  | -3.456263000 | 0.418151000  |
| 1  | 5.401941000  | 0.399889000  | 4.553133000  | 6 | 2.274770000  | 1.214222000  | -2.664570000 |
| 1  | 2.939933000  | 0.494247000  | 4.373010000  | 6 | 3.325307000  | 1.630521000  | -1.834245000 |
| 1  | 2.648284000  | 4.173704000  | -1.728966000 | 6 | 4.229929000  | 2.608558000  | -2.236815000 |
| 1  | 1.945740000  | 5.315489000  | -2.858429000 | 6 | 4.114043000  | 3.171610000  | -3.503134000 |
| 1  | -1.675879000 | -1.420481000 | 2.462923000  | 6 | 3.100362000  | 2.750269000  | -4.361564000 |
| 1  | -2.712679000 | -3.552568000 | 3.138060000  | 6 | 2.194133000  | 1.782057000  | -3.943624000 |
| 1  | -1.289170000 | -5.469060000 | 3.832978000  | 6 | -0.518038000 | 0.405162000  | -2.829172000 |
| 1  | 1.180213000  | -5.217605000 | 3.875157000  | 6 | -1.480524000 | -0.597827000 | -3.018505000 |
| 1  | 2.222743000  | -3.074456000 | 3.233629000  | 6 | -2.766644000 | -0.274862000 | -3.439634000 |
| 1  | 1.317651000  | 6.827326000  | -0.919826000 | 6 | -3.118601000 | 1.054781000  | -3.664572000 |
| 1  | 3.060748000  | 6.559865000  | -1.049586000 | 6 | -2.174615000 | 2.058484000  | -3.465731000 |
| 1  | 2.133819000  | 5.714432000  | 0.186947000  | 6 | -0.884246000 | 1.738341000  | -3.048665000 |
| 1  | 0.446219000  | -0.830643000 | 5.174564000  | 6 | 1.629205000  | -1.524029000 | -3.051559000 |
| 1  | -0.268724000 | 0.775551000  | 6.911236000  | 6 | 2.529557000  | -2.418013000 | -2.461572000 |
| 1  | -0.633282000 | 3.160791000  | 6.3307701000 | 6 | 3.043470000  | -3.487577000 | -3.192295000 |
| 1  | -0.283489000 | 3.934253000  | 3.997409000  | 6 | 2.648359000  | -3.685541000 | -4.512280000 |
| 1  | 0.416401000  | 2.322775000  | 2.253303000  | 6 | 1.744457000  | -2.804720000 | -5.104372000 |
| 6  | -4.877033000 | -3.367248000 | -0.591616000 | 6 | 1.243121000  | -1.725401000 | -4.383046000 |
| 6  | -7.177857000 | -4.961653000 | -0.719597000 | 6 | 3.836508000  | -0.793484000 | 0.763695000  |
| 6  | -5.011126000 | -4.491892000 | 0.232697000  | 6 | 4.162068000  | -0.050666000 | -0.384238000 |
| 6  | -5.908102000 | -3.057630000 | -1.488850000 | 6 | 5.159236000  | -0.468577000 | -1.259854000 |
| 6  | -7.048462000 | -3.852327000 | -1.552779000 | 6 | 5.834183000  | -1.658971000 | -1.002762000 |
| 6  | -6.156406000 | -5.279546000 | 0.172934000  | 6 | 5.514572000  | -2.425057000 | 0.114172000  |
| 1  | -4.217424000 | -4.737456000 | 0.933126000  | 6 | 4.522220000  | -1.990635000 | 0.990232000  |
| 1  | -5.804457000 | -2.206037000 | -2.155236000 | 6 | 3.036586000  | 1.296503000  | 2.613031000  |
| 1  | -7.833347000 | -3.606735000 | -2.259759000 | 6 | 4.326642000  | 1.804741000  | 2.441449000  |
| 1  | -6.251207000 | -6.142151000 | 0.825842000  | 6 | 4.744647000  | 2.918422000  | 3.168609000  |
| 1  | -8.070666000 | -5.577965000 | -0.768097000 | 6 | 3.885092000  | 3.525508000  | 4.080011000  |
| 6  | -4.642039000 | 3.974504000  | -0.068762000 | 6 | 2.598255000  | 3.019490000  | 4.259762000  |
| 6  | -6.839524000 | 5.710105000  | 0.029169000  | 6 | 2.172691000  | 1.917921000  | 3.524157000  |
| 6  | -5.677558000 | 3.864696000  | -1.006723000 | 6 | 2.296714000  | -1.346797000 | 3.187572000  |
| 6  | -4.719023000 | 4.970918000  | 0.912489000  | 6 | 3.379084000  | -1.587029000 | 4.045952000  |
| 6  | -5.813386000 | 5.828564000  | 0.964063000  | 6 | 3.223102000  | -2.408285000 | 5.157202000  |
| 6  | -6.766398000 | 4.729602000  | -0.958112000 | 6 | 1.981763000  | -2.981031000 | 5.436539000  |
| 1  | -5.617133000 | 3.115124000  | -1.790663000 | 6 | 0.894949000  | -2.724577000 | 4.606294000  |
| 1  | -3.923300000 | 5.059189000  | 1.647030000  | 6 | 1.052267000  | -1.909501000 | 3.485911000  |
| 1  | -5.864761000 | 6.589553000  | 1.737121000  | 1 | -1.842513000 | 4.564158000  | 0.192720000  |
| 1  | -7.556931000 | 4.639969000  | -1.697260000 | 1 | -5.522921000 | 1.519279000  | 0.831877000  |
| 1  | -7.692284000 | 6.381371000  | 0.067972000  | 1 | -5.674875000 | -0.912541000 | 1.012317000  |
|    |              |              |              | 1 | -2.424771000 | -4.460871000 | 0.697522000  |
|    |              |              |              | 1 | 0.525567000  | -3.555440000 | 1.431604000  |
|    |              |              |              | 1 | 0.818403000  | -2.820244000 | -0.131169000 |
|    |              |              |              | 1 | 5.014571000  | 2.912210000  | -1.551160000 |
| 29 | 0.598519000  | -0.111120000 | 0.286333000  | 1 | 4.819687000  | 3.933238000  | -3.820105000 |
| 15 | 1.085467000  | -0.063181000 | -2.074670000 | 1 | 3.012651000  | 3.177567000  | -5.355488000 |
| 15 | 2.416102000  | -0.208703000 | 1.756115000  | 1 | 1.401900000  | 1.468570000  | -4.616951000 |
| 8  | 3.447140000  | 1.109062000  | -0.561111000 | 1 | -1.223775000 | -1.639095000 | -2.843135000 |
| 7  | -0.956632000 | 1.341190000  | 0.450105000  | 1 | -3.494746000 | -1.066299000 | -3.592577000 |
| 7  | -1.134618000 | -1.372449000 | 0.485806000  | 1 | -4.122181000 | 1.305939000  | -3.995221000 |
| 6  | -0.834295000 | 2.665432000  | 0.369325000  | 1 | -2.438288000 | 3.098074000  | -3.637209000 |
| 6  | -1.967416000 | 3.494712000  | 0.316955000  |   |              |              |              |

**B3**

|   |              |              |              |           |              |              |              |
|---|--------------|--------------|--------------|-----------|--------------|--------------|--------------|
| 1 | -0.162875000 | 2.536539000  | -2.902980000 | 1         | -5.617084000 | 6.748914000  | 1.655543000  |
| 1 | 2.840023000  | -2.276057000 | -1.429991000 | 1         | -7.402154000 | 6.336961000  | -0.021216000 |
| 1 | 3.749892000  | -4.167037000 | -2.724396000 |           |              |              |              |
| 1 | 3.042264000  | -4.523763000 | -5.079469000 |           |              |              |              |
| 1 | 1.432435000  | -2.953994000 | -6.133934000 |           |              |              |              |
| 1 | 0.542717000  | -1.044601000 | -4.857630000 |           |              |              |              |
| 1 | 5.397378000  | 0.123564000  | -2.136723000 |           |              |              |              |
| 1 | 6.609719000  | -1.987366000 | -1.687992000 |           |              |              |              |
| 1 | 6.034924000  | -3.357560000 | 0.307861000  |           |              |              |              |
| 1 | 4.270379000  | -2.594675000 | 1.855732000  |           |              |              |              |
| 1 | 0.940036000  | 2.949322000  | -0.730879000 |           |              |              |              |
| 1 | 1.193763000  | 2.646985000  | 0.968902000  |           |              |              |              |
| 1 | 5.015092000  | 1.328088000  | 1.750581000  |           |              |              |              |
| 1 | 5.750225000  | 3.304055000  | 3.027357000  |           |              |              |              |
| 1 | 4.216163000  | 4.387770000  | 4.651184000  |           |              |              |              |
| 1 | 1.923081000  | 3.484391000  | 4.972391000  |           |              |              |              |
| 1 | 1.166097000  | 1.532021000  | 3.669603000  |           |              |              |              |
| 1 | 4.341964000  | -1.122395000 | 3.850812000  |           |              |              |              |
| 1 | 4.068614000  | -2.594344000 | 5.812911000  |           |              |              |              |
| 1 | 1.862110000  | -3.617168000 | 6.308633000  |           |              |              |              |
| 1 | -0.077452000 | -3.153675000 | 4.829680000  |           |              |              |              |
| 1 | 0.202012000  | -1.691916000 | 2.844723000  |           |              |              |              |
| 6 | 0.766147000  | 4.713563000  | 0.491581000  |           |              |              |              |
| 1 | 0.124534000  | 5.259956000  | -0.214658000 |           |              |              |              |
| 6 | 0.412532000  | 5.146593000  | 1.913669000  |           |              |              |              |
| 1 | 0.532343000  | 6.228747000  | 2.028820000  |           |              |              |              |
| 1 | 1.076126000  | 4.656748000  | 2.634311000  |           |              |              |              |
| 1 | -0.617236000 | 4.894632000  | 2.185930000  |           |              |              |              |
| 6 | 2.213330000  | 5.084476000  | 0.170085000  |           |              |              |              |
| 1 | 2.377496000  | 6.158830000  | 0.300983000  |           |              |              |              |
| 1 | 2.476475000  | 4.824463000  | -0.860621000 |           |              |              |              |
| 1 | 2.905662000  | 4.556356000  | 0.836670000  |           |              |              |              |
| 6 | 0.057415000  | -4.849300000 | -0.223122000 |           |              |              |              |
| 1 | -0.634016000 | -5.472530000 | 0.360868000  |           |              |              |              |
| 6 | -0.435756000 | -4.803776000 | -1.667978000 |           |              |              |              |
| 1 | 0.243933000  | -4.210127000 | -2.289460000 |           |              |              |              |
| 1 | -1.435971000 | -4.364604000 | -1.745311000 |           |              |              |              |
| 1 | -0.482659000 | -5.811743000 | -2.092642000 |           |              |              |              |
| 6 | 1.433517000  | -5.506088000 | -0.134094000 |           |              |              |              |
| 1 | 2.177368000  | -4.928589000 | -0.694116000 |           |              |              |              |
| 1 | 1.410524000  | -6.516120000 | -0.555177000 |           |              |              |              |
| 1 | 1.775146000  | -5.580141000 | 0.903867000  |           |              |              |              |
| 6 | -4.874494000 | -3.442795000 | 0.860040000  |           |              |              |              |
| 6 | -7.225703000 | -4.956992000 | 1.032220000  |           |              |              |              |
| 6 | -5.917881000 | -3.242853000 | -0.053851000 |           |              |              |              |
| 6 | -5.021927000 | -4.417774000 | 1.854656000  |           |              |              |              |
| 6 | -6.192408000 | -5.164825000 | 1.943249000  |           |              |              |              |
| 6 | -7.083446000 | -3.997967000 | 0.031441000  |           |              |              |              |
| 1 | -5.804889000 | -2.509848000 | -0.847719000 |           |              |              |              |
| 1 | -4.219960000 | -4.576742000 | 2.570371000  |           |              |              |              |
| 1 | -6.297276000 | -5.909751000 | 2.726479000  |           |              |              |              |
| 1 | -7.880182000 | -3.839433000 | -0.689259000 |           |              |              |              |
| 1 | -8.137964000 | -5.542208000 | 1.100023000  |           |              |              |              |
| 6 | -4.411060000 | 3.873173000  | 0.288515000  |           |              |              |              |
| 6 | -6.565713000 | 5.649645000  | 0.064324000  |           |              |              |              |
| 6 | -4.489575000 | 5.003776000  | 1.111379000  |           |              |              |              |
| 6 | -5.422638000 | 3.648897000  | -0.655417000 |           |              |              |              |
| 6 | -6.490272000 | 4.533981000  | -0.767242000 |           |              |              |              |
| 6 | -5.563098000 | 5.882262000  | 1.003345000  |           |              |              |              |
| 1 | -3.713070000 | 5.182211000  | 1.850261000  |           |              |              |              |
| 1 | -5.356353000 | 2.791195000  | -1.319212000 |           |              |              |              |
| 1 | -7.262390000 | 4.353869000  | -1.509403000 |           |              |              |              |
|   |              |              |              | <b>B4</b> |              |              |              |
|   |              |              |              | 29        | -0.165343000 | -0.103927000 | 0.096479000  |
|   |              |              |              | 15        | -1.633382000 | -0.337178000 | 1.907081000  |
|   |              |              |              | 15        | -1.111602000 | -0.179228000 | -2.094876000 |
|   |              |              |              | 8         | -3.113484000 | 0.997094000  | -0.156295000 |
|   |              |              |              | 7         | 1.252157000  | 1.502989000  | 0.127057000  |
|   |              |              |              | 7         | 1.693259000  | -1.177809000 | 0.037771000  |
|   |              |              |              | 6         | -2.021982000 | 1.134122000  | 2.934341000  |
|   |              |              |              | 6         | -3.311836000 | 1.418586000  | 3.393221000  |
|   |              |              |              | 1         | -4.151916000 | 0.811842000  | 3.066256000  |
|   |              |              |              | 6         | -3.523011000 | 2.474379000  | 4.278192000  |
|   |              |              |              | 1         | -4.527370000 | 2.685247000  | 4.633979000  |
|   |              |              |              | 6         | -2.451186000 | 3.254222000  | 4.708322000  |
|   |              |              |              | 1         | -2.618302000 | 4.074129000  | 5.400483000  |
|   |              |              |              | 6         | -1.165176000 | 2.985638000  | 4.241009000  |
|   |              |              |              | 1         | -0.327564000 | 3.595607000  | 4.566546000  |
|   |              |              |              | 6         | -0.951664000 | 1.933332000  | 3.354492000  |
|   |              |              |              | 1         | 0.052425000  | 1.725154000  | 2.991391000  |
|   |              |              |              | 6         | -1.205538000 | -1.543617000 | 3.222646000  |
|   |              |              |              | 6         | -2.035377000 | -1.778606000 | 4.328218000  |
|   |              |              |              | 1         | -2.983093000 | -1.255157000 | 4.420173000  |
|   |              |              |              | 6         | -1.646656000 | -2.671499000 | 5.321217000  |
|   |              |              |              | 1         | -2.299854000 | -2.850415000 | 6.170192000  |
|   |              |              |              | 6         | -0.417647000 | -3.325774000 | 5.234014000  |
|   |              |              |              | 1         | -0.114937000 | -4.018470000 | 6.013717000  |
|   |              |              |              | 6         | 0.425560000  | -3.077700000 | 4.155015000  |
|   |              |              |              | 1         | 1.392008000  | -3.569377000 | 4.091720000  |
|   |              |              |              | 6         | 0.032758000  | -2.189498000 | 3.154174000  |
|   |              |              |              | 1         | 0.697566000  | -1.979185000 | 2.321705000  |
|   |              |              |              | 6         | -3.249786000 | -0.886264000 | 1.248452000  |
|   |              |              |              | 6         | -3.905824000 | -2.058404000 | 1.636923000  |
|   |              |              |              | 1         | -3.496392000 | -2.657014000 | 2.443711000  |
|   |              |              |              | 6         | -5.066510000 | -2.479912000 | 0.992870000  |
|   |              |              |              | 1         | -5.557039000 | -3.395048000 | 1.308764000  |
|   |              |              |              | 6         | -5.585484000 | -1.727221000 | -0.055622000 |
|   |              |              |              | 1         | -6.489109000 | -2.048177000 | -0.564988000 |
|   |              |              |              | 6         | -4.951470000 | -0.558377000 | -0.467628000 |
|   |              |              |              | 1         | -5.350010000 | 0.026514000  | -1.289357000 |
|   |              |              |              | 6         | -3.791928000 | -0.147477000 | 0.181749000  |
|   |              |              |              | 6         | -3.255557000 | 1.512527000  | -1.432167000 |
|   |              |              |              | 6         | -4.217380000 | 2.492736000  | -1.647846000 |
|   |              |              |              | 1         | -4.834889000 | 2.817779000  | -0.817325000 |
|   |              |              |              | 6         | -4.351131000 | 3.055276000  | -2.912561000 |
|   |              |              |              | 1         | -5.098067000 | 3.824823000  | -3.079933000 |
|   |              |              |              | 6         | -3.524045000 | 2.637213000  | -3.952412000 |
|   |              |              |              | 1         | -3.627593000 | 3.070106000  | -4.942541000 |
|   |              |              |              | 6         | -2.551356000 | 1.670706000  | -3.720015000 |
|   |              |              |              | 1         | -1.895425000 | 1.369124000  | -4.531035000 |
|   |              |              |              | 6         | -2.388685000 | 1.095352000  | -2.452858000 |
|   |              |              |              | 6         | -1.877081000 | -1.688551000 | -2.810498000 |
|   |              |              |              | 6         | -2.013323000 | -1.865956000 | -4.194488000 |
|   |              |              |              | 1         | -1.616822000 | -1.124567000 | -4.882235000 |
|   |              |              |              | 6         | -2.643990000 | -2.998584000 | -4.697397000 |
|   |              |              |              | 1         | -2.740490000 | -3.128542000 | -5.771461000 |
|   |              |              |              | 6         | -3.149672000 | -3.964022000 | -3.826357000 |
|   |              |              |              | 1         | -3.638402000 | -4.849477000 | -4.222701000 |
|   |              |              |              | 6         | -3.025767000 | -3.792420000 | -2.451162000 |
|   |              |              |              | 1         | -3.408357000 | -4.542141000 | -1.765173000 |



|   |              |              |               |             |              |              |              |
|---|--------------|--------------|---------------|-------------|--------------|--------------|--------------|
| 6 | -2.392390000 | -2.658300000 | -1.945822000  | 1           | 0.014695000  | -6.631993000 | -1.493751000 |
| 1 | -2.307425000 | -2.527988000 | -0.8711219000 | 6           | 5.611737000  | -2.904016000 | 0.280966000  |
| 6 | 0.261953000  | 0.209029000  | -3.245843000  | 6           | 8.079686000  | -4.206839000 | 0.527839000  |
| 6 | 0.665078000  | 1.530857000  | -3.475953000  | 6           | 6.022166000  | -3.838643000 | -0.678018000 |
| 1 | 0.080383000  | 2.357156000  | -3.083143000  | 6           | 6.450738000  | -2.637248000 | 1.371383000  |
| 6 | 1.807318000  | 1.803733000  | -4.223858000  | 6           | 7.674690000  | -3.287600000 | 1.493514000  |
| 1 | 2.096908000  | 2.835385000  | -4.401809000  | 6           | 7.250701000  | -4.480590000 | -0.557851000 |
| 6 | 2.571782000  | 0.762011000  | -4.743893000  | 1           | 5.380169000  | -4.047779000 | -1.529290000 |
| 1 | 3.461423000  | 0.976039000  | -5.328688000  | 1           | 6.131828000  | -1.936492000 | 2.137867000  |
| 6 | 2.186433000  | -0.556010000 | -4.510624000  | 1           | 8.310709000  | -3.079056000 | 2.348659000  |
| 1 | 2.773971000  | -1.375987000 | -4.913433000  | 1           | 7.560848000  | -5.194941000 | -1.314697000 |
| 6 | 1.043329000  | -0.832080000 | -3.765206000  | 1           | 9.037255000  | -4.710143000 | 0.622776000  |
| 1 | 0.754546000  | -1.865880000 | -3.598225000  | 6           | 4.441891000  | 4.372153000  | 0.225490000  |
| 6 | 2.535067000  | 1.068114000  | 0.167086000   | 6           | 6.389117000  | 6.386573000  | 0.223819000  |
| 6 | 3.642338000  | 1.949174000  | 0.220152000   | 6           | 5.459856000  | 4.376293000  | -0.737686000 |
| 6 | 3.374376000  | 3.345413000  | 0.212065000   | 6           | 4.407705000  | 5.395976000  | 1.180632000  |
| 6 | 2.052725000  | 3.747896000  | 0.182745000   | 6           | 5.378527000  | 6.392653000  | 1.182716000  |
| 1 | 1.827862000  | 4.807437000  | 0.166065000   | 6           | 6.424376000  | 5.379174000  | -0.738191000 |
| 6 | 1.005200000  | 2.812643000  | 0.130648000   | 1           | 5.480334000  | 3.605485000  | -1.502952000 |
| 6 | -0.432038000 | 3.248587000  | 0.013361000   | 1           | 3.624063000  | 5.398084000  | 1.933325000  |
| 1 | -1.054298000 | 2.531862000  | 0.560519000   | 1           | 5.345702000  | 7.174333000  | 1.935861000  |
| 1 | -0.729100000 | 3.151390000  | -1.039863000  | 1           | 7.202071000  | 5.376006000  | -1.496149000 |
| 6 | -0.731755000 | 4.677524000  | 0.480392000   | 1           | 7.145237000  | 7.166045000  | 0.224034000  |
| 1 | -0.438159000 | 4.778419000  | 1.532596000   |             |              |              |              |
| 1 | -0.127367000 | 5.390406000  | -0.090341000  |             |              |              |              |
| 6 | -2.182874000 | 5.057549000  | 0.319914000   |             |              |              |              |
| 6 | -3.136529000 | 4.649808000  | 1.257742000   |             |              |              |              |
| 1 | -2.825825000 | 4.055473000  | 2.112596000   |             |              |              |              |
| 6 | -4.474172000 | 5.010672000  | 1.117777000   |             |              |              |              |
| 1 | -5.197667000 | 4.692584000  | 1.863841000   |             |              |              |              |
| 6 | -4.881773000 | 5.785220000  | 0.032432000   |             |              |              |              |
| 1 | -5.923628000 | 6.074373000  | -0.073429000  |             |              |              |              |
| 6 | -3.941028000 | 6.193541000  | -0.910485000  |             |              |              |              |
| 1 | -4.246541000 | 6.802446000  | -1.756988000  |             |              |              |              |
| 6 | -2.603276000 | 5.831683000  | -0.765257000  |             |              |              |              |
| 1 | -1.872723000 | 6.162708000  | -1.500293000  |             |              |              |              |
| 6 | 4.963639000  | 1.411988000  | 0.298279000   |             |              |              |              |
| 1 | 5.802197000  | 2.095154000  | 0.367173000   |             |              |              |              |
| 6 | 5.181657000  | 0.071266000  | 0.286720000   |             |              |              |              |
| 1 | 6.194463000  | -0.312468000 | 0.326728000   |             |              |              |              |
| 6 | 4.096106000  | -0.853455000 | 0.206398000   |             |              |              |              |
| 6 | 2.769822000  | -0.362191000 | 0.138811000   |             |              |              |              |
| 6 | 4.281900000  | -2.263310000 | 0.161908000   |             |              |              |              |
| 6 | 3.161926000  | -3.056551000 | -0.002420000  |             |              |              |              |
| 1 | 3.278434000  | -4.133273000 | -0.047251000  |             |              |              |              |
| 6 | 1.876294000  | -2.493550000 | -0.060440000  |             |              |              |              |
| 6 | 0.650082000  | -3.348321000 | -0.231363000  |             |              |              |              |
| 1 | 0.421896000  | -3.417940000 | -1.303687000  |             |              |              |              |
| 1 | -0.193672000 | -2.809262000 | 0.214683000   |             |              |              |              |
| 6 | 0.737199000  | -4.762453000 | 0.356507000   |             |              |              |              |
| 1 | 1.514842000  | -5.335466000 | -0.159355000  |             |              |              |              |
| 1 | 1.034954000  | -4.696430000 | 1.410012000   |             |              |              |              |
| 6 | -0.569797000 | -5.506906000 | 0.244202000   |             |              |              |              |
| 6 | -1.603147000 | -5.273179000 | 1.158152000   |             |              |              |              |
| 1 | -1.447775000 | -4.564707000 | 1.969140000   |             |              |              |              |
| 6 | -2.816702000 | -5.947617000 | 1.050153000   |             |              |              |              |
| 1 | -3.605368000 | -5.758254000 | 1.773335000   |             |              |              |              |
| 6 | -3.015209000 | -6.872457000 | 0.025572000   |             |              |              |              |
| 1 | -3.958160000 | -7.405808000 | -0.054367000  |             |              |              |              |
| 6 | -1.992459000 | -7.114600000 | -0.888959000  |             |              |              |              |
| 1 | -2.135257000 | -7.837512000 | -1.687366000  |             |              |              |              |
| 6 | -0.781273000 | -6.434689000 | -0.779223000  |             |              |              |              |
|   |              |              |               | <b>B4-1</b> |              |              |              |
|   |              |              |               | 29          | 0.217313000  | -0.152947000 | -0.325376000 |
|   |              |              |               | 15          | 1.899952000  | -0.609813000 | -1.878088000 |
|   |              |              |               | 15          | 0.780952000  | -0.119475000 | 2.012053000  |
|   |              |              |               | 8           | 3.237027000  | 0.547367000  | 0.378236000  |
|   |              |              |               | 7           | -1.036261000 | 1.572497000  | -0.468731000 |
|   |              |              |               | 7           | -1.732363000 | -1.052735000 | -0.383910000 |
|   |              |              |               | 6           | 2.656822000  | 0.785391000  | -2.799496000 |
|   |              |              |               | 6           | 4.037970000  | 0.908752000  | -2.983663000 |
|   |              |              |               | 1           | 4.714250000  | 0.193887000  | -2.523052000 |
|   |              |              |               | 6           | 4.550893000  | 1.945930000  | -3.760528000 |
|   |              |              |               | 1           | 5.624565000  | 2.032520000  | -3.900648000 |
|   |              |              |               | 6           | 3.691376000  | 2.866388000  | -4.356124000 |
|   |              |              |               | 1           | 4.093662000  | 3.674482000  | -4.959771000 |
|   |              |              |               | 6           | 2.314579000  | 2.751918000  | -4.171292000 |
|   |              |              |               | 1           | 1.640911000  | 3.470695000  | -4.628314000 |
|   |              |              |               | 6           | 1.798872000  | 1.718927000  | -3.393835000 |
|   |              |              |               | 1           | 0.724351000  | 1.636813000  | -3.246293000 |
|   |              |              |               | 6           | 1.522451000  | -1.765751000 | -3.250618000 |
|   |              |              |               | 6           | 2.462218000  | -2.083131000 | -4.241863000 |
|   |              |              |               | 1           | 3.459417000  | -1.652823000 | -4.205727000 |
|   |              |              |               | 6           | 2.120694000  | -2.939359000 | -5.282944000 |
|   |              |              |               | 1           | 2.856155000  | -3.182427000 | -6.044164000 |
|   |              |              |               | 6           | 0.835082000  | -3.476694000 | -5.355151000 |
|   |              |              |               | 1           | 0.570606000  | -4.141967000 | -6.171864000 |
|   |              |              |               | 6           | -0.110393000 | -3.149552000 | -4.388139000 |
|   |              |              |               | 1           | -1.116611000 | -3.553800000 | -4.447652000 |
|   |              |              |               | 6           | 0.231600000  | -2.295024000 | -3.341285000 |
|   |              |              |               | 1           | -0.510889000 | -2.021837000 | -2.597569000 |
|   |              |              |               | 6           | 3.298726000  | -1.371791000 | -0.976867000 |
|   |              |              |               | 6           | 3.836409000  | -2.628348000 | -1.271387000 |
|   |              |              |               | 1           | 3.482103000  | -3.168572000 | -2.143657000 |
|   |              |              |               | 6           | 4.812073000  | -3.200367000 | -0.458052000 |
|   |              |              |               | 1           | 5.220472000  | -4.174764000 | -0.706616000 |
|   |              |              |               | 6           | 5.256889000  | -2.517142000 | 0.669221000  |
|   |              |              |               | 1           | 6.012714000  | -2.956938000 | 1.312841000  |
|   |              |              |               | 6           | 4.742239000  | -1.262554000 | 0.985155000  |

|   |              |              |               |             |              |              |              |
|---|--------------|--------------|---------------|-------------|--------------|--------------|--------------|
| 1 | 5.089260000  | -0.729467000 | 1.863436000   | 6           | -3.387222000 | -2.783815000 | -0.377487000 |
| 6 | 3.775231000  | -0.696118000 | 0.160483000   | 1           | -3.607710000 | -3.845131000 | -0.384832000 |
| 6 | 3.289056000  | 1.098738000  | 1.645597000   | 6           | -2.046084000 | -2.350695000 | -0.297374000 |
| 6 | 4.390814000  | 1.875096000  | 1.991855000   | 6           | -0.940863000 | -3.289958000 | -0.159910000 |
| 1 | 5.190005000  | 2.008482000  | 1.270794000   | 1           | 0.042464000  | -2.852851000 | -0.318612000 |
| 6 | 4.440099000  | 2.474660000  | 3.245021000   | 6           | -1.062543000 | -4.589768000 | 0.175713000  |
| 1 | 5.297625000  | 3.082441000  | 3.516567000   | 1           | -2.048877000 | -4.983824000 | 0.415661000  |
| 6 | 3.390597000  | 2.295803000  | 4.144132000   | 6           | 0.026405000  | -5.552975000 | 0.299467000  |
| 1 | 3.426201000  | 2.758658000  | 5.125398000   | 6           | -0.198690000 | -6.740877000 | 1.012784000  |
| 6 | 2.290012000  | 1.527370000  | 3.782588000   | 1           | -1.178928000 | -6.921806000 | 1.446843000  |
| 1 | 1.470634000  | 1.406800000  | 4.484752000   | 6           | 0.816488000  | -7.675663000 | 1.181987000  |
| 6 | 2.211092000  | 0.920153000  | 2.521881000   | 1           | 0.625384000  | -8.584904000 | 1.744240000  |
| 6 | 1.070961000  | -1.646586000 | 2.991952000   | 6           | 2.074043000  | -7.447058000 | 0.627185000  |
| 6 | 0.810467000  | -1.718537000 | 4.367032000   | 1           | 2.867195000  | -8.178229000 | 0.752407000  |
| 1 | 0.366361000  | -0.872904000 | 4.883956000   | 6           | 2.305688000  | -6.280827000 | -0.104160000 |
| 6 | 1.103921000  | -2.878211000 | 5.076809000   | 1           | 3.278525000  | -6.105630000 | -0.554008000 |
| 1 | 0.893712000  | -2.924789000 | 6.141452000   | 6           | 1.293496000  | -5.344533000 | -0.269932000 |
| 6 | 1.665885000  | -3.975810000 | 4.425295000   | 1           | 1.480383000  | -4.454575000 | -0.863579000 |
| 1 | 1.892037000  | -4.880526000 | 4.982208000   | 6           | -5.807442000 | -2.381710000 | -0.641258000 |
| 6 | 1.932715000  | -3.911389000 | 3.060934000   | 6           | -8.395975000 | -3.418889000 | -0.909676000 |
| 1 | 2.362180000  | -4.763827000 | 2.542913000   | 6           | -6.308540000 | -3.295131000 | 0.294554000  |
| 6 | 1.634723000  | -2.751973000 | 2.347494000   | 6           | -6.617891000 | -2.000471000 | -1.719117000 |
| 1 | 1.850923000  | -2.705789000 | 1.283840000   | 6           | -7.902096000 | -2.519037000 | -1.852091000 |
| 6 | -0.661798000 | 0.666965000  | 2.821969000   | 6           | -7.596333000 | -3.805625000 | 0.163504000  |
| 6 | -0.769401000 | 2.059026000  | 2.931195000   | 1           | -5.688673000 | -3.591195000 | 1.136451000  |
| 1 | 0.064054000  | 2.694882000  | 2.647166000   | 1           | -6.231432000 | -1.314065000 | -2.467275000 |
| 6 | -1.943455000 | 2.641639000  | 3.402542000   | 1           | -8.516087000 | -2.222788000 | -2.697397000 |
| 1 | -2.007654000 | 3.722583000  | 3.488297000   | 1           | -7.975728000 | -4.505299000 | 0.902325000  |
| 6 | -3.028288000 | 1.845705000  | 3.762375000   | 1           | -9.400177000 | -3.819117000 | -1.012988000 |
| 1 | -3.941354000 | 2.301945000  | 4.133644000   | 6           | -3.941771000 | 4.734446000  | -0.387126000 |
| 6 | -2.935129000 | 0.460541000  | 3.643836000   | 6           | -5.702272000 | 6.908557000  | -0.252221000 |
| 1 | -3.775914000 | -0.169096000 | 3.920400000   | 6           | -4.899222000 | 4.811005000  | 0.633213000  |
| 6 | -1.763979000 | -0.125587000 | 3.172199000   | 6           | -3.872084000 | 5.764746000  | -1.332487000 |
| 1 | -1.706671000 | -1.206987000 | 3.084093000   | 6           | -4.751056000 | 6.841779000  | -1.267832000 |
| 6 | -2.353632000 | 1.264968000  | -0.479188000  | 6           | -5.771349000 | 5.893189000  | 0.699711000  |
| 6 | -3.372322000 | 2.249226000  | -0.473662000  | 1           | -4.942454000 | 4.031361000  | 1.388933000  |
| 6 | -2.970901000 | 3.616346000  | -0.437555000  | 1           | -3.135125000 | 5.710242000  | -2.129097000 |
| 6 | -1.622736000 | 3.892763000  | -0.447103000  | 1           | -4.693057000 | 7.629152000  | -2.013515000 |
| 1 | -1.295613000 | 4.926046000  | -0.440949000  | 1           | -6.502940000 | 5.945362000  | 1.500620000  |
| 6 | -0.663272000 | 2.856470000  | -0.441337000  | 1           | -6.386366000 | 7.750405000  | -0.200937000 |
| 6 | 0.766449000  | 3.139958000  | -0.395172000  |             |              |              |              |
| 1 | 1.411763000  | 2.294919000  | -0.625964000  |             |              |              |              |
| 6 | 1.294965000  | 4.335717000  | -0.060682000  |             |              |              |              |
| 1 | 0.626560000  | 5.135176000  | 0.256044000   |             |              |              |              |
| 6 | 2.708902000  | 4.696131000  | -0.052445000  |             |              |              |              |
| 6 | 3.686053000  | 3.952249000  | -0.733541000  |             |              |              |              |
| 1 | 3.400783000  | 3.072758000  | -1.301803000  |             |              |              |              |
| 6 | 5.017047000  | 4.348721000  | -0.709679000  |             |              |              |              |
| 1 | 5.757208000  | 3.768729000  | -1.253826000  |             |              |              |              |
| 6 | 5.402240000  | 5.489245000  | -0.004005000  |             |              |              |              |
| 1 | 6.444021000  | 5.796186000  | 0.010053000   |             |              |              |              |
| 6 | 4.441722000  | 6.240939000  | 0.670241000   |             |              |              |              |
| 1 | 4.731445000  | 7.134616000  | 1.215187000   |             |              |              |              |
| 6 | 3.107338000  | 5.852556000  | 0.637378000   |             |              |              |              |
| 1 | 2.358332000  | 6.445712000  | 1.156473000   |             |              |              |              |
| 6 | -4.737898000 | 1.846673000  | -0.5329820000 |             |              |              |              |
| 1 | -5.507699000 | 2.609373000  | -0.553689000  |             |              |              |              |
| 6 | -5.084923000 | 0.530963000  | -0.553528000  |             |              |              |              |
| 1 | -6.130856000 | 0.248064000  | -0.579998000  |             |              |              |              |
| 6 | -4.094879000 | -0.493312000 | -0.522180000  |             |              |              |              |
| 6 | -2.724429000 | -0.136617000 | -0.469624000  |             |              |              |              |
| 6 | -4.419257000 | -1.881907000 | -0.511228000  |             |              |              |              |
|   |              |              |               | <b>B4-2</b> |              |              |              |
|   |              |              |               | 29          | 0.109358000  | -0.229013000 | -0.152199000 |
|   |              |              |               | 15          | 0.370287000  | 1.477955000  | -1.709691000 |
|   |              |              |               | 15          | -0.249332000 | 0.401045000  | 2.134772000  |
|   |              |              |               | 8           | -1.308344000 | 2.605434000  | 0.315553000  |
|   |              |              |               | 7           | -1.242203000 | -1.854489000 | -0.434791000 |
|   |              |              |               | 7           | 1.452943000  | -1.892160000 | -0.129449000 |
|   |              |              |               | 6           | -1.005639000 | 1.963811000  | -2.823754000 |
|   |              |              |               | 6           | -1.348055000 | 3.296343000  | -3.070488000 |
|   |              |              |               | 1           | -0.856951000 | 4.095095000  | -2.521500000 |
|   |              |              |               | 6           | -2.311845000 | 3.605453000  | -4.028773000 |
|   |              |              |               | 1           | -2.569509000 | 4.643853000  | -4.216496000 |
|   |              |              |               | 6           | -2.936912000 | 2.589225000  | -4.748483000 |
|   |              |              |               | 1           | -3.683036000 | 2.833320000  | -5.498773000 |
|   |              |              |               | 6           | -2.609080000 | 1.257610000  | -4.496567000 |
|   |              |              |               | 1           | -3.099645000 | 0.460903000  | -5.048192000 |
|   |              |              |               | 6           | -1.653681000 | 0.945304000  | -3.533076000 |
|   |              |              |               | 1           | -1.402171000 | -0.094841000 | -3.337270000 |
|   |              |              |               | 6           | 1.717966000  | 1.302776000  | -2.942925000 |
|   |              |              |               | 6           | 2.071665000  | 2.333163000  | -3.825335000 |

|   |              |              |              |   |              |              |              |
|---|--------------|--------------|--------------|---|--------------|--------------|--------------|
| 1 | 1.573036000  | 3.296901000  | -3.766906000 | 1 | -5.197608000 | -1.056042000 | -1.077363000 |
| 6 | 3.051816000  | 2.125310000  | -4.789907000 | 6 | -5.189468000 | 1.060408000  | -0.899426000 |
| 1 | 3.322883000  | 2.931528000  | -5.465224000 | 6 | -4.830081000 | 2.271366000  | -1.494803000 |
| 6 | 3.673624000  | 0.880887000  | -4.901122000 | 1 | -4.046447000 | 2.285551000  | -2.247742000 |
| 1 | 4.432409000  | 0.719417000  | -5.661200000 | 6 | -5.458893000 | 3.466521000  | -1.167242000 |
| 6 | 3.310365000  | -0.155749000 | -4.046033000 | 1 | -5.149044000 | 4.370773000  | -1.678989000 |
| 1 | 3.781134000  | -1.130346000 | -4.136847000 | 6 | -6.484419000 | 3.508933000  | -0.199307000 |
| 6 | 2.337843000  | 0.055926000  | -3.069235000 | 6 | -6.858623000 | 2.283168000  | 0.390168000  |
| 1 | 2.046360000  | -0.753528000 | -2.405587000 | 1 | -7.661539000 | 2.246795000  | 1.117353000  |
| 6 | 0.759754000  | 2.980898000  | -0.746633000 | 6 | -6.217900000 | 1.099550000  | 0.045422000  |
| 6 | 1.965727000  | 3.683278000  | -0.830976000 | 1 | -6.542252000 | 0.175523000  | 0.521021000  |
| 1 | 2.706613000  | 3.393309000  | -1.568070000 | 6 | -0.589487000 | -5.507945000 | -0.584000000 |
| 6 | 2.249579000  | 4.729355000  | 0.044266000  | 1 | -1.133161000 | -6.438962000 | -0.696365000 |
| 1 | 3.199532000  | 5.249549000  | -0.029546000 | 6 | 0.765712000  | -5.523255000 | -0.480033000 |
| 6 | 1.319741000  | 5.087679000  | 1.015040000  | 1 | 1.297690000  | -6.467515000 | -0.492435000 |
| 1 | 1.529655000  | 5.903913000  | 1.699757000  | 6 | 1.510678000  | -4.313096000 | -0.334346000 |
| 6 | 0.116068000  | 4.396726000  | 1.130776000  | 6 | 0.820867000  | -3.077716000 | -0.300195000 |
| 1 | -0.603437000 | 4.664438000  | 1.896930000  | 6 | 2.926093000  | -4.282363000 | -0.185547000 |
| 6 | -0.151037000 | 3.344584000  | 0.260655000  | 6 | 3.526768000  | -3.056398000 | 0.033146000  |
| 6 | -1.986166000 | 2.533953000  | 1.518562000  | 1 | 4.603224000  | -3.005800000 | 0.152611000  |
| 6 | -3.054631000 | 3.401003000  | 1.720931000  | 6 | 2.771549000  | -1.871225000 | 0.055651000  |
| 1 | -3.319894000 | 4.098577000  | 0.933719000  | 6 | 3.413782000  | -0.530824000 | 0.281407000  |
| 6 | -3.768255000 | 3.345767000  | 2.912859000  | 1 | 3.413961000  | -0.322965000 | 1.360200000  |
| 1 | -4.605392000 | 4.019186000  | 3.068799000  | 1 | 2.760529000  | 0.227599000  | -0.165066000 |
| 6 | -3.403331000 | 2.433211000  | 3.900325000  | 6 | 4.839648000  | -0.371130000 | -0.266520000 |
| 1 | -3.947173000 | 2.394965000  | 4.839033000  | 1 | 5.526157000  | -1.018771000 | 0.291982000  |
| 6 | -2.344952000 | 1.558754000  | 3.679582000  | 1 | 4.863605000  | -0.707840000 | -1.309425000 |
| 1 | -2.081345000 | 0.839385000  | 4.449012000  | 6 | 5.320062000  | 1.055288000  | -0.188270000 |
| 6 | -1.625829000 | 1.574512000  | 2.476393000  | 6 | 5.299956000  | 1.893589000  | -1.305484000 |
| 6 | 1.080810000  | 1.040330000  | 3.231204000  | 1 | 4.962349000  | 1.500549000  | -2.262360000 |
| 6 | 1.084165000  | 0.809390000  | 4.613460000  | 6 | 5.709413000  | 3.220276000  | -1.238368000 |
| 1 | 0.317773000  | 0.186061000  | 5.064819000  | 1 | 5.687768000  | 3.815567000  | -2.144079000 |
| 6 | 2.077794000  | 1.361783000  | 5.415078000  | 6 | 6.150087000  | 3.784621000  | -0.023127000 |
| 1 | 2.072899000  | 1.172831000  | 6.484700000  | 6 | 6.199489000  | 2.929379000  | 1.098727000  |
| 6 | 3.075499000  | 2.154393000  | 4.848249000  | 1 | 6.570563000  | 3.293945000  | 2.049798000  |
| 1 | 3.850430000  | 2.583702000  | 5.476818000  | 6 | 5.788279000  | 1.605165000  | 1.007854000  |
| 6 | 3.078292000  | 2.390255000  | 3.476559000  | 1 | 5.843350000  | 0.982119000  | 1.898628000  |
| 1 | 3.855412000  | 2.997691000  | 3.022506000  | 6 | 3.767193000  | -5.499622000 | -0.252431000 |
| 6 | 2.087068000  | 1.833281000  | 2.670257000  | 6 | 5.440523000  | -7.742729000 | -0.392176000 |
| 1 | 2.098320000  | 2.022169000  | 1.600564000  | 6 | 4.679102000  | -5.772636000 | 0.774968000  |
| 6 | -0.750456000 | -1.166888000 | 2.944295000  | 6 | 3.710805000  | -6.361519000 | -1.356092000 |
| 6 | -2.085349000 | -1.568341000 | 3.067483000  | 6 | 4.544713000  | -7.473222000 | -1.424847000 |
| 1 | -2.888452000 | -0.886648000 | 2.806069000  | 6 | 5.505522000  | -6.889944000 | 0.707529000  |
| 6 | -2.402008000 | -2.840378000 | 3.540562000  | 1 | 4.726156000  | -5.113062000 | 1.637100000  |
| 1 | -3.444269000 | -3.130649000 | 3.636740000  | 1 | 3.028843000  | -6.145730000 | -2.173756000 |
| 6 | -1.391946000 | -3.731254000 | 3.892097000  | 1 | 4.497604000  | -8.127124000 | -2.290596000 |
| 1 | -1.640567000 | -4.720731000 | 4.264391000  | 1 | 6.200336000  | -7.094933000 | 1.516571000  |
| 6 | -0.058874000 | -3.344070000 | 3.765716000  | 1 | 6.087662000  | -8.613143000 | -0.445861000 |
| 1 | 0.737374000  | -4.030857000 | 4.037992000  | 6 | -3.594722000 | -5.431483000 | -0.686736000 |
| 6 | 0.260300000  | -2.076136000 | 3.290625000  | 6 | -5.286863000 | -7.662432000 | -0.769306000 |
| 1 | 1.304399000  | -1.790133000 | 3.194412000  | 6 | -3.508413000 | -6.425935000 | 0.296870000  |
| 6 | -0.621048000 | -3.059100000 | -0.437614000 | 6 | -4.546271000 | -5.564942000 | -1.705397000 |
| 6 | -1.322477000 | -4.282436000 | -0.547636000 | 6 | -5.382395000 | -6.676446000 | -1.748876000 |
| 6 | -2.741940000 | -4.221840000 | -0.627846000 | 6 | -4.351741000 | -7.531881000 | 0.255548000  |
| 6 | -3.335754000 | -2.974900000 | -0.631485000 | 1 | -2.795634000 | -6.317484000 | 1.109690000  |
| 1 | -4.416896000 | -2.906900000 | -0.670523000 | 1 | -4.617209000 | -4.799783000 | -2.473602000 |
| 6 | -2.568828000 | -1.800250000 | -0.527238000 | 1 | -6.108779000 | -6.772349000 | -2.550468000 |
| 6 | -3.222830000 | -0.449329000 | -0.413222000 | 1 | -4.281473000 | -8.290522000 | 1.029439000  |
| 1 | -2.478569000 | 0.317573000  | -0.656770000 | 1 | -5.941298000 | -8.528435000 | -0.802184000 |
| 1 | -3.475961000 | -0.298091000 | 0.645512000  | 7 | 6.510998000  | 5.115591000  | 0.066739000  |
| 6 | -4.495249000 | -0.232573000 | -1.244761000 | 6 | 7.189680000  | 5.578694000  | 1.256558000  |
| 1 | -4.234365000 | -0.250931000 | -2.309389000 | 1 | 8.151825000  | 5.071717000  | 1.427786000  |

|   |              |             |              |   |              |              |              |
|---|--------------|-------------|--------------|---|--------------|--------------|--------------|
| 1 | 6.567009000  | 5.432426000 | 2.145935000  | 6 | -2.620938000 | -3.978393000 | 1.534041000  |
| 1 | 7.379638000  | 6.648870000 | 1.164511000  | 6 | -1.297144000 | -3.569231000 | 1.394541000  |
| 6 | 6.690113000  | 5.876278000 | -1.150012000 | 6 | 1.455773000  | -2.556758000 | -1.308320000 |
| 1 | 7.482100000  | 5.470491000 | -1.798180000 | 6 | 0.827801000  | -3.500809000 | -2.124037000 |
| 1 | 6.952374000  | 6.903260000 | -0.892368000 | 6 | 1.420743000  | -3.891066000 | -3.323720000 |
| 1 | 5.762136000  | 5.912061000 | -1.731097000 | 6 | 2.640947000  | -3.344287000 | -3.713853000 |
| 7 | -7.090676000 | 4.698719000 | 0.160713000  | 6 | 3.275940000  | -2.407404000 | -2.899397000 |
| 6 | -6.866911000 | 5.870964000 | -0.655508000 | 6 | 2.684142000  | -2.012623000 | -1.703859000 |
| 1 | -7.201473000 | 5.740904000 | -1.696446000 | 6 | 1.723079000  | -2.705192000 | 1.540874000  |
| 1 | -5.805405000 | 6.141424000 | -0.673601000 | 6 | 2.045430000  | -4.067880000 | 1.502484000  |
| 1 | -7.409725000 | 6.713847000 | -0.225453000 | 6 | 2.815846000  | -4.630498000 | 2.513949000  |
| 6 | -8.297234000 | 4.655452000 | 0.956237000  | 6 | 3.276505000  | -3.836042000 | 3.565532000  |
| 1 | -9.121843000 | 4.120538000 | 0.459849000  | 6 | 2.970430000  | -2.478877000 | 3.603514000  |
| 1 | -8.626019000 | 5.675321000 | 1.160698000  | 6 | 2.196357000  | -1.913645000 | 2.590772000  |
| 1 | -8.114038000 | 4.172007000 | 1.922008000  | 1 | 3.050696000  | 1.006138000  | -4.451809000 |

### XYZ Coordinates of the triplet excited states.

#### A1 (T<sub>1</sub>)

|    |              |              |              |
|----|--------------|--------------|--------------|
| 29 | 0.440081000  | 0.508935000  | 0.170612000  |
| 15 | -1.909522000 | 1.071982000  | 0.041843000  |
| 15 | 0.721280000  | -1.907670000 | 0.239449000  |
| 8  | -1.477878000 | -1.429477000 | -1.529880000 |
| 7  | 1.886750000  | 1.278518000  | -1.296006000 |
| 7  | 1.753061000  | 1.751525000  | 1.379243000  |
| 6  | 1.907122000  | 1.008460000  | -2.632520000 |
| 6  | 3.053861000  | 1.257857000  | -3.397076000 |
| 6  | 4.165507000  | 1.825008000  | -2.813857000 |
| 6  | 4.140737000  | 2.166202000  | -1.424540000 |
| 6  | 5.183570000  | 2.789548000  | -0.760863000 |
| 6  | 5.070877000  | 3.131673000  | 0.666285000  |
| 6  | 3.932837000  | 2.810532000  | 1.388226000  |
| 6  | 3.755293000  | 3.106440000  | 2.775638000  |
| 6  | 2.586544000  | 2.731369000  | 3.410817000  |
| 6  | 1.590241000  | 2.052415000  | 2.707291000  |
| 6  | 2.844232000  | 2.124847000  | 0.743449000  |
| 6  | 2.935708000  | 1.829401000  | -0.714122000 |
| 6  | 0.657865000  | 0.425986000  | -3.213738000 |
| 6  | 0.302562000  | 1.619000000  | 3.329567000  |
| 6  | -2.650401000 | 0.673041000  | -1.590552000 |
| 6  | -2.363235000 | -0.573729000 | -2.163376000 |
| 6  | -2.854377000 | -0.935824000 | -3.410233000 |
| 6  | -3.659808000 | -0.040785000 | -4.110969000 |
| 6  | -3.958754000 | 1.204373000  | -3.563955000 |
| 6  | -3.454579000 | 1.558516000  | -2.313907000 |
| 6  | -2.133586000 | 2.882159000  | 0.182997000  |
| 6  | -3.212604000 | 3.499452000  | 0.821850000  |
| 6  | -3.285097000 | 4.890392000  | 0.880997000  |
| 6  | -2.287731000 | 5.670550000  | 0.301496000  |
| 6  | -1.205063000 | 5.060706000  | -0.331175000 |
| 6  | -1.122238000 | 3.672930000  | -0.380885000 |
| 6  | -3.116661000 | 0.312911000  | 1.190258000  |
| 6  | -2.633853000 | -0.401800000 | 2.289065000  |
| 6  | -3.517352000 | -1.035157000 | 3.160332000  |
| 6  | -4.888855000 | -0.959229000 | 2.935190000  |
| 6  | -5.378417000 | -0.258434000 | 1.832901000  |
| 6  | -4.497072000 | 0.369632000  | 0.959186000  |
| 6  | -0.923418000 | -2.699171000 | 0.367091000  |
| 6  | -1.915923000 | -2.261751000 | -0.522870000 |
| 6  | -3.241505000 | -2.659570000 | -0.395847000 |
| 6  | -3.588351000 | -3.515857000 | 0.645666000  |

|   |              |              |              |
|---|--------------|--------------|--------------|
| 6 | -2.620938000 | -3.978393000 | 1.534041000  |
| 6 | -1.297144000 | -3.569231000 | 1.394541000  |
| 6 | 1.455773000  | -2.556758000 | -1.308320000 |
| 6 | 0.827801000  | -3.500809000 | -2.124037000 |
| 6 | 1.420743000  | -3.891066000 | -3.323720000 |
| 6 | 2.640947000  | -3.344287000 | -3.713853000 |
| 6 | 3.275940000  | -2.407404000 | -2.899397000 |
| 6 | 2.684142000  | -2.012623000 | -1.703859000 |
| 6 | 1.723079000  | -2.705192000 | 1.540874000  |
| 6 | 2.045430000  | -4.067880000 | 1.502484000  |
| 6 | 2.815846000  | -4.630498000 | 2.513949000  |
| 6 | 3.276505000  | -3.836042000 | 3.565532000  |
| 6 | 2.970430000  | -2.478877000 | 3.603514000  |
| 6 | 2.196357000  | -1.913645000 | 2.590772000  |
| 1 | 3.050696000  | 1.006138000  | -4.451809000 |
| 1 | 5.058646000  | 2.032290000  | -3.393872000 |
| 1 | 6.092367000  | 3.042127000  | -1.294376000 |
| 1 | 5.895911000  | 3.637651000  | 1.154005000  |
| 1 | 4.540839000  | 3.628635000  | 3.310921000  |
| 1 | 2.432017000  | 2.958458000  | 4.459737000  |
| 1 | 0.217451000  | 0.525562000  | 3.314950000  |
| 1 | -0.548789000 | 2.022308000  | 2.767284000  |
| 1 | 0.228963000  | 1.954470000  | 4.364787000  |
| 1 | -2.589652000 | -1.906194000 | -3.816924000 |
| 1 | -4.046004000 | -0.316049000 | -5.086305000 |
| 1 | -4.580320000 | 1.904684000  | -4.110942000 |
| 1 | -3.678855000 | 2.536660000  | -1.897803000 |
| 1 | -3.993126000 | 2.900573000  | 1.280025000  |
| 1 | -4.123543000 | 5.363065000  | 1.381744000  |
| 1 | -2.349047000 | 6.752731000  | 0.349061000  |
| 1 | -0.421253000 | 5.665064000  | -0.775657000 |
| 1 | -0.265373000 | 3.194862000  | -0.853853000 |
| 1 | -1.561844000 | -0.490704000 | 2.443832000  |
| 1 | -3.131799000 | -1.599705000 | 4.002924000  |
| 1 | -5.577881000 | -1.456141000 | 3.610358000  |
| 1 | -6.446677000 | -0.209017000 | 1.649542000  |
| 1 | -4.881853000 | 0.891948000  | 0.086819000  |
| 1 | -3.988426000 | -2.291745000 | -1.091213000 |
| 1 | -4.623645000 | -3.819486000 | 0.759901000  |
| 1 | -2.896688000 | -4.646589000 | 2.342354000  |
| 1 | -0.549538000 | -3.913801000 | 2.101855000  |
| 1 | 0.402070000  | -0.516021000 | -2.714782000 |
| 1 | 0.768949000  | 0.238285000  | -4.282834000 |
| 1 | -0.182824000 | 1.114694000  | -3.062910000 |
| 1 | -0.125820000 | -3.927967000 | -1.827252000 |
| 1 | 0.926239000  | -4.622761000 | -3.954264000 |
| 1 | 3.096488000  | -3.646558000 | -4.651090000 |
| 1 | 4.224609000  | -1.974001000 | -3.199539000 |
| 1 | 3.173521000  | -1.266520000 | -1.079741000 |
| 1 | 1.692117000  | -4.683476000 | 0.678839000  |
| 1 | 3.062065000  | -5.686633000 | 2.482281000  |
| 1 | 3.880501000  | -4.277343000 | 4.351507000  |
| 1 | 3.336645000  | -1.858639000 | 4.414840000  |
| 1 | 1.970551000  | -0.849783000 | 2.604836000  |

#### A2 (T<sub>1</sub>)

|    |              |              |              |
|----|--------------|--------------|--------------|
| 29 | 0.437583000  | 0.420868000  | -0.167486000 |
| 15 | -1.845166000 | 0.190902000  | 0.619943000  |
| 15 | 1.258720000  | -1.781114000 | -0.796280000 |
| 8  | -0.385798000 | -2.234749000 | 1.529622000  |
| 7  | 2.089220000  | 1.354333000  | 0.939065000  |

|   |              |              |              |                |              |              |              |
|---|--------------|--------------|--------------|----------------|--------------|--------------|--------------|
| 7 | 0.850801000  | 2.243794000  | -1.322683000 | 1              | 0.006905000  | 4.189974000  | -3.951828000 |
| 6 | 2.684636000  | 0.845546000  | 2.057627000  | 1              | -0.687002000 | -3.313795000 | 3.865958000  |
| 6 | 3.936597000  | 1.321254000  | 2.479855000  | 1              | -2.122695000 | -2.416800000 | 5.708461000  |
| 6 | 4.565931000  | 2.329950000  | 1.788196000  | 1              | -3.455724000 | -0.354489000 | 5.333335000  |
| 6 | 3.932659000  | 2.902787000  | 0.638306000  | 1              | -3.362393000 | 0.803810000  | 3.150763000  |
| 6 | 4.458018000  | 3.957309000  | -0.087085000 | 1              | -0.591426000 | 2.688191000  | 1.132974000  |
| 6 | 3.732737000  | 4.511834000  | -1.241905000 | 1              | -1.390274000 | 5.013108000  | 1.383290000  |
| 6 | 2.525759000  | 3.968639000  | -1.651539000 | 1              | -3.807656000 | 5.530048000  | 1.142541000  |
| 6 | 1.774168000  | 4.451034000  | -2.768231000 | 1              | -5.422413000 | 3.703035000  | 0.686333000  |
| 6 | 0.591435000  | 3.832673000  | -3.110446000 | 1              | -4.640945000 | 1.376090000  | 0.478804000  |
| 6 | 0.133060000  | 2.726096000  | -2.383474000 | 1              | -1.735594000 | -0.910001000 | -2.069859000 |
| 6 | 1.969228000  | 2.840781000  | -0.953666000 | 1              | -3.328259000 | -2.197662000 | -3.444827000 |
| 6 | 2.672521000  | 2.322241000  | 0.255830000  | 1              | -5.550370000 | -2.816370000 | -2.527263000 |
| 6 | 1.928316000  | -0.180496000 | 2.842989000  | 1              | -6.156226000 | -2.164730000 | -0.210217000 |
| 6 | 1.277793000  | 0.420466000  | 4.103256000  | 1              | -4.561025000 | -0.893073000 | 1.177447000  |
| 6 | 0.383069000  | 1.618543000  | 3.795382000  | 1              | 2.604604000  | -0.998675000 | 3.121819000  |
| 6 | -0.389977000 | 2.110383000  | 5.014090000  | 1              | 1.153470000  | -0.607453000 | 2.198260000  |
| 6 | -1.154273000 | 2.039243000  | -2.728549000 | 1              | 0.682419000  | -0.362571000 | 4.589696000  |
| 6 | -2.391440000 | 2.945742000  | -2.613270000 | 1              | 2.058551000  | 0.716769000  | 4.815908000  |
| 6 | -3.701599000 | 2.179998000  | -2.814613000 | 1              | -0.323394000 | 1.333759000  | 3.006665000  |
| 6 | -3.810031000 | 1.480749000  | -4.167890000 | 1              | 0.988922000  | 2.436828000  | 3.383977000  |
| 6 | -2.006913000 | -0.610849000 | 2.263198000  | 1              | -1.018943000 | 1.311064000  | 5.418563000  |
| 6 | -1.259523000 | -1.773136000 | 2.501063000  | 1              | -1.039013000 | 2.952370000  | 4.757091000  |
| 6 | -1.293114000 | -2.424646000 | 3.727183000  | 1              | 0.291199000  | 2.436919000  | 5.806312000  |
| 6 | -2.092021000 | -1.914052000 | 4.748031000  | 1              | -1.275301000 | 1.182042000  | -2.058762000 |
| 6 | -2.840492000 | -0.758374000 | 4.536579000  | 1              | -1.089048000 | 1.641816000  | -3.750037000 |
| 6 | -2.794305000 | -0.109913000 | 3.303609000  | 1              | -2.320364000 | 3.752484000  | -3.354044000 |
| 6 | -2.564980000 | 1.863494000  | 0.826153000  | 1              | -2.395616000 | 3.418959000  | -1.623847000 |
| 6 | -1.655823000 | 2.904659000  | 1.065200000  | 1              | -2.580113000 | -3.788178000 | 1.534084000  |
| 6 | -2.102732000 | 4.216843000  | 1.194499000  | 1              | -3.267486000 | -5.222552000 | -0.371291000 |
| 6 | -3.459259000 | 4.505983000  | 1.058020000  | 1              | -1.898900000 | -5.282984000 | -2.443934000 |
| 6 | -4.367020000 | 3.480060000  | 0.802637000  | 1              | 0.121820000  | -3.873177000 | -2.629360000 |
| 6 | -3.924839000 | 2.163294000  | 0.692632000  | 1              | -3.807350000 | 1.436282000  | -2.014972000 |
| 6 | -3.058694000 | -0.764607000 | -0.370310000 | 1              | -4.534005000 | 2.882328000  | -2.693196000 |
| 6 | -2.715494000 | -1.156640000 | -1.668029000 | 1              | 3.854475000  | -0.689795000 | -0.290794000 |
| 6 | -3.610211000 | -1.891451000 | -2.442653000 | 1              | 5.705125000  | -1.292992000 | 1.227958000  |
| 6 | -4.853420000 | -2.243440000 | -1.924506000 | 1              | 5.508759000  | -3.284554000 | 2.701866000  |
| 6 | -5.195281000 | -1.876563000 | -0.623375000 | 1              | 3.461575000  | -4.683043000 | 2.621375000  |
| 6 | -4.299708000 | -1.148543000 | 0.153632000  | 1              | 1.614730000  | -4.098465000 | 1.086727000  |
| 6 | -0.066717000 | -3.037099000 | -0.657346000 | 1              | -3.637960000 | 2.183180000  | -4.990539000 |
| 6 | -0.844855000 | -3.040437000 | 0.509613000  | 1              | -4.801606000 | 1.040356000  | -4.301027000 |
| 6 | -1.989615000 | -3.820389000 | 0.624657000  | 1              | -3.081108000 | 0.669411000  | -4.259965000 |
| 6 | -2.367721000 | -4.621414000 | -0.449286000 | 1              | 2.999493000  | -3.843518000 | -2.061771000 |
| 6 | -1.602003000 | -4.654139000 | -1.611929000 | 1              | 3.821026000  | -4.101680000 | -4.385138000 |
| 6 | -0.459913000 | -3.864180000 | -1.713066000 | 1              | 3.215688000  | -2.427428000 | -6.110902000 |
| 6 | 2.611929000  | -2.359357000 | 0.291790000  | 1              | 1.794307000  | -0.484603000 | -5.513363000 |
| 6 | 3.771277000  | -1.574994000 | 0.338082000  | 1              | 0.982199000  | -0.215169000 | -3.183222000 |
| 6 | 4.813218000  | -1.910592000 | 1.196575000  |                |              |              |              |
| 6 | 4.700656000  | -3.026659000 | 2.025279000  |                |              |              |              |
| 6 | 3.549911000  | -3.810887000 | 1.981829000  |                |              |              |              |
| 6 | 2.507914000  | -3.481606000 | 1.116291000  |                |              |              |              |
| 6 | 1.923701000  | -2.020765000 | -2.479103000 |                |              |              |              |
| 6 | 2.732768000  | -3.111446000 | -2.819731000 |                |              |              |              |
| 6 | 3.194063000  | -3.255554000 | -4.124266000 |                |              |              |              |
| 6 | 2.852472000  | -2.312848000 | -5.094893000 |                |              |              |              |
| 6 | 2.053459000  | -1.222395000 | -4.761242000 |                |              |              |              |
| 6 | 1.593174000  | -1.074421000 | -3.454010000 |                |              |              |              |
| 1 | 4.395773000  | 0.879657000  | 3.358675000  |                |              |              |              |
| 1 | 5.531921000  | 2.710848000  | 2.103066000  |                |              |              |              |
| 1 | 5.406889000  | 4.394257000  | 0.201201000  |                |              |              |              |
| 1 | 4.157354000  | 5.351758000  | -1.779191000 |                |              |              |              |
| 1 | 2.147028000  | 5.301293000  | -3.329316000 |                |              |              |              |
|   |              |              |              | <b>A3 (T1)</b> |              |              |              |
|   |              |              |              | 29             | -0.046144000 | -0.145381000 | -0.705559000 |
|   |              |              |              | 15             | -1.017243000 | 0.159287000  | 1.577517000  |
|   |              |              |              | 15             | 2.216966000  | 0.602004000  | -0.865251000 |
|   |              |              |              | 8              | 1.973601000  | -0.233302000 | 1.870497000  |
|   |              |              |              | 7              | -0.843442000 | -2.114213000 | -1.138192000 |
|   |              |              |              | 7              | -1.829874000 | 0.306832000  | -1.895344000 |
|   |              |              |              | 6              | -0.337805000 | -3.284946000 | -0.644093000 |
|   |              |              |              | 6              | -1.027022000 | -4.487164000 | -0.836188000 |
|   |              |              |              | 6              | -2.215966000 | -4.501193000 | -1.538426000 |
|   |              |              |              | 6              | -2.756284000 | -3.281634000 | -2.049814000 |
|   |              |              |              | 6              | -3.955606000 | -3.191095000 | -2.737266000 |
|   |              |              |              | 6              | -4.462950000 | -1.887634000 | -3.194905000 |

|   |              |              |              |    |              |              |              |
|---|--------------|--------------|--------------|----|--------------|--------------|--------------|
| 6 | -3.766379000 | -0.720688000 | -2.932538000 | 1  | -0.495384000 | 4.973019000  | 2.467116000  |
| 6 | -4.222020000 | 0.582546000  | -3.304733000 | 1  | -2.538042000 | 5.167697000  | 3.871184000  |
| 6 | -3.496408000 | 1.693187000  | -2.930785000 | 1  | -3.958498000 | 3.172779000  | 4.267556000  |
| 6 | -2.308809000 | 1.552443000  | -2.199226000 | 1  | -3.343495000 | 0.993230000  | 3.286598000  |
| 6 | -2.516089000 | -0.770747000 | -2.223095000 | 1  | 2.098294000  | 1.431826000  | 3.978777000  |
| 6 | -1.989501000 | -2.094667000 | -1.785303000 | 1  | 2.532476000  | 3.864393000  | 3.809079000  |
| 6 | 0.926057000  | -3.142247000 | 0.152790000  | 1  | 2.870547000  | 4.920810000  | 1.584617000  |
| 6 | -1.491039000 | 2.718804000  | -1.718231000 | 1  | 2.807040000  | 3.534117000  | -0.459867000 |
| 6 | -0.134513000 | -0.641230000 | 2.978998000  | 1  | 0.656967000  | -2.703036000 | 1.128509000  |
| 6 | 1.262735000  | -0.741717000 | 2.946126000  | 1  | 1.553526000  | -2.385949000 | -0.340227000 |
| 6 | 1.974254000  | -1.374480000 | 3.959857000  | 1  | 4.594664000  | 0.314009000  | 0.962424000  |
| 6 | 1.286482000  | -1.910280000 | 5.044210000  | 1  | 6.508422000  | -1.240477000 | 0.922150000  |
| 6 | -0.101672000 | -1.800234000 | 5.114845000  | 1  | 6.686447000  | -2.960450000 | -0.857416000 |
| 6 | -0.801490000 | -1.170741000 | 4.090682000  | 1  | 4.917531000  | -3.129642000 | -2.592293000 |
| 6 | -2.555722000 | -0.815173000 | 1.387044000  | 1  | 2.973984000  | -1.605012000 | -2.534846000 |
| 6 | -3.650748000 | -0.201940000 | 0.762924000  | 1  | 4.654073000  | 2.108037000  | -1.682099000 |
| 6 | -4.761063000 | -0.952375000 | 0.385281000  | 1  | 5.154252000  | 3.467920000  | -3.689703000 |
| 6 | -4.788929000 | -2.326078000 | 0.618395000  | 1  | 3.443587000  | 3.742925000  | -5.463734000 |
| 6 | -3.702998000 | -2.944221000 | 1.234874000  | 1  | 1.231786000  | 2.642821000  | -5.238360000 |
| 6 | -2.590414000 | -2.196373000 | 1.613418000  | 1  | 0.727249000  | 1.280234000  | 3.225542000  |
| 6 | -1.573693000 | 1.749363000  | 2.304641000  | 6  | 1.766495000  | -4.399871000 | 0.386354000  |
| 6 | -0.785980000 | 2.881314000  | 2.072048000  | 1  | 1.155217000  | -5.143602000 | 0.915585000  |
| 6 | -1.122740000 | 4.105390000  | 2.647163000  | 6  | 2.260018000  | -5.003499000 | -0.929479000 |
| 6 | -2.266007000 | 4.212733000  | 3.433778000  | 1  | 2.867449000  | -5.893539000 | -0.742186000 |
| 6 | -3.065277000 | 3.091183000  | 3.657047000  | 1  | 2.883784000  | -4.275038000 | -1.457960000 |
| 6 | -2.717031000 | 1.861913000  | 3.105261000  | 1  | 1.438812000  | -5.287473000 | -1.592995000 |
| 6 | 2.429746000  | 1.694120000  | 0.586860000  | 6  | 2.951447000  | -4.031148000 | 1.280720000  |
| 6 | 2.212964000  | 1.125025000  | 1.852822000  | 1  | 3.589630000  | -4.899752000 | 1.466012000  |
| 6 | 2.262036000  | 1.893494000  | 3.011567000  | 1  | 2.611895000  | -3.641252000 | 2.245655000  |
| 6 | 2.503916000  | 3.261671000  | 2.907646000  | 1  | 3.561366000  | -3.256840000 | 0.797850000  |
| 6 | 2.694087000  | 3.853870000  | 1.662845000  | 6  | -2.252548000 | 4.025722000  | -1.457516000 |
| 6 | 2.661117000  | 3.069776000  | 0.510019000  | 1  | -2.714674000 | 4.355108000  | -2.397652000 |
| 6 | 3.653660000  | -0.537940000 | -0.783791000 | 6  | -3.350394000 | 3.849511000  | -0.405976000 |
| 6 | 4.652728000  | -1.644615000 | 0.187954000  | 1  | -2.922356000 | 3.493864000  | 0.538288000  |
| 6 | 5.737845000  | -1.319661000 | 0.162341000  | 1  | -4.111734000 | 3.131675000  | -0.726055000 |
| 6 | 5.838296000  | -2.284242000 | -0.836835000 | 1  | -3.850630000 | 4.802171000  | -0.209120000 |
| 6 | 4.845369000  | -2.379757000 | -1.811015000 | 6  | -1.255762000 | 5.103898000  | -1.030288000 |
| 6 | 3.752696000  | -1.517950000 | -1.778956000 | 1  | -0.749887000 | 4.808221000  | -0.104412000 |
| 6 | 2.643356000  | 1.634868000  | -2.310282000 | 1  | -1.762876000 | 6.055141000  | -0.847171000 |
| 6 | 3.899742000  | 2.237775000  | -2.454559000 | 1  | -0.491876000 | 5.264369000  | -1.797280000 |
| 6 | 4.182123000  | 2.998193000  | -3.583667000 |    |              |              |              |
| 6 | 3.218629000  | 3.151122000  | -4.582578000 |    |              |              |              |
| 6 | 1.976212000  | 2.537216000  | -4.456144000 |    |              |              |              |
| 6 | 1.690414000  | 1.777229000  | -3.322155000 |    |              |              |              |
| 1 | -0.623437000 | -5.407863000 | -0.430026000 | 29 | -0.033161000 | 0.533045000  | -0.721015000 |
| 1 | -2.758597000 | -5.427185000 | -1.698053000 | 15 | -0.659847000 | -1.707122000 | -1.110266000 |
| 1 | -4.536872000 | -4.084253000 | -2.934252000 | 15 | 0.440238000  | 1.050602000  | 1.657541000  |
| 1 | -5.403057000 | -1.845917000 | -3.732720000 | 8  | 1.180263000  | -1.831206000 | 1.082863000  |
| 1 | -5.148828000 | 0.681068000  | -3.860128000 | 7  | 1.420456000  | 1.780263000  | -1.688195000 |
| 1 | -3.851514000 | 2.684785000  | -3.187237000 | 7  | -1.199814000 | 2.294813000  | -1.249862000 |
| 1 | -0.689952000 | 2.917509000  | -2.445748000 | 6  | 0.506135000  | -2.923135000 | -1.830507000 |
| 1 | -0.982407000 | 2.412332000  | -0.790904000 | 6  | 0.808926000  | -4.145043000 | -1.227512000 |
| 1 | 3.054901000  | -1.432278000 | 3.881775000  | 1  | 0.371083000  | -4.403458000 | -0.267504000 |
| 1 | 1.836102000  | -2.405884000 | 5.837027000  | 6  | 1.667563000  | -5.041318000 | -1.863287000 |
| 1 | -0.638572000 | -2.207853000 | 5.964157000  | 1  | 1.894146000  | -5.992977000 | -1.392881000 |
| 1 | -1.884743000 | -1.102942000 | 4.141395000  | 6  | 2.229039000  | -4.721977000 | -3.097459000 |
| 1 | -3.631075000 | 0.867207000  | 0.558802000  | 1  | 2.897686000  | -5.421969000 | -3.587411000 |
| 1 | -5.598384000 | -0.462781000 | -0.102087000 | 6  | 1.932940000  | -3.499638000 | -3.701333000 |
| 1 | -5.649596000 | -2.912931000 | 0.314173000  | 1  | 2.370595000  | -3.244337000 | -4.660664000 |
| 1 | -3.713021000 | -4.014897000 | 1.412257000  | 6  | 1.079257000  | -2.601422000 | -3.067690000 |
| 1 | -1.744378000 | -2.697005000 | 2.076717000  | 1  | 0.852245000  | -1.645893000 | -3.537109000 |
| 1 | 0.093253000  | 2.810413000  | 1.436379000  | 6  | -2.147379000 | -1.962234000 | -2.145441000 |
|   |              |              |              | 6  | -2.738733000 | -3.220081000 | -2.321072000 |

**A4 (T1)**

|   |              |              |              |                |              |              |              |
|---|--------------|--------------|--------------|----------------|--------------|--------------|--------------|
| 1 | -2.360072000 | -4.078062000 | -1.770738000 | 1              | 4.911472000  | -0.329928000 | -2.364114000 |
| 6 | -3.796348000 | -3.377267000 | -3.210577000 | 1              | 5.209705000  | 0.596395000  | -0.896938000 |
| 1 | -4.251938000 | -4.353256000 | -3.340962000 | 6              | 4.938419000  | -1.493701000 | -0.557610000 |
| 6 | -4.255833000 | -2.286215000 | -3.951445000 | 6              | 4.263370000  | -2.689529000 | -0.830108000 |
| 1 | -5.070595000 | -2.415828000 | -4.656256000 | 1              | 3.482747000  | -2.715098000 | -1.587228000 |
| 6 | -3.668902000 | -1.034210000 | -3.788127000 | 6              | 4.591292000  | -3.860119000 | -0.151172000 |
| 1 | -4.023647000 | -0.184330000 | -4.362213000 | 1              | 4.061200000  | -4.778323000 | -0.385015000 |
| 6 | -2.621766000 | -0.871043000 | -2.880758000 | 6              | 5.593036000  | -3.854550000 | 0.819492000  |
| 1 | -2.158021000 | 0.105877000  | -2.754036000 | 1              | 5.849486000  | -4.768273000 | 1.346135000  |
| 6 | -1.063520000 | -2.348624000 | 0.551349000  | 6              | 6.260923000  | -2.667217000 | 1.107073000  |
| 6 | -2.338703000 | -2.756506000 | 0.951921000  | 1              | 7.039612000  | -2.648480000 | 1.863449000  |
| 1 | -3.148791000 | -2.788867000 | 0.229892000  | 6              | 5.932811000  | -1.498002000 | 0.422566000  |
| 6 | -2.592659000 | -3.095539000 | 2.280879000  | 1              | 6.458712000  | -0.574604000 | 0.651237000  |
| 1 | -3.590807000 | -3.402631000 | 2.572093000  | 6              | 1.249298000  | 5.202768000  | -2.962921000 |
| 6 | -1.569803000 | -3.026724000 | 3.221047000  | 1              | 1.869830000  | 5.971570000  | -3.408431000 |
| 1 | -1.760778000 | -3.288838000 | 4.256341000  | 6              | -0.171697000 | 5.494543000  | -2.700827000 |
| 6 | -0.293812000 | -2.606416000 | 2.850971000  | 1              | -0.563264000 | 6.473695000  | -2.951705000 |
| 1 | 0.501938000  | -2.535710000 | 3.584105000  | 6              | -1.001701000 | 4.539396000  | -2.138209000 |
| 6 | -0.052803000 | -2.261332000 | 1.525226000  | 6              | -0.474153000 | 3.245844000  | -1.806873000 |
| 6 | 2.023330000  | -1.237691000 | 2.010848000  | 6              | -2.384735000 | 4.744925000  | -1.829995000 |
| 6 | 3.092664000  | -1.983360000 | 2.489340000  | 1              | -2.840911000 | 5.701741000  | -2.061816000 |
| 1 | 3.232097000  | -2.995286000 | 2.124892000  | 6              | -3.112751000 | 3.741230000  | -1.229654000 |
| 6 | 3.970610000  | -1.408167000 | 3.402576000  | 1              | -4.154839000 | 3.899162000  | -0.974490000 |
| 1 | 4.813402000  | -1.985738000 | 3.767576000  | 6              | -2.503003000 | 2.511062000  | -0.928605000 |
| 6 | 3.769890000  | -0.100246000 | 3.839732000  | 6              | -3.188876000 | 1.404660000  | -0.178707000 |
| 1 | 4.448875000  | 0.346808000  | 4.557479000  | 1              | -3.160242000 | 1.639415000  | 0.895809000  |
| 6 | 2.701860000  | 0.640634000  | 3.342727000  | 1              | -2.595552000 | 0.489417000  | -0.298482000 |
| 1 | 2.565638000  | 1.669444000  | 3.664555000  | 6              | -4.638095000 | 1.106883000  | -0.589070000 |
| 6 | 1.815112000  | 0.091557000  | 2.408878000  | 1              | -5.281246000 | 1.959748000  | -0.344524000 |
| 6 | -0.775234000 | 1.208206000  | 3.020166000  | 1              | -4.687297000 | 0.961485000  | -1.673700000 |
| 6 | -0.587841000 | 2.086003000  | 4.095335000  | 6              | -5.138943000 | -0.133594000 | 0.114828000  |
| 1 | 0.273140000  | 2.748665000  | 4.112810000  | 6              | -5.394912000 | -1.307250000 | -0.596282000 |
| 6 | -1.510456000 | 2.123546000  | 5.135730000  | 1              | -5.253955000 | -1.320800000 | -1.673053000 |
| 1 | -1.361721000 | 2.808915000  | 5.963598000  | 6              | -5.830442000 | -2.459360000 | 0.058535000  |
| 6 | -2.621149000 | 1.278818000  | 5.117220000  | 1              | -6.025928000 | -3.360492000 | -0.515160000 |
| 1 | -3.335435000 | 1.305853000  | 5.933654000  | 6              | -6.011252000 | -2.452337000 | 1.439048000  |
| 6 | -2.813400000 | 0.404967000  | 4.050947000  | 1              | -6.354323000 | -3.345708000 | 1.951404000  |
| 1 | -3.672013000 | -0.259117000 | 4.027742000  | 6              | -5.752107000 | -1.286088000 | 2.160317000  |
| 6 | -1.898595000 | 0.375533000  | 2.999509000  | 1              | -5.899038000 | -1.270332000 | 3.236397000  |
| 1 | -2.062317000 | -0.303607000 | 2.165102000  | 6              | -5.318940000 | -0.138024000 | 1.502981000  |
| 6 | 1.113537000  | 2.741006000  | 1.446516000  | 1              | -5.126291000 | 0.768534000  | 2.072932000  |
| 6 | 2.453600000  | 2.964995000  | 1.107138000  |                |              |              |              |
| 1 | 3.175764000  | 2.154442000  | 1.161713000  |                |              |              |              |
| 6 | 2.871868000  | 4.223001000  | 0.679539000  |                |              |              |              |
| 1 | 3.911993000  | 4.377683000  | 0.410667000  |                |              |              |              |
| 6 | 1.959386000  | 5.271470000  | 0.581245000  |                |              |              |              |
| 1 | 2.284735000  | 6.246795000  | 0.233897000  |                |              |              |              |
| 6 | 0.625464000  | 5.060107000  | 0.924663000  |                |              |              |              |
| 1 | -0.093533000 | 5.869784000  | 0.848392000  |                |              |              |              |
| 6 | 0.204108000  | 3.803049000  | 1.350912000  |                |              |              |              |
| 1 | -0.843929000 | 3.643855000  | 1.596220000  |                |              |              |              |
| 6 | 0.965386000  | 2.957016000  | -2.051223000 |                |              |              |              |
| 6 | 1.797014000  | 3.970236000  | -2.641175000 |                |              |              |              |
| 6 | 3.166824000  | 3.613310000  | -2.835950000 |                |              |              |              |
| 1 | 3.840653000  | 4.329853000  | -3.293231000 |                |              |              |              |
| 6 | 3.625997000  | 2.372067000  | -2.419825000 |                |              |              |              |
| 1 | 4.670508000  | 2.111326000  | -2.546014000 |                |              |              |              |
| 6 | 2.750456000  | 1.466313000  | -1.825144000 |                |              |              |              |
| 6 | 3.131272000  | 0.137078000  | -1.240221000 |                |              |              |              |
| 1 | 2.522163000  | -0.643000000 | -1.719821000 |                |              |              |              |
| 1 | 2.815293000  | 0.136296000  | -0.185665000 |                |              |              |              |
| 6 | 4.613980000  | -0.223633000 | -1.312995000 |                |              |              |              |
|   |              |              |              | <b>B1 (T1)</b> |              |              |              |
|   |              |              |              | 29             | 0.505364000  | -0.286917000 | -0.051080000 |
|   |              |              |              | 15             | 2.415524000  | -1.154796000 | -1.255594000 |
|   |              |              |              | 15             | 1.240742000  | 1.158879000  | 1.762466000  |
|   |              |              |              | 8              | 3.059321000  | 1.633179000  | -0.397317000 |
|   |              |              |              | 7              | -1.120799000 | 0.788714000  | -1.070849000 |
|   |              |              |              | 7              | -1.220212000 | -1.564507000 | 0.254808000  |
|   |              |              |              | 6              | -1.007717000 | 2.000113000  | -1.680636000 |
|   |              |              |              | 6              | -2.124503000 | 2.820234000  | -1.851928000 |
|   |              |              |              | 6              | -3.383847000 | 2.427733000  | -1.422548000 |
|   |              |              |              | 6              | -3.524480000 | 1.095989000  | -0.877623000 |
|   |              |              |              | 6              | -4.733244000 | 0.481826000  | -0.596341000 |
|   |              |              |              | 6              | -4.790881000 | -0.882520000 | -0.076885000 |
|   |              |              |              | 6              | -3.645397000 | -1.631785000 | 0.133081000  |
|   |              |              |              | 6              | -3.625797000 | -2.987525000 | 0.636785000  |
|   |              |              |              | 6              | -2.385020000 | -3.535119000 | 0.975433000  |
|   |              |              |              | 6              | -1.206543000 | -2.834300000 | 0.785448000  |
|   |              |              |              | 6              | -2.363594000 | -1.004838000 | -0.076546000 |
|   |              |              |              | 6              | -2.308342000 | 0.348550000  | -0.692209000 |

|   |              |              |              |                |              |              |              |
|---|--------------|--------------|--------------|----------------|--------------|--------------|--------------|
| 6 | 0.365418000  | 2.413866000  | -2.098361000 | 1              | 3.212989000  | 0.563859000  | 3.968140000  |
| 6 | 0.140716000  | -3.402383000 | 1.096086000  | 1              | 1.005266000  | 2.545311000  | -1.217279000 |
| 6 | 3.264277000  | 0.124146000  | -2.263816000 | 1              | 0.344497000  | 3.351087000  | -2.656584000 |
| 6 | 3.516407000  | 1.372716000  | -1.678346000 | 1              | 0.822608000  | 1.638185000  | -2.723658000 |
| 6 | 4.117439000  | 2.404102000  | -2.386862000 | 1              | 2.854868000  | 3.695193000  | 1.573877000  |
| 6 | 4.487316000  | 2.194073000  | -3.713488000 | 1              | 2.185061000  | 6.016989000  | 1.048375000  |
| 6 | 4.247253000  | 0.962919000  | -4.318041000 | 1              | -0.197132000 | 6.566304000  | 0.634700000  |
| 6 | 3.637264000  | -0.062679000 | -3.598038000 | 1              | -1.920676000 | 4.777776000  | 0.759796000  |
| 6 | 1.867379000  | -2.385256000 | -2.493411000 | 1              | -1.256713000 | 2.456692000  | 1.276078000  |
| 6 | 2.601604000  | -3.513853000 | -2.869082000 | 1              | 1.476461000  | 2.696060000  | 4.297139000  |
| 6 | 2.088615000  | -4.394406000 | -3.820178000 | 1              | 0.640766000  | 2.244195000  | 6.584916000  |
| 6 | 0.846712000  | -4.153022000 | -4.402592000 | 1              | -0.669061000 | 0.189813000  | 7.046476000  |
| 6 | 0.106153000  | -3.033163000 | -4.026569000 | 1              | -1.153839000 | -1.412261000 | 5.216596000  |
| 6 | 0.608727000  | -2.158561000 | -3.068485000 | 1              | -0.324858000 | -0.957489000 | 2.921832000  |
| 6 | 3.820190000  | -1.912970000 | -0.358988000 | 6              | -4.523330000 | 3.359194000  | -1.523052000 |
| 6 | 3.664113000  | -2.207595000 | 0.997671000  | 6              | -5.402252000 | 3.546099000  | -0.444954000 |
| 6 | 4.723820000  | -2.739506000 | 1.728932000  | 6              | -4.710120000 | 4.117799000  | -2.687516000 |
| 6 | 5.946728000  | -2.976409000 | 1.107713000  | 6              | -6.440981000 | 4.466383000  | -0.533462000 |
| 6 | 6.114630000  | -2.672750000 | -0.243322000 | 1              | -5.251752000 | 2.985079000  | 0.472618000  |
| 6 | 5.058894000  | -2.136875000 | -0.973317000 | 6              | -5.755602000 | 5.030113000  | -2.776095000 |
| 6 | 3.064674000  | 1.077789000  | 1.885067000  | 1              | -4.043483000 | 3.971501000  | -3.532141000 |
| 6 | 3.794389000  | 1.231322000  | 0.696698000  | 6              | -6.623772000 | 5.207046000  | -1.700040000 |
| 6 | 5.164703000  | 1.005432000  | 0.643282000  | 1              | -7.105359000 | 4.609325000  | 0.312204000  |
| 6 | 5.826220000  | 0.615105000  | 1.804465000  | 1              | -5.895236000 | 5.601032000  | -3.688001000 |
| 6 | 5.129682000  | 0.470398000  | 3.001582000  | 1              | -7.438086000 | 5.920494000  | -1.769370000 |
| 6 | 3.756587000  | 0.698951000  | 3.038545000  | 6              | -4.848348000 | -3.795123000 | 0.775008000  |
| 6 | 0.844236000  | 2.922457000  | 1.466473000  | 6              | -5.034445000 | -4.600038000 | 1.910071000  |
| 6 | 1.808927000  | 3.930526000  | 1.399090000  | 6              | -5.821998000 | -3.824557000 | -0.237143000 |
| 6 | 1.430776000  | 5.238721000  | 1.101686000  | 6              | -6.165578000 | -5.398013000 | 2.035255000  |
| 6 | 0.091933000  | 5.547716000  | 0.871720000  | 1              | -4.296755000 | -4.577153000 | 2.706652000  |
| 6 | -0.875940000 | 4.546763000  | 0.945051000  | 6              | -6.947254000 | -4.631147000 | -0.113039000 |
| 6 | -0.500427000 | 3.239487000  | 1.237554000  | 1              | -5.676220000 | -3.234683000 | -1.136898000 |
| 6 | 0.650050000  | 0.882937000  | 3.467996000  | 6              | -7.126022000 | -5.416277000 | 1.024921000  |
| 6 | 0.907905000  | 1.792186000  | 4.501998000  | 1              | -6.300288000 | -6.003683000 | 2.925273000  |
| 6 | 0.437278000  | 1.539279000  | 5.785706000  | 1              | -7.682981000 | -4.652252000 | -0.910123000 |
| 6 | -0.300365000 | 0.382557000  | 6.044342000  | 1              | -8.007614000 | -6.040843000 | 1.122722000  |
| 6 | -0.571320000 | -0.518577000 | 5.018923000  |                |              |              |              |
| 6 | -0.098618000 | -0.267155000 | 3.731366000  |                |              |              |              |
| 1 | -1.986279000 | 3.809939000  | -2.275482000 |                |              |              |              |
| 1 | -5.665536000 | 0.992773000  | -0.801033000 |                |              |              |              |
| 1 | -5.760955000 | -1.291555000 | 0.175421000  |                |              |              |              |
| 1 | -2.336271000 | -4.553320000 | 1.347796000  |                |              |              |              |
| 1 | 0.651605000  | -2.788274000 | 1.847190000  |                |              |              |              |
| 1 | 0.769169000  | -3.413513000 | 0.196763000  |                |              |              |              |
| 1 | 0.063668000  | -4.420314000 | 1.480127000  |                |              |              |              |
| 1 | 4.275660000  | 3.357137000  | -1.893126000 |                |              |              |              |
| 1 | 4.955735000  | 2.995949000  | -4.273631000 |                |              |              |              |
| 1 | 4.528474000  | 0.799884000  | -5.352604000 |                |              |              |              |
| 1 | 3.438255000  | -1.016376000 | -4.078672000 |                |              |              |              |
| 1 | 3.568240000  | -3.713390000 | -2.417597000 |                |              |              |              |
| 1 | 2.661907000  | -5.270489000 | -4.104765000 |                |              |              |              |
| 1 | 0.451986000  | -4.840854000 | -5.143040000 |                |              |              |              |
| 1 | -0.865979000 | -2.847171000 | -4.471081000 |                |              |              |              |
| 1 | 0.021177000  | -1.296223000 | -2.756046000 |                |              |              |              |
| 1 | 2.720820000  | -1.988501000 | 1.490933000  |                |              |              |              |
| 1 | 4.596900000  | -2.951506000 | 2.785482000  |                |              |              |              |
| 1 | 6.774619000  | -3.385451000 | 1.677620000  |                |              |              |              |
| 1 | 7.071189000  | -2.845159000 | -0.725522000 |                |              |              |              |
| 1 | 5.202533000  | -1.876283000 | -2.018958000 |                |              |              |              |
| 1 | 5.698022000  | 1.118019000  | -0.294650000 |                |              |              |              |
| 1 | 6.893213000  | 0.422363000  | 1.767290000  |                |              |              |              |
| 1 | 5.650673000  | 0.167471000  | 3.903101000  |                |              |              |              |
|   |              |              |              | <b>B2 (T1)</b> |              |              |              |
|   |              |              |              | 29             | 0.407050000  | 0.024890000  | 0.104082000  |
|   |              |              |              | 15             | 2.294497000  | 0.558925000  | -1.328697000 |
|   |              |              |              | 15             | 1.266148000  | -1.093722000 | 2.087573000  |
|   |              |              |              | 8              | 2.912672000  | -2.059154000 | -0.071622000 |
|   |              |              |              | 7              | -1.369072000 | -1.106701000 | -0.498902000 |
|   |              |              |              | 7              | -1.200218000 | 1.511526000  | 0.158490000  |
|   |              |              |              | 6              | -1.386669000 | -2.440554000 | -0.777748000 |
|   |              |              |              | 6              | -2.591774000 | -3.145231000 | -0.821887000 |
|   |              |              |              | 6              | -3.808447000 | -2.515678000 | -0.612735000 |
|   |              |              |              | 6              | -3.792142000 | -1.104093000 | -0.296065000 |
|   |              |              |              | 6              | -4.913635000 | -0.359933000 | 0.028717000  |
|   |              |              |              | 6              | -4.826328000 | 1.078220000  | 0.279035000  |
|   |              |              |              | 6              | -3.618099000 | 1.750826000  | 0.231112000  |
|   |              |              |              | 6              | -3.463780000 | 3.174117000  | 0.441582000  |
|   |              |              |              | 6              | -2.169207000 | 3.674301000  | 0.543963000  |
|   |              |              |              | 6              | -1.055308000 | 2.854553000  | 0.401961000  |
|   |              |              |              | 6              | -2.406711000 | 0.990079000  | 0.048923000  |
|   |              |              |              | 6              | -2.501229000 | -0.465198000 | -0.265753000 |
|   |              |              |              | 6              | -0.085830000 | -3.099436000 | -1.122396000 |
|   |              |              |              | 6              | 0.062764000  | -3.325859000 | -2.638498000 |
|   |              |              |              | 6              | -0.120571000 | -2.046467000 | -3.451380000 |
|   |              |              |              | 6              | 0.185281000  | -2.236886000 | -4.932887000 |
|   |              |              |              | 6              | 0.338229000  | 3.408301000  | 0.462949000  |



|   |              |              |              |    |              |              |              |
|---|--------------|--------------|--------------|----|--------------|--------------|--------------|
| 6 | 0.644693000  | 4.433796000  | -0.641867000 | 1  | -1.146114000 | -1.673801000 | -3.328304000 |
| 6 | 2.113070000  | 4.865795000  | -0.656501000 | 1  | 1.213844000  | -2.584585000 | -5.071347000 |
| 6 | 2.591131000  | 5.484226000  | 0.655492000  | 1  | 0.069234000  | -1.299314000 | -5.484016000 |
| 6 | 3.047753000  | -0.888681000 | -2.170422000 | 1  | -0.484271000 | -2.978319000 | -5.380281000 |
| 6 | 3.302038000  | -2.032789000 | -1.401125000 | 1  | 1.042977000  | 2.574450000  | 0.382490000  |
| 6 | 3.843990000  | -3.183212000 | -1.959403000 | 1  | 0.501403000  | 3.871698000  | 1.444445000  |
| 6 | 4.146903000  | -3.202115000 | -3.319294000 | 1  | 0.004660000  | 5.314579000  | -0.503456000 |
| 6 | 3.898691000  | -2.079012000 | -4.105083000 | 1  | 0.384507000  | 3.999081000  | -1.614591000 |
| 6 | 3.349272000  | -0.932103000 | -3.534278000 | 1  | 5.579140000  | -1.730091000 | -0.188897000 |
| 6 | 1.714105000  | 1.652233000  | -2.680083000 | 1  | 6.946039000  | -0.817116000 | 1.671110000  |
| 6 | 0.356702000  | 1.551382000  | -3.019377000 | 1  | 5.861057000  | -0.144202000 | 3.802450000  |
| 6 | -0.187812000 | 2.370765000  | -4.004458000 | 1  | 3.410534000  | -0.333794000 | 4.052723000  |
| 6 | 0.611464000  | 3.319466000  | -4.639651000 | 1  | 2.739401000  | 3.997211000  | -0.894734000 |
| 6 | 1.956425000  | 3.438830000  | -4.295470000 | 1  | 2.254224000  | 5.580305000  | -1.475319000 |
| 6 | 2.508936000  | 2.605871000  | -3.324701000 | 1  | -1.354131000 | -2.216915000 | 2.291286000  |
| 6 | 3.780823000  | 1.371126000  | -0.622590000 | 1  | -2.239414000 | -4.521643000 | 2.317911000  |
| 6 | 3.724612000  | 1.878684000  | 0.679341000  | 1  | -0.683240000 | -6.455808000 | 2.188324000  |
| 6 | 4.840169000  | 2.490675000  | 1.246558000  | 1  | 1.763686000  | -6.065670000 | 2.074917000  |
| 6 | 6.022017000  | 2.596033000  | 0.518312000  | 1  | 2.658205000  | -3.761632000 | 2.079111000  |
| 6 | 6.094386000  | 2.072408000  | -0.771891000 | 1  | 1.940488000  | 6.309936000  | 0.963276000  |
| 6 | 4.982820000  | 1.455257000  | -1.336882000 | 1  | 3.607624000  | 5.873643000  | 0.555461000  |
| 6 | 3.096553000  | -1.149363000 | 2.087956000  | 1  | 2.605289000  | 4.747129000  | 1.464555000  |
| 6 | 3.738188000  | -1.543693000 | 0.904580000  | 1  | 1.326137000  | -2.181391000 | 4.861111000  |
| 6 | 5.114412000  | -1.432589000 | 0.745043000  | 1  | 0.754543000  | -1.155837000 | 7.043477000  |
| 6 | 5.872893000  | -0.919205000 | 1.793569000  | 1  | -0.058795000 | 1.184235000  | 7.141886000  |
| 6 | 5.264965000  | -0.539976000 | 2.987641000  | 1  | -0.311833000 | 2.501229000  | 5.055665000  |
| 6 | 3.884596000  | -0.653300000 | 3.130119000  | 1  | 0.246788000  | 1.472163000  | 2.866589000  |
| 6 | 0.713661000  | -2.835660000 | 2.188799000  | 6  | -5.064303000 | -3.283178000 | -0.735044000 |
| 6 | -0.667004000 | -3.060957000 | 2.255193000  | 6  | -7.395896000 | -4.813086000 | -1.029398000 |
| 6 | -1.167758000 | -4.358683000 | 2.263282000  | 6  | -5.172600000 | -4.543745000 | -0.131541000 |
| 6 | -0.293676000 | -5.443085000 | 2.190702000  | 6  | -6.140287000 | -2.804990000 | -1.497972000 |
| 6 | 1.080613000  | -5.224001000 | 2.125094000  | 6  | -7.294211000 | -3.566785000 | -1.645513000 |
| 6 | 1.585712000  | -3.924553000 | 2.127406000  | 6  | -6.331385000 | -5.299676000 | -0.273113000 |
| 6 | 0.839968000  | -0.412268000 | 3.726210000  | 1  | -4.347499000 | -4.920764000 | 0.465447000  |
| 6 | 0.972349000  | -1.154529000 | 4.906128000  | 1  | -6.058226000 | -1.845285000 | -1.999110000 |
| 6 | 0.650762000  | -0.578522000 | 6.130754000  | 1  | -8.113372000 | -3.189087000 | -2.248344000 |
| 6 | 0.193344000  | 0.738852000  | 6.185110000  | 1  | -6.404198000 | -6.268283000 | 0.210151000  |
| 6 | 0.052356000  | 1.480008000  | 5.014872000  | 1  | -8.299215000 | -5.403397000 | -1.141031000 |
| 6 | 0.371348000  | 0.903603000  | 3.786517000  | 6  | -4.617554000 | 4.086991000  | 0.527805000  |
| 1 | -2.568443000 | -4.202906000 | -1.069089000 | 6  | -6.755746000 | 5.899757000  | 0.652558000  |
| 1 | -5.882648000 | -0.835528000 | 0.104644000  | 6  | -5.678690000 | 4.006760000  | -0.388304000 |
| 1 | -5.736568000 | 1.610363000  | 0.523558000  | 6  | -4.644124000 | 5.096689000  | 1.501580000  |
| 1 | -2.019881000 | 4.738957000  | 0.698007000  | 6  | -5.706650000 | 5.991223000  | 1.565702000  |
| 1 | 4.010846000  | -4.047180000 | -1.324574000 | 6  | -6.735232000 | 4.908097000  | -0.327068000 |
| 1 | 4.569819000  | -4.096751000 | -3.763089000 | 1  | -5.656876000 | 3.251188000  | -1.167752000 |
| 1 | 4.125042000  | -2.095472000 | -5.165759000 | 1  | -3.835947000 | 5.161609000  | 2.224061000  |
| 1 | 3.138276000  | -0.065679000 | -4.155459000 | 1  | -5.717929000 | 6.758318000  | 2.332872000  |
| 1 | -0.279862000 | 0.840302000  | -2.496154000 | 1  | -7.541240000 | 4.840456000  | -1.050184000 |
| 1 | -1.238281000 | 2.280952000  | -4.260896000 | 1  | -7.583673000 | 6.599022000  | 0.702344000  |
| 1 | 0.185126000  | 3.970411000  | -5.395783000 |    |              |              |              |
| 1 | 2.578788000  | 4.183077000  | -4.781148000 |    |              |              |              |
| 1 | 3.554520000  | 2.719915000  | -3.056483000 |    |              |              |              |
| 1 | 2.814865000  | 1.775670000  | 1.265951000  | 29 | -0.646255000 | -0.103205000 | -0.509438000 |
| 1 | 4.786286000  | 2.872460000  | 2.260954000  | 15 | -0.690902000 | -0.250423000 | 1.985789000  |
| 1 | 6.891512000  | 3.071659000  | 0.960119000  | 15 | -2.823499000 | -0.143931000 | -1.491248000 |
| 1 | 7.019217000  | 2.137223000  | -1.335532000 | 8  | -3.248934000 | 1.093044000  | 1.067151000  |
| 1 | 5.055517000  | 1.022374000  | -2.331360000 | 7  | 0.893899000  | 1.402150000  | -0.700378000 |
| 1 | -0.008094000 | -4.055144000 | -0.588745000 | 7  | 1.164869000  | -1.278728000 | -0.860119000 |
| 1 | 0.729518000  | -2.463050000 | -0.764163000 | 6  | 0.685297000  | 2.744006000  | -0.519758000 |
| 1 | 1.061961000  | -3.737463000 | -2.829229000 | 6  | 1.761931000  | 3.619302000  | -0.452242000 |
| 1 | -0.661984000 | -4.080194000 | -2.971348000 | 6  | 3.074079000  | 3.169401000  | -0.582393000 |
| 1 | 0.538154000  | -1.272683000 | -3.039470000 | 6  | 3.287108000  | 1.763209000  | -0.838559000 |

**B3 (T<sub>1</sub>)**

|   |              |              |              |   |              |              |              |
|---|--------------|--------------|--------------|---|--------------|--------------|--------------|
| 6 | 4.511424000  | 1.186935000  | -1.126267000 | 1 | -3.200220000 | -4.395685000 | 2.843069000  |
| 6 | 4.653699000  | -0.259824000 | -1.278463000 | 1 | -2.012587000 | -4.950118000 | 4.956577000  |
| 6 | 3.575711000  | -1.114582000 | -1.118396000 | 1 | -0.205418000 | -3.465065000 | 5.782912000  |
| 6 | 3.656052000  | -2.555925000 | -1.154158000 | 1 | 0.406945000  | -1.431820000 | 4.525236000  |
| 6 | 2.470523000  | -3.277044000 | -1.061166000 | 1 | -4.683792000 | -0.006690000 | 3.058438000  |
| 6 | 1.241411000  | -2.644185000 | -0.890444000 | 1 | -5.878842000 | -2.168426000 | 2.885934000  |
| 6 | 2.261602000  | -0.551103000 | -0.946862000 | 1 | -5.787683000 | -3.481622000 | 0.777012000  |
| 6 | 2.113850000  | 0.926910000  | -0.827167000 | 1 | -4.530295000 | -2.610050000 | -1.162332000 |
| 6 | -0.745444000 | 3.140359000  | -0.298707000 | 1 | -1.025330000 | 2.829418000  | 0.721821000  |
| 6 | -0.054342000 | -3.388320000 | -0.714484000 | 1 | -1.371762000 | 2.533064000  | -0.967171000 |
| 6 | -1.651355000 | 1.038266000  | 2.880515000  | 1 | -5.420810000 | 1.215949000  | -0.785924000 |
| 6 | -2.819008000 | 1.554143000  | 2.301871000  | 1 | -6.509386000 | 3.231186000  | -1.702221000 |
| 6 | -3.559068000 | 2.556790000  | 2.919431000  | 1 | -5.420865000 | 4.525933000  | -3.517262000 |
| 6 | -3.141558000 | 3.053923000  | 4.150141000  | 1 | -3.214196000 | 3.802235000  | -4.398168000 |
| 6 | -1.997720000 | 2.540238000  | 4.759573000  | 1 | -2.098116000 | 1.808389000  | -3.459812000 |
| 6 | -1.263104000 | 1.541951000  | 4.128193000  | 1 | -5.204704000 | -0.978274000 | -3.074773000 |
| 6 | 1.060480000  | 0.133922000  | 2.360417000  | 1 | -5.439398000 | -2.472857000 | -5.033989000 |
| 6 | 1.997496000  | -0.904649000 | 2.268361000  | 1 | -3.440816000 | -3.573463000 | -6.005810000 |
| 6 | 3.362011000  | -0.633025000 | 2.320314000  | 1 | -1.198611000 | -3.166391000 | -5.025775000 |
| 6 | 3.809183000  | 0.680204000  | 2.456704000  | 1 | -0.961185000 | -1.669469000 | -3.060020000 |
| 6 | 2.884873000  | 1.719724000  | 2.542699000  | 6 | -1.112610000 | 4.614132000  | -0.488304000 |
| 6 | 1.518516000  | 1.450663000  | 2.490385000  | 1 | -0.524036000 | 5.221378000  | 0.212920000  |
| 6 | -1.042525000 | -1.766433000 | 2.957910000  | 6 | -0.833376000 | 5.089215000  | -1.915072000 |
| 6 | -2.048726000 | -2.617038000 | 2.489219000  | 1 | -1.120022000 | 6.137763000  | -2.035840000 |
| 6 | -2.408691000 | -3.751711000 | 3.213936000  | 1 | -1.420738000 | 4.495528000  | -2.623689000 |
| 6 | -1.743878000 | -4.060086000 | 4.397158000  | 1 | 0.221344000  | 4.992693000  | -2.187617000 |
| 6 | -0.727381000 | -3.225174000 | 4.862448000  | 6 | -2.592975000 | 4.791179000  | -0.146191000 |
| 6 | -0.383821000 | -2.077531000 | 4.154007000  | 1 | -2.905075000 | 5.831394000  | -0.275360000 |
| 6 | -3.902009000 | -0.807808000 | -0.171093000 | 1 | -2.796254000 | 4.496683000  | 0.888461000  |
| 6 | -3.943314000 | -0.098616000 | 1.040900000  | 1 | -3.209469000 | 4.165587000  | -0.804011000 |
| 6 | -4.660618000 | -0.573375000 | 2.134478000  | 6 | 0.036902000  | -4.798975000 | -0.117018000 |
| 6 | -5.327651000 | -1.792189000 | 2.030764000  | 1 | 0.648012000  | -5.422866000 | -0.782867000 |
| 6 | -5.277956000 | -2.527466000 | 0.850499000  | 6 | 0.672964000  | -4.794350000 | 1.275084000  |
| 6 | -4.571054000 | -2.032342000 | -0.244742000 | 1 | 0.096459000  | -4.158243000 | 1.956465000  |
| 6 | -3.686279000 | 1.373129000  | -2.061113000 | 1 | 1.702628000  | -4.424896000 | 1.254421000  |
| 6 | -4.927356000 | 1.783493000  | -1.569195000 | 1 | 0.688680000  | -5.805024000 | 1.693223000  |
| 6 | -5.545443000 | 2.919438000  | -2.090824000 | 6 | -1.365620000 | -5.407379000 | -0.071676000 |
| 6 | -4.934885000 | 3.645622000  | -3.109944000 | 1 | -2.021024000 | -4.802517000 | 0.565117000  |
| 6 | -3.696159000 | 3.239725000  | -3.604966000 | 1 | -1.339817000 | -6.420511000 | 0.338782000  |
| 6 | -3.070022000 | 2.114709000  | -3.076542000 | 1 | -1.811228000 | -5.452607000 | -1.070182000 |
| 6 | -3.069241000 | -1.257083000 | -2.919195000 | 6 | 4.942625000  | -3.273372000 | -1.241947000 |
| 6 | -4.329583000 | -1.470019000 | -3.493030000 | 6 | 7.340218000  | -4.723696000 | -1.359754000 |
| 6 | -4.461065000 | -2.306233000 | -4.595754000 | 6 | 6.025668000  | -2.931783000 | -0.417221000 |
| 6 | -3.334875000 | -2.924100000 | -5.143046000 | 6 | 5.078901000  | -4.358960000 | -2.118959000 |
| 6 | -2.076820000 | -2.699280000 | -4.592493000 | 6 | 6.270036000  | -5.073903000 | -2.180904000 |
| 6 | -1.944359000 | -1.863877000 | -3.483503000 | 6 | 7.212181000  | -3.654526000 | -0.474517000 |
| 1 | 1.582455000  | 4.668938000  | -0.243631000 | 1 | 5.924235000  | -2.112499000 | 0.288536000  |
| 1 | 5.393377000  | 1.803900000  | -1.240830000 | 1 | 4.250474000  | -4.625508000 | -2.768593000 |
| 1 | 5.633159000  | -0.655890000 | -1.513302000 | 1 | 6.364033000  | -5.903184000 | -2.874113000 |
| 1 | 2.515326000  | -4.360962000 | -1.060967000 | 1 | 8.036443000  | -3.386347000 | 0.177997000  |
| 1 | -0.563349000 | -3.450783000 | -1.687442000 | 1 | 8.268789000  | -5.282625000 | -1.407289000 |
| 1 | -0.707408000 | -2.774860000 | -0.074621000 | 6 | 4.189889000  | 4.116692000  | -0.413442000 |
| 1 | -4.451685000 | 2.926567000  | 2.425643000  | 6 | 6.248327000  | 5.979968000  | -0.014205000 |
| 1 | -3.714381000 | 3.836581000  | 4.635493000  | 6 | 4.128987000  | 5.387244000  | -1.005080000 |
| 1 | -1.676066000 | 2.919593000  | 5.723106000  | 6 | 5.297324000  | 3.798489000  | 0.388903000  |
| 1 | -0.362996000 | 1.157147000  | 4.599633000  | 6 | 6.314383000  | 4.724965000  | 0.589290000  |
| 1 | 1.659550000  | -1.931924000 | 2.144378000  | 6 | 5.152670000  | 6.307843000  | -0.811272000 |
| 1 | 4.073532000  | -1.450115000 | 2.249676000  | 1 | 3.282329000  | 5.639990000  | -1.637017000 |
| 1 | 4.873672000  | 0.890316000  | 2.497774000  | 1 | 5.341119000  | 2.828202000  | 0.875396000  |
| 1 | 3.225426000  | 2.746624000  | 2.638956000  | 1 | 7.157512000  | 4.469024000  | 1.222350000  |
| 1 | 0.811320000  | 2.274319000  | 2.541366000  |   |              |              |              |
| 1 | -2.553438000 | -2.397199000 | 1.551776000  |   |              |              |              |

**B4 (T<sub>1</sub>)**

|    |              |              |              |   |              |              |              |
|----|--------------|--------------|--------------|---|--------------|--------------|--------------|
| 29 | 0.227874000  | -0.077821000 | -0.336623000 | 1 | -1.445039000 | 2.741089000  | 2.230619000  |
| 15 | 2.264182000  | -0.291952000 | -1.500136000 | 6 | -3.396014000 | 1.898336000  | 2.519781000  |
| 15 | 0.419908000  | 0.365833000  | 2.083450000  | 1 | -3.892329000 | 2.860643000  | 2.433344000  |
| 8  | 2.691129000  | 1.668263000  | 0.546082000  | 6 | -4.142988000 | 0.741190000  | 2.726678000  |
| 7  | -1.516020000 | 1.130437000  | -0.730434000 | 1 | -5.223783000 | 0.795648000  | 2.815099000  |
| 7  | -1.353041000 | -1.531424000 | -0.344263000 | 6 | -3.495884000 | -0.489874000 | 2.824651000  |
| 6  | 2.882698000  | 1.039185000  | -2.594779000 | 1 | -4.069245000 | -1.398235000 | 2.980031000  |
| 6  | 4.193736000  | 1.518715000  | -2.553413000 | 6 | -2.110097000 | -0.559689000 | 2.718640000  |
| 1  | 4.883194000  | 1.155268000  | -1.796089000 | 1 | -1.617410000 | -1.527426000 | 2.786654000  |
| 6  | 4.620512000  | 2.458008000  | -3.491766000 | 6 | -2.648272000 | 0.447377000  | -0.698365000 |
| 1  | 5.640886000  | 2.826288000  | -3.458153000 | 6 | -3.942849000 | 1.066141000  | -0.761456000 |
| 6  | 3.744662000  | 2.917025000  | -4.473896000 | 6 | -3.959717000 | 2.509231000  | -0.809392000 |
| 1  | 4.082088000  | 3.644557000  | -5.204540000 | 6 | -2.744616000 | 3.177861000  | -0.847976000 |
| 6  | 2.430532000  | 2.450603000  | -4.509624000 | 1 | -2.741827000 | 4.262891000  | -0.844963000 |
| 1  | 1.741787000  | 2.816030000  | -5.264144000 | 6 | -1.530420000 | 2.486987000  | -0.787290000 |
| 6  | 1.997398000  | 1.522766000  | -3.566026000 | 6 | -0.206177000 | 3.184147000  | -0.623119000 |
| 1  | 0.969534000  | 1.165352000  | -3.585809000 | 1 | 0.601601000  | 2.464872000  | -0.813434000 |
| 6  | 2.468604000  | -1.756313000 | -2.580784000 | 1 | -0.103165000 | 3.481628000  | 0.432506000  |
| 6  | 3.697074000  | -2.108423000 | -3.154431000 | 6 | 0.016263000  | 4.431579000  | -1.491149000 |
| 1  | 4.595650000  | -1.553201000 | -2.896644000 | 1 | 0.045639000  | 4.133664000  | -2.545480000 |
| 6  | 3.768012000  | -3.154157000 | -4.068920000 | 1 | -0.816431000 | 5.131656000  | -1.372242000 |
| 1  | 4.723064000  | -3.423686000 | -4.507582000 | 6 | 1.304589000  | 5.123315000  | -1.109382000 |
| 6  | 2.609692000  | -3.840699000 | -4.438808000 | 6 | 2.526984000  | 4.658492000  | -1.601628000 |
| 1  | 2.666491000  | -4.646146000 | -5.163654000 | 1 | 2.539280000  | 3.806739000  | -2.274354000 |
| 6  | 1.382765000  | -3.490747000 | -3.880926000 | 6 | 3.721186000  | 5.281191000  | -1.247958000 |
| 1  | 0.480043000  | -4.020576000 | -4.167342000 | 1 | 4.658353000  | 4.911867000  | -1.654407000 |
| 6  | 1.313833000  | -2.455323000 | -2.948797000 | 6 | 3.710669000  | 6.369895000  | -0.376223000 |
| 1  | 0.354543000  | -2.176635000 | -2.515987000 | 1 | 4.639391000  | 6.858951000  | -0.100017000 |
| 6  | 3.494337000  | -0.442216000 | -0.158007000 | 6 | 2.498302000  | 6.827319000  | 0.137236000  |
| 6  | 4.279642000  | -1.575024000 | 0.073535000  | 1 | 2.480343000  | 7.673095000  | 0.817725000  |
| 1  | 4.244799000  | -2.409812000 | -0.620087000 | 6 | 1.304521000  | 6.208141000  | -0.229692000 |
| 6  | 5.085878000  | -1.662628000 | 1.208532000  | 1 | 0.360874000  | 6.574789000  | 0.167196000  |
| 1  | 5.681259000  | -2.553797000 | 1.372880000  | 6 | -5.066333000 | 0.254851000  | -0.808282000 |
| 6  | 5.109753000  | -0.615874000 | 2.124198000  | 1 | -6.047963000 | 0.688170000  | -0.951298000 |
| 1  | 5.734692000  | -0.677819000 | 3.008830000  | 6 | -4.963288000 | -1.200860000 | -0.706232000 |
| 6  | 4.318843000  | 0.514616000  | 1.928683000  | 1 | -5.881148000 | -1.773465000 | -0.663257000 |
| 1  | 4.318404000  | 1.324418000  | 2.649878000  | 6 | -3.738444000 | -1.840079000 | -0.624930000 |
| 6  | 3.510361000  | 0.588406000  | 0.799648000  | 6 | -2.546661000 | -1.032791000 | -0.566329000 |
| 6  | 2.262005000  | 2.428054000  | 1.625316000  | 6 | -3.547977000 | -3.271934000 | -0.513843000 |
| 6  | 2.838693000  | 3.678594000  | 1.803594000  | 6 | -2.261177000 | -3.741816000 | -0.222366000 |
| 1  | 3.601743000  | 4.008898000  | 1.107458000  | 1 | -2.101881000 | -4.809581000 | -0.110811000 |
| 6  | 2.408993000  | 4.486992000  | 2.851714000  | 6 | -1.183216000 | -2.878908000 | -0.124230000 |
| 1  | 2.849643000  | 5.470054000  | 2.980478000  | 6 | 0.210911000  | -3.289470000 | 0.258383000  |
| 6  | 1.422748000  | 4.035031000  | 3.725823000  | 1 | 0.329175000  | -3.168497000 | 1.346433000  |
| 1  | 1.095003000  | 4.657554000  | 4.551085000  | 1 | 0.913944000  | -2.575829000 | -0.189397000 |
| 6  | 0.845351000  | 2.783731000  | 3.530585000  | 6 | 0.637402000  | -4.705601000 | -0.144423000 |
| 1  | 0.057538000  | 2.446764000  | 4.198387000  | 1 | 0.066659000  | -5.448203000 | 0.424649000  |
| 6  | 1.236951000  | 1.964308000  | 2.465208000  | 1 | 0.412744000  | -4.862305000 | -1.205536000 |
| 6  | 1.033273000  | -0.768152000 | 3.386049000  | 6 | 2.117551000  | -4.896585000 | 0.094846000  |
| 6  | 0.587097000  | -0.691298000 | 4.711785000  | 6 | 3.010220000  | -4.962728000 | -0.976656000 |
| 1  | -0.188154000 | 0.019540000  | 4.984676000  | 1 | 2.630050000  | -4.902524000 | -1.992198000 |
| 6  | 1.123294000  | -1.534225000 | 5.679202000  | 6 | 4.380115000  | -5.107383000 | -0.758984000 |
| 1  | 0.771068000  | -1.472317000 | 6.703575000  | 1 | 5.055316000  | -5.158883000 | -1.608075000 |
| 6  | 2.114678000  | -2.454126000 | 5.334020000  | 6 | 4.876225000  | -5.183555000 | 0.539835000  |
| 1  | 2.535803000  | -3.106045000 | 6.092418000  | 1 | 5.941076000  | -5.302455000 | 0.713955000  |
| 6  | 2.559516000  | -2.536896000 | 4.018067000  | 6 | 3.993507000  | -5.111187000 | 1.618075000  |
| 1  | 3.332430000  | -3.246288000 | 3.739392000  | 1 | 4.373475000  | -5.179931000 | 2.633312000  |
| 6  | 2.013989000  | -1.703135000 | 3.042731000  | 6 | 2.626364000  | -4.967197000 | 1.396643000  |
| 1  | 2.361594000  | -1.779907000 | 2.014135000  | 1 | 1.944279000  | -4.917288000 | 2.242972000  |
| 6  | -1.347936000 | 0.599959000  | 2.513744000  | 6 | -4.654655000 | -4.225736000 | -0.691205000 |
| 6  | -2.007947000 | 1.829309000  | 2.407493000  | 6 | -6.703883000 | -6.110056000 | -1.055786000 |
|    |              |              |              | 6 | -4.774078000 | -5.331384000 | 0.166071000  |

|   |              |              |              |   |              |              |             |
|---|--------------|--------------|--------------|---|--------------|--------------|-------------|
| 6 | -5.579148000 | -4.086248000 | -1.739859000 | 1 | 4.044043000  | 3.345206000  | 1.827089000 |
| 6 | -6.590617000 | -5.022711000 | -1.920727000 | 6 | 2.812494000  | 3.555179000  | 3.595841000 |
| 6 | -5.791812000 | -6.260820000 | -0.012228000 | 1 | 3.364865000  | 4.407157000  | 3.977764000 |
| 1 | -4.077304000 | -5.444337000 | 0.991220000  | 6 | 1.724245000  | 3.046170000  | 4.302802000 |
| 1 | -5.481773000 | -3.255690000 | -2.432367000 | 1 | 1.425129000  | 3.495522000  | 5.243427000 |
| 1 | -7.288063000 | -4.906777000 | -2.743687000 | 6 | 1.016860000  | 1.959506000  | 3.799238000 |
| 1 | -5.876706000 | -7.101974000 | 0.667752000  | 1 | 0.160262000  | 1.575959000  | 4.346079000 |
| 1 | -7.497167000 | -6.836747000 | -1.195416000 | 6 | 1.373743000  | 1.365638000  | 2.581972000 |
| 6 | -5.216482000 | 3.281804000  | -0.754222000 | 6 | 0.938780000  | -1.483404000 | 2.862706000 |
| 6 | -7.546635000 | 4.829592000  | -0.585271000 | 6 | 0.487185000  | -1.668173000 | 4.176000000 |
| 6 | -6.205623000 | 2.981084000  | 0.194244000  | 1 | -0.202065000 | -0.954415000 | 4.619468000 |
| 6 | -5.409263000 | 4.375008000  | -1.610176000 | 6 | 0.902560000  | -2.775811000 | 4.907350000 |
| 6 | -6.568804000 | 5.138469000  | -1.529465000 | 1 | 0.546155000  | -2.915847000 | 5.922661000 |
| 6 | -7.359421000 | 3.752605000  | 0.279437000  | 6 | 1.772714000  | -3.706944000 | 4.336759000 |
| 1 | -6.051189000 | 2.153677000  | 0.880731000  | 1 | 2.091027000  | -4.571612000 | 4.910264000 |
| 1 | -4.652704000 | 4.610267000  | -2.352965000 | 6 | 2.226635000  | -3.530147000 | 3.033229000 |
| 1 | -6.710814000 | 5.973988000  | -2.206787000 | 1 | 2.896930000  | -4.253260000 | 2.575998000 |
| 1 | -8.110704000 | 3.515645000  | 1.025358000  | 6 | 1.807436000  | -2.422059000 | 2.298478000 |
| 1 | -8.449735000 | 5.427352000  | -0.521982000 | 1 | 2.166931000  | -2.289591000 | 1.279932000 |

#### B4-1 (T<sub>2</sub>)

|    |              |              |              |   |              |              |              |
|----|--------------|--------------|--------------|---|--------------|--------------|--------------|
| 29 | 0.279104000  | -0.084083000 | -0.641767000 | 6 | -1.815635000 | 1.569244000  | 2.360418000  |
| 15 | 2.383413000  | -0.220050000 | -1.715356000 | 1 | -1.153678000 | 2.428349000  | 2.289535000  |
| 15 | 0.451090000  | -0.040318000 | 1.841336000  | 6 | -3.188391000 | 1.770560000  | 2.486015000  |
| 8  | 2.873854000  | 1.335846000  | 0.687090000  | 1 | -3.578373000 | 2.783629000  | 2.525745000  |
| 7  | -1.281552000 | 1.376084000  | -0.844880000 | 6 | -4.056120000 | 0.681580000  | 2.540719000  |
| 7  | -1.489917000 | -1.311794000 | -0.794078000 | 1 | -5.126971000 | 0.838740000  | 2.626293000  |
| 6  | 3.039588000  | 1.278556000  | -2.530785000 | 6 | -3.543499000 | -0.613466000 | 2.483491000  |
| 6  | 4.378098000  | 1.671917000  | -2.440738000 | 1 | -4.213082000 | -1.467782000 | 2.517005000  |
| 1  | 5.074790000  | 1.097876000  | -1.835500000 | 6 | -2.170877000 | -0.818078000 | 2.371809000  |
| 6  | 4.817306000  | 2.803133000  | -3.125956000 | 1 | -1.781586000 | -1.832624000 | 2.317701000  |
| 1  | 5.858143000  | 3.103446000  | -3.058202000 | 6 | -2.518237000 | 0.848583000  | -0.892967000 |
| 6  | 3.923765000  | 3.549864000  | -3.892345000 | 6 | -3.696185000 | 1.631063000  | -0.859997000 |
| 1  | 4.268441000  | 4.434695000  | -4.417044000 | 6 | -3.541372000 | 3.047929000  | -0.719127000 |
| 6  | 2.586741000  | 3.165019000  | -3.979016000 | 6 | -2.269902000 | 3.559746000  | -0.631554000 |
| 1  | 1.887547000  | 3.749174000  | -4.567826000 | 1 | -2.135286000 | 4.628914000  | -0.510380000 |
| 6  | 2.144404000  | 2.034282000  | -3.297365000 | 6 | -1.130263000 | 2.708500000  | -0.680665000 |
| 1  | 1.097578000  | 1.741092000  | -3.349229000 | 6 | 0.202108000  | 3.198912000  | -0.510310000 |
| 6  | 2.610952000  | -1.516137000 | -2.985113000 | 1 | 1.003148000  | 2.497482000  | -0.740146000 |
| 6  | 3.820045000  | -1.690695000 | -3.671691000 | 6 | 0.525669000  | 4.453850000  | 0.016774000  |
| 1  | 4.663443000  | -1.037634000 | -3.460957000 | 1 | -0.270462000 | 5.065557000  | 0.433981000  |
| 6  | 3.944099000  | -2.698456000 | -4.621215000 | 6 | 1.848503000  | 4.980914000  | 0.130773000  |
| 1  | 4.883397000  | -2.831875000 | -5.147390000 | 6 | 2.960880000  | 4.416923000  | -0.545811000 |
| 6  | 2.860739000  | -3.533949000 | -4.900121000 | 1 | 2.819868000  | 3.567852000  | -1.205790000 |
| 1  | 2.961401000  | -4.319786000 | -5.641439000 | 6 | 4.227493000  | 4.951975000  | -0.380642000 |
| 6  | 1.650312000  | -3.353469000 | -4.238280000 | 1 | 5.064771000  | 4.511599000  | -0.912530000 |
| 1  | 0.802955000  | -3.992566000 | -4.462830000 | 6 | 4.433380000  | 6.045603000  | 0.467385000  |
| 6  | 1.523335000  | -2.341991000 | -3.286288000 | 1 | 5.430181000  | 6.452719000  | 0.598992000  |
| 1  | 0.571794000  | -2.186466000 | -2.782721000 | 6 | 3.345691000  | 6.621209000  | 1.136531000  |
| 6  | 3.599752000  | -0.632636000 | -0.410232000 | 1 | 3.500182000  | 7.474033000  | 1.789210000  |
| 6  | 4.363877000  | -1.803430000 | -0.404803000 | 6 | 2.073393000  | 6.108183000  | 0.961506000  |
| 1  | 4.351967000  | -2.451570000 | -1.275781000 | 1 | 1.229043000  | 6.553662000  | 1.479942000  |
| 6  | 5.126489000  | -2.159399000 | 0.706176000  | 6 | -4.968541000 | 0.984608000  | -0.944291000 |
| 1  | 5.707310000  | -3.074966000 | 0.694185000  | 1 | -5.864277000 | 1.592578000  | -0.983588000 |
| 6  | 5.134471000  | -1.337660000 | 1.827871000  | 6 | -5.072590000 | -0.373798000 | -0.950848000 |
| 1  | 5.719932000  | -1.608669000 | 2.699884000  | 1 | -6.051154000 | -0.838118000 | -0.971444000 |
| 6  | 4.390704000  | -0.160618000 | 1.847475000  | 6 | -3.911872000 | -1.205186000 | -0.892118000 |
| 1  | 4.394014000  | 0.478884000  | 2.722639000  | 6 | -2.629701000 | -0.605578000 | -0.889623000 |
| 6  | 3.629332000  | 0.183805000  | 0.734631000  | 6 | -3.974019000 | -2.631661000 | -0.765132000 |
| 6  | 2.480319000  | 1.887963000  | 1.900305000  | 6 | -2.801835000 | -3.320693000 | -0.571859000 |
| 6  | 3.199905000  | 2.970059000  | 2.395085000  | 1 | -2.828351000 | -4.399271000 | -0.461437000 |
|    |              |              |              | 6 | -1.549054000 | -2.645471000 | -0.580086000 |
|    |              |              |              | 6 | -0.306021000 | -3.311869000 | -0.363615000 |

|   |              |              |              |   |              |              |              |
|---|--------------|--------------|--------------|---|--------------|--------------|--------------|
| 1 | 0.576484000  | -2.698810000 | -0.530798000 | 1 | 1.451826000  | -4.858534000 | -5.335277000 |
| 6 | -0.135197000 | -4.611917000 | 0.112951000  | 6 | 0.361087000  | -3.596069000 | -3.977171000 |
| 1 | -1.003381000 | -5.176240000 | 0.443441000  | 1 | -0.604112000 | -4.030872000 | -4.215993000 |
| 6 | 1.138803000  | -5.239526000 | 0.282584000  | 6 | 0.446287000  | -2.570135000 | -3.035902000 |
| 6 | 1.233859000  | -6.415830000 | 1.066838000  | 1 | -0.455350000 | -2.203998000 | -2.547977000 |
| 1 | 0.328830000  | -6.828856000 | 1.502719000  | 6 | 2.960224000  | -0.854534000 | -0.340975000 |
| 6 | 2.456668000  | -7.019484000 | 1.301354000  | 6 | 3.632750000  | -2.068458000 | -0.179871000 |
| 1 | 2.509875000  | -7.911322000 | 1.916667000  | 1 | 3.475325000  | -2.873218000 | -0.890846000 |
| 6 | 3.623899000  | -6.483560000 | 0.744207000  | 6 | 4.481319000  | -2.277342000 | 0.908387000  |
| 1 | 4.581657000  | -6.960156000 | 0.922552000  | 1 | 4.994266000  | -3.229442000 | 1.008451000  |
| 6 | 3.547780000  | -5.339506000 | -0.058367000 | 6 | 4.658153000  | -1.266280000 | 1.847516000  |
| 1 | 4.448143000  | -4.941421000 | -0.515780000 | 1 | 5.315410000  | -1.419057000 | 2.697238000  |
| 6 | 2.330219000  | -4.721942000 | -0.288965000 | 6 | 3.983425000  | -0.052720000 | 1.721720000  |
| 1 | 2.286923000  | -3.852876000 | -0.939772000 | 1 | 4.104895000  | 0.730080000  | 2.462260000  |
| 6 | -5.259722000 | -3.372761000 | -0.812520000 | 6 | 3.134543000  | 0.141068000  | 0.637447000  |
| 6 | -7.637708000 | -4.843784000 | -0.922601000 | 6 | 2.141212000  | 2.090005000  | 1.556954000  |
| 6 | -5.587753000 | -4.266782000 | 0.212074000  | 6 | 2.888028000  | 3.245871000  | 1.741566000  |
| 6 | -6.133141000 | -3.227452000 | -1.897299000 | 1 | 3.666711000  | 3.487267000  | 1.026486000  |
| 6 | -7.314028000 | -3.960962000 | -1.951580000 | 6 | 2.603098000  | 4.079873000  | 2.818138000  |
| 6 | -6.772770000 | -4.995396000 | 0.158641000  | 1 | 3.176241000  | 4.992158000  | 2.949572000  |
| 1 | -4.915277000 | -4.378095000 | 1.057874000  | 6 | 1.589153000  | 3.744947000  | 3.713302000  |
| 1 | -5.875189000 | -2.550318000 | -2.706600000 | 1 | 1.371220000  | 4.387469000  | 4.559365000  |
| 1 | -7.979488000 | -3.846536000 | -2.800746000 | 6 | 0.844085000  | 2.585938000  | 3.514718000  |
| 1 | -7.020689000 | -5.679745000 | 0.963178000  | 1 | 0.039419000  | 2.341625000  | 4.202576000  |
| 1 | -8.560578000 | -5.412599000 | -0.964870000 | 6 | 1.092133000  | 1.744631000  | 2.423375000  |
| 6 | -4.701344000 | 3.970599000  | -0.625134000 | 6 | 0.614775000  | -0.958439000 | 3.309486000  |
| 6 | -6.819637000 | 5.785650000  | -0.394351000 | 6 | 0.236147000  | -0.853222000 | 4.654259000  |
| 6 | -5.705177000 | 3.771354000  | 0.331030000  | 1 | -0.445443000 | -0.066883000 | 4.967091000  |
| 6 | -4.766964000 | 5.093011000  | -1.457480000 | 6 | 0.718934000  | -1.761985000 | 5.589497000  |
| 6 | -5.822998000 | 5.992705000  | -1.345390000 | 1 | 0.419130000  | -1.677186000 | 6.628842000  |
| 6 | -6.756617000 | 4.675430000  | 0.445899000  | 6 | 1.591319000  | -2.776654000 | 5.192648000  |
| 1 | -5.649778000 | 2.911800000  | 0.993698000  | 1 | 1.972897000  | -3.479767000 | 5.925885000  |
| 1 | -3.992560000 | 5.249494000  | -2.202686000 | 6 | 1.967822000  | -2.888214000 | 3.857679000  |
| 1 | -5.867784000 | 6.854632000  | -2.002780000 | 1 | 2.647941000  | -3.670907000 | 3.537196000  |
| 1 | -7.524593000 | 4.514696000  | 1.195183000  | 6 | 1.473084000  | -1.988528000 | 2.914238000  |
| 1 | -7.642041000 | 6.487738000  | -0.306307000 | 1 | 1.765979000  | -2.089662000 | 1.870604000  |

**B4-2 (Ti)**

|    |              |              |              |   |              |              |              |
|----|--------------|--------------|--------------|---|--------------|--------------|--------------|
| 29 | -0.267425000 | -0.129923000 | -0.362473000 | 6 | -3.519976000 | 2.204650000  | 2.635759000  |
| 15 | 1.687693000  | -0.539910000 | -1.613309000 | 1 | -3.908409000 | 3.216878000  | 2.569130000  |
| 15 | 0.079165000  | 0.260291000  | 2.049555000  | 6 | -4.384393000 | 1.136078000  | 2.861978000  |
| 8  | 2.425752000  | 1.307989000  | 0.446874000  | 1 | -5.449356000 | 1.309169000  | 2.983058000  |
| 7  | -1.877984000 | 1.268676000  | -0.680187000 | 6 | -3.875591000 | -0.159910000 | 2.935682000  |
| 7  | -2.008050000 | -1.398524000 | -0.321769000 | 1 | -4.541246000 | -0.999752000 | 3.107829000  |
| 6  | 2.395452000  | 0.745235000  | -2.709758000 | 6 | -2.510532000 | -0.383114000 | 2.782884000  |
| 6  | 3.755004000  | 1.064598000  | -2.734498000 | 1 | -2.126287000 | -1.399951000 | 2.829844000  |
| 1  | 4.436724000  | 0.596843000  | -2.029082000 | 6 | -3.078900000 | 0.720156000  | -0.613041000 |
| 6  | 4.238596000  | 1.977365000  | -3.671161000 | 6 | -4.295677000 | 1.483723000  | -0.629273000 |
| 1  | 5.296012000  | 2.221459000  | -3.688287000 | 6 | -4.147891000 | 2.919023000  | -0.677041000 |
| 6  | 3.370479000  | 2.569281000  | -4.587029000 | 6 | -2.865604000 | 3.444291000  | -0.751921000 |
| 1  | 3.751354000  | 3.275796000  | -5.316955000 | 1 | -2.738909000 | 4.521755000  | -0.750727000 |
| 6  | 2.009900000  | 2.263780000  | -4.556137000 | 6 | -1.737367000 | 2.619404000  | -0.730142000 |
| 1  | 1.328785000  | 2.733986000  | -5.257768000 | 6 | -0.337368000 | 3.155929000  | -0.601791000 |
| 6  | 1.521693000  | 1.363241000  | -3.612851000 | 1 | 0.375311000  | 2.357295000  | -0.848474000 |
| 1  | 0.458439000  | 1.132577000  | -3.579309000 | 1 | -0.160684000 | 3.398899000  | 0.457979000  |
| 6  | 1.682938000  | -1.993670000 | -2.727323000 | 6 | 0.000970000  | 4.403258000  | -1.431618000 |
| 6  | 2.837032000  | -2.458062000 | -3.371237000 | 1 | -0.039322000 | 4.144890000  | -2.496509000 |
| 1  | 3.799190000  | -1.998243000 | -3.158793000 | 1 | -0.743150000 | 5.187718000  | -1.260041000 |
| 6  | 2.753935000  | -3.494735000 | -4.294846000 | 6 | 1.368201000  | 4.930992000  | -1.068556000 |
| 1  | 3.652184000  | -3.851931000 | -4.787615000 | 6 | 2.525733000  | 4.355317000  | -1.594492000 |
| 6  | 1.514821000  | -4.059505000 | -4.603854000 | 1 | 2.438077000  | 3.534296000  | -2.299573000 |

|   |              |              |              |                          |              |              |              |
|---|--------------|--------------|--------------|--------------------------|--------------|--------------|--------------|
| 6 | 3.792671000  | 4.809823000  | -1.252018000 | 1                        | 7.086851000  | -6.197771000 | -0.297304000 |
| 1 | 4.652751000  | 4.333469000  | -1.707975000 | 1                        | 6.020016000  | -5.286784000 | -1.366232000 |
| 6 | 3.957584000  | 5.859106000  | -0.323330000 | 7                        | 5.217991000  | 6.280825000  | 0.072488000  |
| 6 | 2.788166000  | 6.445676000  | 0.202256000  | 6                        | 6.362446000  | 5.859902000  | -0.713220000 |
| 1 | 2.854639000  | 7.271748000  | 0.899500000  | 1                        | 6.284431000  | 6.158101000  | -1.768946000 |
| 6 | 1.530114000  | 5.981701000  | -0.165597000 | 1                        | 6.481581000  | 4.772725000  | -0.675005000 |
| 1 | 0.651291000  | 6.460184000  | 0.261511000  | 1                        | 7.263883000  | 6.304935000  | -0.292710000 |
| 6 | -5.505884000 | 0.807387000  | -0.639035000 | 6                        | 5.327987000  | 7.524043000  | 0.811148000  |
| 1 | -6.435473000 | 1.352567000  | -0.741887000 | 1                        | 4.914767000  | 8.382755000  | 0.261987000  |
| 6 | -5.566942000 | -0.651883000 | -0.555439000 | 1                        | 6.379221000  | 7.719865000  | 1.021317000  |
| 1 | -6.542308000 | -1.117168000 | -0.488834000 | 1                        | 4.806632000  | 7.452009000  | 1.770947000  |
| 6 | -4.421356000 | -1.427826000 | -0.526019000 |                          |              |              |              |
| 6 | -3.143428000 | -0.763368000 | -0.497389000 |                          |              |              |              |
| 6 | -4.392624000 | -2.874187000 | -0.446473000 |                          |              |              |              |
| 6 | -3.160945000 | -3.492583000 | -0.202640000 |                          |              |              |              |
| 1 | -3.120639000 | -4.573563000 | -0.114555000 |                          |              |              |              |
| 6 | -1.987857000 | -2.759798000 | -0.125194000 |                          |              |              |              |
| 6 | -0.640047000 | -3.335853000 | 0.203609000  |                          |              |              |              |
| 1 | -0.480529000 | -3.264650000 | 1.290985000  |                          |              |              |              |
| 1 | 0.126953000  | -2.689678000 | -0.242015000 |                          |              |              |              |
| 6 | -0.377833000 | -4.777340000 | -0.250682000 |                          |              |              |              |
| 1 | -1.016350000 | -5.470508000 | 0.309362000  |                          |              |              |              |
| 1 | -0.641938000 | -4.874925000 | -1.310204000 |                          |              |              |              |
| 6 | 1.078448000  | -5.125924000 | -0.055298000 |                          |              |              |              |
| 6 | 1.950806000  | -5.247119000 | -1.136868000 |                          |              |              |              |
| 1 | 1.565345000  | -5.144451000 | -2.147656000 |                          |              |              |              |
| 6 | 3.308760000  | -5.494600000 | -0.963756000 |                          |              |              |              |
| 1 | 3.935668000  | -5.579980000 | -1.843505000 |                          |              |              |              |
| 6 | 3.861348000  | -5.610473000 | 0.326741000  |                          |              |              |              |
| 6 | 2.973022000  | -5.528102000 | 1.419973000  |                          |              |              |              |
| 1 | 3.337181000  | -5.664712000 | 2.431200000  |                          |              |              |              |
| 6 | 1.620048000  | -5.282789000 | 1.223330000  |                          |              |              |              |
| 1 | 0.970498000  | -5.214387000 | 2.094224000  |                          |              |              |              |
| 6 | -5.604921000 | -3.691265000 | -0.617784000 |                          |              |              |              |
| 6 | -7.863031000 | -5.318352000 | -0.987466000 |                          |              |              |              |
| 6 | -5.832754000 | -4.801448000 | 0.211098000  |                          |              |              |              |
| 6 | -6.527925000 | -3.416335000 | -1.640556000 |                          |              |              |              |
| 6 | -7.643158000 | -4.225403000 | -1.824424000 |                          |              |              |              |
| 6 | -6.953719000 | -5.603184000 | 0.030255000  |                          |              |              |              |
| 1 | -5.136578000 | -5.018249000 | 1.015840000  |                          |              |              |              |
| 1 | -6.349897000 | -2.581563000 | -2.311520000 |                          |              |              |              |
| 1 | -8.338649000 | -4.006300000 | -2.627796000 |                          |              |              |              |
| 1 | -7.120788000 | -6.449547000 | 0.688246000  |                          |              |              |              |
| 1 | -8.736629000 | -5.945815000 | -1.128824000 |                          |              |              |              |
| 6 | -5.305730000 | 3.831407000  | -0.595594000 |                          |              |              |              |
| 6 | -7.436874000 | 5.639856000  | -0.392321000 |                          |              |              |              |
| 6 | -6.296659000 | 3.658635000  | 0.382352000  |                          |              |              |              |
| 6 | -5.394759000 | 4.928533000  | -1.463395000 |                          |              |              |              |
| 6 | -6.455923000 | 5.821825000  | -1.365723000 |                          |              |              |              |
| 6 | -7.351384000 | 4.559487000  | 0.484194000  |                          |              |              |              |
| 1 | -6.220253000 | 2.827647000  | 1.077767000  |                          |              |              |              |
| 1 | -4.636665000 | 5.064962000  | -2.228977000 |                          |              |              |              |
| 1 | -6.518959000 | 6.659455000  | -2.052334000 |                          |              |              |              |
| 1 | -8.104518000 | 4.420523000  | 1.252663000  |                          |              |              |              |
| 1 | -8.263344000 | 6.338407000  | -0.315430000 |                          |              |              |              |
| 7 | 5.224582000  | -5.768909000 | 0.519540000  |                          |              |              |              |
| 6 | 5.701845000  | -6.141991000 | 1.837430000  |                          |              |              |              |
| 1 | 5.275958000  | -7.092331000 | 2.189764000  |                          |              |              |              |
| 1 | 5.457550000  | -5.366471000 | 2.571349000  |                          |              |              |              |
| 1 | 6.786779000  | -6.237717000 | 1.807280000  |                          |              |              |              |
| 6 | 6.053375000  | -6.092487000 | -0.625976000 |                          |              |              |              |
| 1 | 5.746341000  | -7.025056000 | -1.120526000 |                          |              |              |              |
|   |              |              |              | <b>1 (S<sub>0</sub>)</b> |              |              |              |
|   |              |              |              | 29                       | -0.102964000 | -0.114107000 | -0.473421000 |
|   |              |              |              | 15                       | 0.171345000  | -1.166638000 | 1.678843000  |
|   |              |              |              | 15                       | -0.138699000 | 2.227613000  | -0.552094000 |
|   |              |              |              | 8                        | 1.330818000  | 1.635169000  | 1.824577000  |
|   |              |              |              | 7                        | 1.177547000  | -1.257841000 | -1.762005000 |
|   |              |              |              | 7                        | -1.560139000 | -1.340926000 | -1.499678000 |
|   |              |              |              | 6                        | 2.509766000  | -1.211545000 | -1.845206000 |
|   |              |              |              | 6                        | 3.200091000  | -2.068543000 | -2.726547000 |
|   |              |              |              | 6                        | 2.505027000  | -2.962868000 | -3.505035000 |
|   |              |              |              | 6                        | 1.104291000  | -3.029760000 | -3.413982000 |
|   |              |              |              | 6                        | 0.330185000  | -3.957300000 | -4.178122000 |
|   |              |              |              | 6                        | -1.018620000 | -4.013144000 | -4.034249000 |
|   |              |              |              | 6                        | -1.687725000 | -3.141071000 | -3.120026000 |
|   |              |              |              | 6                        | -3.078095000 | -3.187775000 | -2.916445000 |
|   |              |              |              | 6                        | -3.666489000 | -2.335118000 | -2.014043000 |
|   |              |              |              | 6                        | -2.881484000 | -1.398990000 | -1.309392000 |
|   |              |              |              | 6                        | -0.960183000 | -2.192678000 | -2.364682000 |
|   |              |              |              | 6                        | 0.478098000  | -2.140394000 | -2.510305000 |
|   |              |              |              | 6                        | 3.167182000  | -0.200612000 | -0.938055000 |
|   |              |              |              | 6                        | -3.430757000 | -0.447285000 | -0.277168000 |
|   |              |              |              | 6                        | 1.522902000  | -0.567031000 | 2.777209000  |
|   |              |              |              | 6                        | 1.917409000  | 0.777113000  | 2.733213000  |
|   |              |              |              | 6                        | 2.938130000  | 1.265038000  | 3.544593000  |
|   |              |              |              | 6                        | 3.569008000  | 0.410857000  | 4.442205000  |
|   |              |              |              | 6                        | 3.174700000  | -0.923163000 | 4.527791000  |
|   |              |              |              | 6                        | 2.162421000  | -1.402110000 | 3.704066000  |
|   |              |              |              | 6                        | 0.644394000  | -2.885930000 | 1.257124000  |
|   |              |              |              | 6                        | -0.367890000 | -3.784254000 | 0.888491000  |
|   |              |              |              | 6                        | -0.049955000 | -5.052448000 | 0.412670000  |
|   |              |              |              | 6                        | 1.282395000  | -5.440083000 | 0.283303000  |
|   |              |              |              | 6                        | 2.294223000  | -4.550396000 | 0.633247000  |
|   |              |              |              | 6                        | 1.979571000  | -3.281205000 | 1.114007000  |
|   |              |              |              | 6                        | -1.196099000 | -1.362297000 | 2.894276000  |
|   |              |              |              | 6                        | -2.095933000 | -0.301974000 | 3.052341000  |
|   |              |              |              | 6                        | -3.098048000 | -0.365202000 | 4.018586000  |
|   |              |              |              | 6                        | -3.219536000 | -1.493021000 | 4.825907000  |
|   |              |              |              | 6                        | -2.329513000 | -2.554662000 | 4.671839000  |
|   |              |              |              | 6                        | -1.318920000 | -2.488922000 | 3.717196000  |
|   |              |              |              | 6                        | -0.588270000 | 2.793494000  | 1.127769000  |
|   |              |              |              | 6                        | 0.210144000  | 2.338802000  | 2.191232000  |
|   |              |              |              | 6                        | -0.120218000 | 2.612947000  | 3.514610000  |
|   |              |              |              | 6                        | -1.273097000 | 3.344514000  | 3.788800000  |
|   |              |              |              | 6                        | -2.086307000 | 3.797164000  | 2.754284000  |
|   |              |              |              | 6                        | -1.741558000 | 3.522078000  | 1.432817000  |
|   |              |              |              | 6                        | 1.367280000  | 3.190728000  | -0.984617000 |
|   |              |              |              | 6                        | 1.963056000  | 4.113113000  | -0.121271000 |
|   |              |              |              | 6                        | 3.077816000  | 4.841977000  | -0.533857000 |
|   |              |              |              | 6                        | 3.601556000  | 4.662314000  | -1.811125000 |
|   |              |              |              | 6                        | 3.008088000  | 3.746842000  | -2.679792000 |

|   |              |              |              |                          |              |              |              |
|---|--------------|--------------|--------------|--------------------------|--------------|--------------|--------------|
| 6 | 1.901613000  | 3.010960000  | -2.267553000 | 1                        | -4.418148000 | 2.010705000  | 0.340343000  |
| 6 | -1.345558000 | 3.016098000  | -1.683342000 | 6                        | -5.424227000 | 0.423388000  | -1.624368000 |
| 6 | -1.498780000 | 4.408519000  | -1.752615000 | 1                        | -5.427041000 | -0.379697000 | -2.366589000 |
| 6 | -2.369102000 | 4.972844000  | -2.678313000 | 1                        | -4.804418000 | 1.237394000  | -2.014457000 |
| 6 | -3.079381000 | 4.156504000  | -3.559337000 | 1                        | -6.450943000 | 0.796068000  | -1.540972000 |
| 6 | -2.916956000 | 2.775345000  | -3.512190000 | 6                        | 5.429111000  | -1.247409000 | -0.381264000 |
| 6 | -2.054983000 | 2.206119000  | -2.574744000 | 1                        | 5.058690000  | -1.537839000 | 0.608663000  |
| 1 | 4.277687000  | -2.028995000 | -2.791693000 | 1                        | 6.500467000  | -1.040448000 | -0.284612000 |
| 1 | 3.030591000  | -3.626392000 | -4.186243000 | 1                        | 5.322336000  | -2.112886000 | -1.040358000 |
| 1 | 0.846438000  | -4.619981000 | -4.866333000 |                          |              |              |              |
| 1 | -1.612531000 | -4.721883000 | -4.603761000 |                          |              |              |              |
| 1 | -3.677490000 | -3.905211000 | -3.469918000 | <b>2 (S<sub>0</sub>)</b> |              |              |              |
| 1 | -4.733342000 | -2.382351000 | -1.847619000 | 29                       | -0.155769000 | 0.153669000  | -0.147756000 |
| 1 | -2.816422000 | 0.459787000  | -0.348879000 | 15                       | 0.194248000  | -1.429435000 | -1.825330000 |
| 1 | -3.185570000 | -0.875415000 | 0.705276000  | 15                       | 0.414165000  | -0.435423000 | 2.102890000  |
| 1 | 3.222948000  | 2.308956000  | 3.460561000  | 8                        | 2.125627000  | -2.070716000 | 0.190294000  |
| 1 | 4.364375000  | 0.789198000  | 5.076776000  | 7                        | 0.561256000  | 2.153651000  | -0.362692000 |
| 1 | 3.657038000  | -1.591843000 | 5.233749000  | 7                        | -1.986030000 | 1.273090000  | -0.062748000 |
| 1 | 1.869148000  | -2.445470000 | 3.772506000  | 6                        | 1.662715000  | -1.305910000 | -2.921325000 |
| 1 | -1.411834000 | -3.496395000 | 0.979652000  | 6                        | 2.481923000  | -2.398277000 | -2.219983000 |
| 1 | -0.847187000 | -5.738739000 | 0.142265000  | 1                        | 2.312109000  | -3.355504000 | -2.734987000 |
| 1 | 1.529420000  | -6.430234000 | -0.087975000 | 6                        | 3.511182000  | -2.267697000 | -4.150948000 |
| 1 | 3.336037000  | -4.841864000 | 0.536068000  | 1                        | 4.139165000  | -3.123503000 | -4.381159000 |
| 1 | 2.783553000  | -2.603360000 | 1.383757000  | 6                        | 3.728763000  | -1.048927000 | -4.790451000 |
| 1 | -2.011367000 | 0.579539000  | 2.422389000  | 1                        | 4.526774000  | -0.952240000 | -5.520589000 |
| 1 | -3.783213000 | 0.469182000  | 4.137658000  | 6                        | 2.923220000  | 0.048430000  | -4.485954000 |
| 1 | -4.004806000 | -1.545475000 | 5.574287000  | 1                        | 3.091928000  | 1.002565000  | -4.976646000 |
| 1 | -2.418745000 | -3.436427000 | 5.299664000  | 6                        | 1.898854000  | -0.077320000 | -3.551504000 |
| 1 | -0.631292000 | -3.322269000 | 3.608115000  | 1                        | 1.271765000  | 0.780569000  | -3.318230000 |
| 1 | 0.510711000  | 2.253526000  | 4.320191000  | 6                        | -1.127117000 | -1.638748000 | -3.080543000 |
| 1 | -1.532989000 | 3.556244000  | 4.821538000  | 6                        | -1.073214000 | -2.630967000 | -4.069678000 |
| 1 | -2.986547000 | 4.363289000  | 2.970807000  | 1                        | -0.240762000 | -3.328916000 | -4.097389000 |
| 1 | -2.381231000 | 3.870073000  | 0.628220000  | 6                        | -2.077693000 | -2.722441000 | -5.027346000 |
| 1 | 2.820530000  | -0.432671000 | 0.079025000  | 1                        | -2.030820000 | -3.499243000 | -5.784770000 |
| 1 | 2.705331000  | 0.766891000  | -1.172827000 | 6                        | -3.134533000 | -1.811201000 | -5.024195000 |
| 1 | 1.554847000  | 4.275274000  | 0.871533000  | 1                        | -3.913161000 | -1.880963000 | -5.778017000 |
| 1 | 3.531853000  | 5.557335000  | 0.145789000  | 6                        | -3.180444000 | -0.803904000 | -4.064293000 |
| 1 | 4.466806000  | 5.235087000  | -2.131399000 | 1                        | -3.990671000 | -0.080471000 | -4.068830000 |
| 1 | 3.406733000  | 3.605196000  | -3.680196000 | 6                        | -2.180856000 | -0.719703000 | -3.095122000 |
| 1 | 1.444723000  | 2.299896000  | -2.952539000 | 1                        | -2.207923000 | 0.071894000  | -2.351411000 |
| 1 | -0.926153000 | 5.051798000  | -1.089697000 | 6                        | 0.351090000  | -3.053619000 | -1.001113000 |
| 1 | -2.485467000 | 6.051717000  | -2.721478000 | 6                        | -0.511316000 | -4.133176000 | -1.213943000 |
| 1 | -3.751047000 | 4.600571000  | -4.288139000 | 1                        | -1.273677000 | -4.063032000 | -1.981629000 |
| 1 | -3.456909000 | 2.137430000  | -4.205814000 | 6                        | -0.422213000 | -5.289375000 | -0.442496000 |
| 1 | -1.918512000 | 1.128004000  | -2.542342000 | 1                        | -1.107169000 | -6.112212000 | -0.623035000 |
| 6 | 4.696240000  | 0.002541000  | -0.885150000 | 6                        | 0.541282000  | -5.376084000 | 0.557270000  |
| 6 | 5.265936000  | 0.478310000  | -2.228396000 | 1                        | 0.621162000  | -6.272777000 | 1.164273000  |
| 1 | 6.330172000  | 0.713504000  | -2.118320000 | 6                        | 1.410355000  | -4.314461000 | 0.796445000  |
| 1 | 4.755455000  | 1.389395000  | -2.558463000 | 1                        | 2.155254000  | -4.379133000 | 1.581818000  |
| 1 | 5.178795000  | -0.259421000 | -3.029794000 | 6                        | 1.308085000  | -3.162569000 | 0.022612000  |
| 6 | 4.938673000  | 1.124640000  | 0.136137000  | 6                        | 2.733271000  | -1.884398000 | 1.417443000  |
| 1 | 6.011012000  | 1.328061000  | 0.229232000  | 6                        | 4.007819000  | -2.407310000 | 1.609999000  |
| 1 | 4.561911000  | 0.848012000  | 1.126938000  | 1                        | 4.479122000  | -2.952216000 | 0.798701000  |
| 1 | 4.443008000  | 2.052988000  | -0.168758000 | 6                        | 4.650053000  | -2.223272000 | 2.829314000  |
| 6 | -4.921275000 | -0.032185000 | -0.250507000 | 1                        | 5.647858000  | -2.625124000 | 2.976795000  |
| 6 | -5.817418000 | -1.139483000 | 0.322042000  | 6                        | 4.009819000  | -1.528893000 | 3.853800000  |
| 1 | -5.471481000 | -1.439082000 | 1.317761000  | 1                        | 4.499082000  | -1.395213000 | 4.813446000  |
| 1 | -5.855837000 | -2.038934000 | -0.297845000 | 6                        | 2.741221000  | -0.998843000 | 3.645757000  |
| 1 | -6.845035000 | -0.773579000 | 0.421559000  | 1                        | 2.255962000  | -0.451217000 | 4.448114000  |
| 6 | -5.011392000 | 1.165746000  | 0.706732000  | 6                        | 2.083479000  | -1.145388000 | 2.416273000  |
| 1 | -4.646476000 | 0.902389000  | 1.705397000  | 6                        | -0.647130000 | -1.517353000 | 3.142566000  |
| 1 | -6.049916000 | 1.499048000  | 0.805723000  | 6                        | -0.785334000 | -1.331300000 | 4.524047000  |
|   |              |              |              | 1                        | -0.311179000 | -0.484323000 | 5.011162000  |

|   |              |              |              |   |              |              |              |
|---|--------------|--------------|--------------|---|--------------|--------------|--------------|
| 6 | -1.541464000 | -2.222136000 | 5.279650000  | 1 | -2.515621000 | -1.158722000 | -0.175030000 |
| 1 | -1.645419000 | -2.066090000 | 6.349483000  | 6 | -4.681154000 | -1.267653000 | -0.246929000 |
| 6 | -2.158925000 | -3.312110000 | 4.667893000  | 1 | -5.534732000 | -0.902114000 | 0.333552000  |
| 1 | -2.745298000 | -4.007957000 | 5.260845000  | 1 | -4.824372000 | -0.935358000 | -1.280691000 |
| 6 | -2.023769000 | -3.505237000 | 3.295795000  | 6 | -4.660753000 | -2.771752000 | -0.198267000 |
| 1 | -2.503339000 | -4.350081000 | 2.811012000  | 6 | -4.256807000 | -3.513776000 | -1.314982000 |
| 6 | -1.276724000 | -2.608998000 | 2.534215000  | 1 | -4.002511000 | -3.000053000 | -2.238350000 |
| 1 | -1.179180000 | -2.765398000 | 1.463193000  | 6 | -4.173141000 | -4.898204000 | -1.259805000 |
| 6 | 0.406406000  | 1.170076000  | 2.989324000  | 1 | -3.856266000 | -5.482528000 | -2.115605000 |
| 6 | 1.558017000  | 1.937832000  | 3.195980000  | 6 | -4.508561000 | -5.538474000 | -0.072025000 |
| 1 | 2.537057000  | 1.534657000  | 2.956464000  | 6 | -4.941386000 | -4.835612000 | 1.047571000  |
| 6 | 1.466372000  | 3.223055000  | 3.727512000  | 1 | -5.209062000 | -5.372309000 | 1.950051000  |
| 1 | 2.371958000  | 3.801004000  | 3.887631000  | 6 | -5.009100000 | -3.451175000 | 0.975611000  |
| 6 | 0.225915000  | 3.760730000  | 4.057551000  | 1 | -5.336003000 | -2.888556000 | 1.845664000  |
| 1 | 0.157231000  | 4.760715000  | 4.475449000  | 6 | -5.376470000 | 3.900703000  | -0.061958000 |
| 6 | -0.927769000 | 3.005879000  | 3.851505000  | 6 | -7.705050000 | 5.456962000  | -0.116339000 |
| 1 | -1.900870000 | 3.414691000  | 4.107820000  | 6 | -6.305277000 | 3.828131000  | 0.983881000  |
| 6 | -0.840159000 | 1.725301000  | 3.315820000  | 6 | -5.634331000 | 4.756764000  | -1.141131000 |
| 1 | -1.749208000 | 1.151116000  | 3.157155000  | 6 | -6.793062000 | 5.526495000  | -1.167496000 |
| 6 | -0.428502000 | 3.076525000  | -0.350935000 | 6 | -7.458459000 | 4.606184000  | 0.958924000  |
| 6 | -0.181348000 | 4.465757000  | -0.458987000 | 1 | -6.110874000 | 3.171020000  | 1.827179000  |
| 6 | 1.171736000  | 4.885850000  | -0.578093000 | 1 | -4.936991000 | 4.800550000  | -1.972955000 |
| 6 | 2.152482000  | 3.911374000  | -0.602706000 | 1 | -6.985614000 | 6.178238000  | -2.014483000 |
| 1 | 3.189838000  | 4.214436000  | -0.681332000 | 1 | -8.164527000 | 4.548348000  | 1.781977000  |
| 6 | 1.826783000  | 2.551011000  | -0.475311000 | 1 | -8.606595000 | 6.061963000  | -0.136822000 |
| 6 | 2.881067000  | 1.481278000  | -0.368848000 | 6 | 1.565605000  | 6.311236000  | -0.660416000 |
| 1 | 2.507742000  | 0.576678000  | -0.862045000 | 6 | 2.403687000  | 8.980251000  | -0.794311000 |
| 1 | 2.971168000  | 1.221111000  | 0.694381000  | 6 | 1.183636000  | 7.226244000  | 0.329826000  |
| 6 | 4.270449000  | 1.840849000  | -0.906771000 | 6 | 2.380645000  | 6.748443000  | -1.711766000 |
| 1 | 4.208152000  | 2.030529000  | -1.984478000 | 6 | 2.791292000  | 8.076151000  | -1.780821000 |
| 1 | 4.632342000  | 2.759450000  | -0.434578000 | 6 | 1.603533000  | 8.551079000  | 0.262722000  |
| 6 | 5.266795000  | 0.745408000  | -0.633820000 | 1 | 0.577243000  | 6.891369000  | 1.166885000  |
| 6 | 5.370893000  | -0.356711000 | -1.490630000 | 1 | 2.677509000  | 6.045517000  | -2.485280000 |
| 1 | 4.745872000  | -0.411014000 | -2.376925000 | 1 | 3.414063000  | 8.404565000  | -2.607622000 |
| 6 | 6.267900000  | -1.382294000 | -1.228037000 | 1 | 1.308895000  | 9.248220000  | 1.041491000  |
| 1 | 6.358492000  | -2.237816000 | -1.886822000 | 1 | 2.726756000  | 10.015671000 | -0.846950000 |
| 6 | 7.059763000  | -1.299083000 | -0.087216000 | 7 | -4.394290000 | -6.987458000 | 0.004316000  |
| 6 | 6.984626000  | -0.218011000 | 0.784203000  | 7 | 7.984784000  | -2.382225000 | 0.211786000  |
| 1 | 7.621501000  | -0.186973000 | 1.659966000  | 8 | 8.616438000  | -2.324536000 | 1.257859000  |
| 6 | 6.086755000  | 0.801008000  | 0.499568000  | 8 | 8.077388000  | -3.296654000 | -0.594722000 |
| 1 | 6.022165000  | 1.655157000  | 1.168067000  | 8 | -3.866466000 | -7.569369000 | -0.933934000 |
| 6 | -1.284117000 | 5.374065000  | -0.461040000 | 8 | -4.823230000 | -7.545092000 | 1.003517000  |
| 1 | -1.087609000 | 6.434630000  | -0.567589000 |   |              |              |              |
| 6 | -2.562331000 | 4.931890000  | -0.330976000 |   |              |              |              |
| 1 | -3.380619000 | 5.642354000  | -0.314677000 |   |              |              |              |
| 6 | -2.854916000 | 3.539353000  | -0.201054000 |   |              |              |              |
| 6 | -1.790731000 | 2.606187000  | -0.202369000 |   |              |              |              |
| 6 | -4.175537000 | 3.034618000  | -0.039383000 |   |              |              |              |
| 6 | -4.327896000 | 1.673016000  | 0.147767000  |   |              |              |              |
| 1 | -5.324301000 | 1.265218000  | 0.275429000  |   |              |              |              |
| 6 | -3.220073000 | 0.809876000  | 0.125694000  |   |              |              |              |
| 6 | -3.374880000 | -0.675794000 | 0.304738000  |   |              |              |              |
| 1 | -3.290434000 | -0.912318000 | 1.373940000  |   |              |              |              |

## References

- [1] A.D. Becke, The Journal of Chemical Physics, 98 (1993) 5648-5652.  
[2] J.P. Perdew, J.A. Chevary, S.H. Vosko, K.A. Jackson, M.R. Pederson, D.J. Singh, C. Fiolhais, Physical Review B, 46 (1992) 6671-6687.



- [3] J.P. Perdew, J.A. Chevary, S.H. Vosko, K.A. Jackson, M.R. Pederson, D.J. Singh, C. Fiolhais, *Physical Review B*, 48 (1993) 4978-4978.
- [4] J.P. Perdew, K. Burke, Y. Wang, *Physical Review B*, 54 (1996) 16533-16539.
- [5] J.P. Perdew, K. Burke, Y. Wang, *Physical Review B*, 57 (1998) 14999-14999.
- [6] B. Miehlich, A. Savin, H. Stoll, H. Preuss, *Chemical Physics Letters*, 157 (1989) 200-206.
- [7] Y. Zhao, D.G. Truhlar, *Theoretical Chemistry Accounts*, 120 (2008) 215-241.
- [8] X. Shang, D. Han, D. Li, S. Guan, Z. Wu, *Chemical Physics Letters*, 588 (2013) 68-75.
- [9] J.-D. Chai, M. Head-Gordon, *Physical Chemistry Chemical Physics*, 10 (2008) 6615-6620.
- [10] C. Adamo, V. Barone, *The Journal of Chemical Physics*, 110 (1999) 6158-6170.
- [11] N. Armaroli, G. Accorsi, M. Holler, O. Moudam, J.F. Nierengarten, Z. Zhou, R.T. Wegh, R. Welter, *Advanced Materials*, 18 (2006) 1313-1316.
- [12] X. Shang, D. Han, Q. Zhan, D. Zhou, G. Zhang, *New Journal of Chemistry*, 39 (2015) 2588-2595.
- [13] Q. Zhang, L. Wang, X. Wang, Y. Li, J. Zhang, *Organic Electronics*, 28 (2016) 100-110.
- [14] K. Zhang, D. Zhang, *Spectrochimica Acta Part A: Molecular and Biomolecular Spectroscopy*, 124 (2014) 341-348.
- [15] A. Hagfeldt, G. Boschloo, L. Sun, L. Kloo, H. Pettersson, *Chemical Reviews*, 110 (2010) 6595-6663.
- [16] L. Yang, D.R. Powell, R.P. Houser, *Journal of the Chemical Society. Dalton Transactions*, (2007) 955-964.
- [17] M.G. Fraser, H. Van Der Salm, S.A. Cameron, A.G. Blackman, K.C. Gordon, *Inorganic Chemistry*, 52 (2013) 2980-2992.
- [18] S. Wei, K. Li, X. Lu, Z. Zhao, Y. Shao, Y. Dang, S. Li, W. Guo, *Materials Chemistry and Physics*, 173 (2016) 139-145.
- [19] Y. Shao, Z. Gan, E. Epifanovsky, A.T.B. Gilbert, M. Wormit, J. Kussmann, A.W. Lange, A. Behn, J. Deng, X. Feng, D. Ghosh, M. Goldey, P.R. Horn, L.D. Jacobson, I. Kaliman, R.Z. Khaliullin, T. Kuś, A. Landau, J. Liu, E.I. Proynov, Y.M. Rhee, R.M. Richard, M.A. Rohrdanz, R.P. Steele, E.J. Sundstrom, H.L. Woodcock, P.M. Zimmerman, D. Zuev, B. Albrecht, E. Alguire, B. Austin, G.J.O. Beran, Y.A. Bernard, E. Berquist, K. Brandhorst, K.B. Bravaya, S.T. Brown, D. Casanova, C.-M. Chang, Y. Chen, S.H. Chien, K.D. Closser, D.L. Crittenden, M. Diedenhofen, R.A. DiStasio, H. Do, A.D. Dutoi, R.G. Edgar, S. Fatehi, L. Fusti-Molnar, A. Ghysels, A. Golubeva-Zadorozhnaya, J. Gomes, M.W.D. Hanson-Heine, P.H.P. Harbach, A.W. Hauser, E.G. Hohenstein, Z.C. Holden, T.-C. Jagau, H. Ji, B. Kaduk, K. Khistyayev, J. Kim, J. Kim, R.A. King, P. Klunzinger, D. Kosenkov, T. Kowalczyk, C.M. Krauter, K.U. Lao, A.D. Laurent, K.V. Lawler, S.V. Levchenko, C.Y. Lin, F. Liu, E. Livshits, R.C. Lochan, A. Luenser, P. Manohar, S.F. Manzer, S.-P. Mao, N. Mardirossian, A.V. Marenich, S.A. Maurer, N.J. Mayhall, E. Neuscamman, C.M. Oana, R. Olivares-Amaya, D.P. O'Neill, J.A. Parkhill, T.M. Perrine, R. Peverati, A. Prociuk, D.R. Rehn, E. Rosta, N.J. Russ, S.M. Sharada, S. Sharma, D.W. Small, A. Sodt, T. Stein, D. Stück, Y.-C. Su, A.J.W. Thom, T. Tsuchimochi, V. Vanovschi, L. Vogt, O. Vydrov, T. Wang, M.A. Watson, J. Wenzel, A. White, C.F. Williams, J. Yang, S. Yeganeh, S.R. Yost, Z.-Q. You, I.Y. Zhang, X. Zhang, Y. Zhao, B.R. Brooks, G.K.L. Chan, D.M. Chipman, C.J. Cramer, W.A. Goddard, M.S. Gordon, W.J. Hehre, A. Klamt, H.F. Schaefer, M.W. Schmidt, C.D. Sherrill, D.G. Truhlar, A. Warshel, X. Xu, A. Aspuru-Guzik, R. Baer, A.T. Bell, N.A. Besley, J.-D. Chai, A. Dreuw, B.D. Dunietz, T.R. Furlani, S.R. Gwaltney, C.-P. Hsu,

Y. Jung, J. Kong, D.S. Lambrecht, W. Liang, C. Ochsenfeld, V.A. Rassolov, L.V. Slipchenko, J.E. Subotnik, T. Van Voorhis, J.M. Herbert, A.I. Krylov, P.M.W. Gill, M. Head-Gordon, *Molecular Physics*, 113 (2015) 184-215.

[20] P.R. Horn, Y. Mao, M. Head-Gordon, *Physical Chemistry Chemical Physics*, 18 (2016) 23067-23079.

[21] G. Zhang, X. Li, X. Jiang, P. Sun, *Journal of Luminescence*, 130 (2010) 976-980.
